# Supplementary material
Source: publisher site journal article supplement (https://www.spandidos-publications.com/5005/downloadSupplementary)
Supplement: Supplementary file 2 [file downloadSupplementary]

## Sheet: Table SIV
Table SIV. The GO and KEGG analysis of DPY30 co-expressed genes.									Count
ONTOLOGY	ID	Description	GeneRatio	BgRatio	P-value	p.adjust	qvalue	geneID	36
BP	GO:0070125	mitochondrial translational elongation	36/562	88/18670	8.095*10^-32	2.722*10^-28	2.372*10^-28	MRPL58/MRPL12/DAP3/MRPL33/TSFM/MRPL28/MRPL3/MRPS28/MRPL13/MRPL18/MRPL15/MRPL22/MRPL51/MRPS17/MRPS23/MRPS21/AURKAIP1/MRPL20/MRPL47/MRPL17/MRPS26/MRPS15/MRPS9/MRPL40/MRPL36/MRPL11/MRPL9/MRPS34/MRPL57/MRPL24/MRPL43/GADD45GIP1/MRPL53/CHCHD1/MRPL52/MRPL55	35
BP	GO:0070126	mitochondrial translational termination	35/562	89/18670	3.026*10^-30	5.088*10^-27	4.434*10^-27	MRPL58/MRPL12/DAP3/MRPL33/MRPL28/MRPL3/MRPS28/MRPL13/MRPL18/MRPL15/MRPL22/MRPL51/MRPS17/MRPS23/MRPS21/AURKAIP1/MRPL20/MRPL47/MRPL17/MRPS26/MRPS15/MRPS9/MRPL40/MRPL36/MRPL11/MRPL9/MRPS34/MRPL57/MRPL24/MRPL43/GADD45GIP1/MRPL53/CHCHD1/MRPL52/MRPL55	36
BP	GO:0006415	translational termination	36/562	104/18670	9.355*10^-29	1.049*10^-25	9.138*10^-26	MRPL58/MRPL12/DAP3/MRPL33/MRPL28/MRPL3/MRPS28/MRPL13/MRPL18/MRPL15/MRPL22/MRPL51/MRPS17/TRMT112/MRPS23/MRPS21/AURKAIP1/MRPL20/MRPL47/MRPL17/MRPS26/MRPS15/MRPS9/MRPL40/MRPL36/MRPL11/MRPL9/MRPS34/MRPL57/MRPL24/MRPL43/GADD45GIP1/MRPL53/CHCHD1/MRPL52/MRPL55	39
BP	GO:0006414	translational elongation	39/562	133/18670	6.136*10^-28	5.159*10^-25	4.495*10^-25	EEF1G/MRPL58/MRPL12/DAP3/MRPL33/SECISBP2L/TSFM/MRPL28/MRPL3/MRPS28/MRPL13/MRPL18/MRPL15/MRPL22/MRPL51/MRPS17/DPH5/MRPS23/MRPS21/AURKAIP1/MRPL20/MRPL47/MRPL17/MRPS26/MRPS15/MRPS9/MRPL40/MRPL36/MRPL11/MRPL9/MRPS34/MRPL57/MRPL24/MRPL43/GADD45GIP1/MRPL53/CHCHD1/MRPL52/MRPL55	39
BP	GO:0032543	mitochondrial translation	39/562	135/18670	1.151*10^-27	7.743*10^-25	6.747*10^-25	MRPL58/MRPL12/DAP3/MRPL33/TSFM/MRPL28/MRPL3/MRPS28/MRPL13/MRPL18/MRPL15/MRPL22/MTERF3/MRPL51/MRPS17/MRPS23/MRPS21/AURKAIP1/MRPL20/MRPL47/MRPL17/MRPS26/MRPS15/MRPS9/MRPL40/MRPL36/MRPL11/MRPL9/MRPS34/MRPL57/MRPL24/UQCC2/MRPL43/GADD45GIP1/MALSU1/MRPL53/CHCHD1/MRPL52/MRPL55	54
BP	GO:0042254	ribosome biogenesis	54/562	297/18670	6.139*10^-27	3.441*10^-24	2.998*10^-24	DKC1/FBL/NPM1/PA2G4/RAN/RPL5/RPL6/RPL24/RPL35A/RPL38/RPS7/RPS21/RPS24/ZNHIT3/MPHOSPH10/NPM3/EMG1/C1D/EBNA1BP2/LSM6/NGDN/MRPL22/ABT1/GNL2/MRM2/MTERF3/EXOSC3/EXOSC1/UTP11/RPL26L1/MRTO4/POP5/TRMT112/NOP58/GAR1/EXOSC4/WDR74/PAK1IP1/MRPL20/BRIX1/LYAR/EXOSC5/MRPS9/MRPL36/MRPL11/ERI3/NOL10/RPF1/LAS1L/RPF2/TSR2/MALSU1/RBIS/GTF2H5	67
BP	GO:0008380	RNA splicing	67/562	469/18670	8.116*10^-27	3.899*10^-24	3.398*10^-24	FUS/HNRNPC/MAGOH/YBX1/PCBP2/POLR2C/POLR2G/POLR2H/POLR2I/POLR2K/RP9/SRSF2/SRSF3/SRSF7/SMN1/SNRPA/SNRPA1/SNRPC/SNRPD1/SNRPD2/SNRPD3/SNRPE/SNRPF/SNRPG/PABPN1/GEMIN2/BUD31/PRDX6/RBM8A/PQBP1/ALYREF/MPHOSPH10/SF3B4/BCAS2/PPIE/PPIH/USP39/RNPS1/SF3A3/SNRNP27/LSM6/SETX/TARDBP/LSM5/LSM4/LSM3/RBMX/ARL6IP4/CWC15/RBMX2/SF3B6/CPSF3/MAGOHB/ISY1/LSM2/UBL5/SCNM1/AHNAK/TSEN34/THOC6/SNRNP25/GEMIN6/THOC7/SF3B5/TRPT1…	41
BP	GO:0140053	mitochondrial gene expression	41/562	162/18670	1.554*10^-26	6.531*10^-24	5.691*10^-24	HSD17B10/MRPL58/MRPL12/DAP3/MRPL33/TSFM/MRPL28/MRPL3/MRPS28/MRPL13/MRPL18/MRPL15/MRPL22/MTERF3/MRPL51/MRPS17/MRPS23/MRPS21/TRIT1/AURKAIP1/MRPL20/MRPL47/MRPL17/MRPS26/MRPS15/MRPS9/MRPL40/MRPL36/MRPL11/MRPL9/MRPS34/MRPL57/MRPL24/UQCC2/MRPL43/GADD45GIP1/MALSU1/MRPL53/CHCHD1/MRPL52/MRPL55	58
BP	GO:0000375	RNA splicing, via transesterification reactions	58/562	382/18670	1.139*10^-24	4.256*10^-22	3.708*10^-22	FUS/HNRNPC/MAGOH/YBX1/PCBP2/POLR2C/POLR2G/POLR2H/POLR2I/POLR2K/SRSF2/SRSF3/SRSF7/SMN1/SNRPA/SNRPA1/SNRPC/SNRPD1/SNRPD2/SNRPD3/SNRPE/SNRPF/SNRPG/PABPN1/GEMIN2/BUD31/PRDX6/RBM8A/PQBP1/ALYREF/MPHOSPH10/SF3B4/BCAS2/PPIE/PPIH/USP39/RNPS1/SF3A3/SNRNP27/LSM6/SETX/LSM5/LSM4/LSM3/RBMX/CWC15/RBMX2/SF3B6/CPSF3/MAGOHB/ISY1/LSM2/UBL5/SCNM1/SNRNP25/GEMIN6/SF3B5/ZCRB1	57
BP	GO:0000377	RNA splicing, via transesterification reactions with bulged adenosine as nucleophile	57/562	379/18670	4.798*10^-24	1.467*10^-21	1.278*10^-21	FUS/HNRNPC/MAGOH/YBX1/PCBP2/POLR2C/POLR2G/POLR2H/POLR2I/POLR2K/SRSF2/SRSF3/SRSF7/SMN1/SNRPA/SNRPA1/SNRPC/SNRPD1/SNRPD2/SNRPD3/SNRPE/SNRPF/SNRPG/PABPN1/GEMIN2/BUD31/PRDX6/RBM8A/PQBP1/ALYREF/SF3B4/BCAS2/PPIE/PPIH/USP39/RNPS1/SF3A3/SNRNP27/LSM6/SETX/LSM5/LSM4/LSM3/RBMX/CWC15/RBMX2/SF3B6/CPSF3/MAGOHB/ISY1/LSM2/UBL5/SCNM1/SNRNP25/GEMIN6/SF3B5/ZCRB1	57
BP	GO:0000398	mRNA splicing, via spliceosome	57/562	379/18670	4.798*10^-24	1.467*10^-21	1.278*10^-21	FUS/HNRNPC/MAGOH/YBX1/PCBP2/POLR2C/POLR2G/POLR2H/POLR2I/POLR2K/SRSF2/SRSF3/SRSF7/SMN1/SNRPA/SNRPA1/SNRPC/SNRPD1/SNRPD2/SNRPD3/SNRPE/SNRPF/SNRPG/PABPN1/GEMIN2/BUD31/PRDX6/RBM8A/PQBP1/ALYREF/SF3B4/BCAS2/PPIE/PPIH/USP39/RNPS1/SF3A3/SNRNP27/LSM6/SETX/LSM5/LSM4/LSM3/RBMX/CWC15/RBMX2/SF3B6/CPSF3/MAGOHB/ISY1/LSM2/UBL5/SCNM1/SNRNP25/GEMIN6/SF3B5/ZCRB1	33
BP	GO:0006119	oxidative phosphorylation	33/562	145/18670	5.017*10^-20	1.406*10^-17	1.225*10^-17	ATP5F1E/ATP5MC2/ATP5ME/ATP5PF/CCNB1/CDK1/COX5B/COX6A1/COX6C/COX7B/MSH2/NDUFA2/NDUFAB1/NDUFB3/NDUFB4/NDUFB8/NDUFB10/NDUFS5/NDUFS6/NDUFS8/UQCRB/UQCRH/COX7A2L/ATP5MF/ATP5PD/PARK7/UQCR10/NDUFB11/NDUFA12/UQCC2/COA6/UQCRHL/UQCC3	52
BP	GO:0006401	RNA catabolic process	52/562	397/18670	2.892*10^-19	7.481*10^-17	6.519*10^-17	DKC1/HNRNPC/MAGOH/NPM1/YBX1/POLR2G/PSMA1/PSMA2/PSMA4/PSMA7/PSMB1/PSMB3/PSMB4/PSMB6/PSMD4/PSMD10/RPL5/RPL6/RPL24/RPL30/RPL27A/RPL31/RPL35A/RPL37/RPL38/RPL39/RPL36A/RPS7/RPS20/RPS21/RPS24/RPS27A/RBM8A/PSMD14/RIDA/RNASEH2A/RNPS1/LSM6/TARDBP/LSM5/LSM4/LSM3/EXOSC3/EXOSC1/MRTO4/EXOSC4/MAGOHB/EXOSC5/LSM2/TRIR/SLIRP/PYM1	38
BP	GO:0006364	rRNA processing	38/562	214/18670	6.860*10^-19	1.648*10^-16	1.436*10^-16	DKC1/FBL/PA2G4/RPL5/RPL35A/RPS7/RPS21/RPS24/ZNHIT3/MPHOSPH10/NPM3/EMG1/C1D/EBNA1BP2/LSM6/NGDN/ABT1/MRM2/EXOSC3/EXOSC1/UTP11/MRTO4/POP5/TRMT112/NOP58/GAR1/EXOSC4/WDR74/LYAR/EXOSC5/MRPS9/ERI3/NOL10/RPF1/LAS1L/RPF2/TSR2/GTF2H5	50
BP	GO:0034470	ncRNA processing	50/562	384/18670	1.885*10^-18	4.227*10^-16	3.683*10^-16	DKC1/FBL/HSD17B10/METTL1/PA2G4/RPL5/RPL35A/RPS7/RPS21/RPS24/LAGE3/ZNHIT3/MPHOSPH10/NPM3/EMG1/C1D/EBNA1BP2/LSM6/ELP5/NGDN/ABT1/MRM2/TPRKB/EXOSC3/EXOSC1/UTP11/MRTO4/POP5/TRMT112/NOP58/POLR3K/GAR1/EXOSC4/WDR74/TRIT1/LYAR/EXOSC5/MRPS9/ERI3/TSEN34/RPP21/NOL10/RPF1/THUMPD2/LAS1L/TRPT1/RPF2/TSR2/ZBTB8OS/GTF2H5	48
BP	GO:0006402	mRNA catabolic process	48/562	364/18670	5.574*10^-18	1.164*10^-15	1.014*10^-15	HNRNPC/MAGOH/NPM1/YBX1/POLR2G/PSMA1/PSMA2/PSMA4/PSMA7/PSMB1/PSMB3/PSMB4/PSMB6/PSMD4/PSMD10/RPL5/RPL6/RPL24/RPL30/RPL27A/RPL31/RPL35A/RPL37/RPL38/RPL39/RPL36A/RPS7/RPS20/RPS21/RPS24/RPS27A/RBM8A/PSMD14/RIDA/RNPS1/LSM6/TARDBP/LSM5/LSM4/LSM3/EXOSC3/EXOSC1/MRTO4/EXOSC4/MAGOHB/EXOSC5/LSM2/PYM1	40
BP	GO:0016072	rRNA metabolic process	40/562	253/18670	5.885*10^-18	1.164*10^-15	1.014*10^-15	DKC1/FBL/PA2G4/RPL5/RPL35A/RPS7/RPS21/RPS24/TCOF1/ZNHIT3/MPHOSPH10/NPM3/EMG1/C1D/EBNA1BP2/LSM6/NGDN/ABT1/MRM2/EXOSC3/EXOSC1/UTP11/MRTO4/POP5/TRMT112/NOP58/GAR1/EXOSC4/WDR74/LYAR/EXOSC5/MRPS9/TRIR/ERI3/NOL10/RPF1/LAS1L/RPF2/TSR2/GTF2H5	37
BP	GO:0043624	cellular protein complex disassembly	37/562	217/18670	8.169*10^-18	1.526*10^-15	1.330*10^-15	MRPL58/STMN1/MRPL12/DAP3/MRPL33/MRPL28/MRPL3/MRPS28/MRPL13/MRPL18/MRPL15/MRPL22/MRPL51/MRPS17/TRMT112/MRPS23/MRPS21/AURKAIP1/MRPL20/MRPL47/MRPL17/MRPS26/MRPS15/MRPS9/MRPL40/MRPL36/MRPL11/MRPL9/MRPS34/MRPL57/MRPL24/MRPL43/GADD45GIP1/MRPL53/CHCHD1/MRPL52/MRPL55	25
BP	GO:0042773	ATP synthesis coupled electron transport	25/562	98/18670	9.535*10^-17	1.688*10^-14	1.471*10^-14	CCNB1/CDK1/COX5B/COX6A1/COX6C/COX7B/NDUFA2/NDUFAB1/NDUFB3/NDUFB4/NDUFB8/NDUFB10/NDUFS5/NDUFS6/NDUFS8/UQCRB/UQCRH/COX7A2L/PARK7/UQCR10/NDUFB11/NDUFA12/COA6/UQCRHL/UQCC3	24
BP	GO:0042775	mitochondrial ATP synthesis coupled electron transport	24/562	97/18670	8.429*10^-16	1.417*10^-13	1.235*10^-13	CCNB1/CDK1/COX5B/COX6A1/COX6C/COX7B/NDUFA2/NDUFAB1/NDUFB3/NDUFB4/NDUFB8/NDUFB10/NDUFS5/NDUFS6/NDUFS8/UQCRB/UQCRH/COX7A2L/PARK7/UQCR10/NDUFB11/NDUFA12/UQCRHL/UQCC3	26
BP	GO:0022904	respiratory electron transport chain	26/562	117/18670	8.873*10^-16	1.421*10^-13	1.238*10^-13	CCNB1/CDK1/COX5B/COX6A1/COX6C/COX7B/NDUFA2/NDUFAB1/NDUFB3/NDUFB4/NDUFB8/NDUFB10/NDUFS5/NDUFS6/NDUFS8/SDHB/UQCRB/UQCRH/COX7A2L/PARK7/UQCR10/NDUFB11/NDUFA12/COA6/UQCRHL/UQCC3	41
BP	GO:0032984	protein-containing complex disassembly	41/562	329/18670	1.157*10^-14	1.768*10^-12	1.541*10^-12	MRPL58/STMN1/MRPL12/DAP3/MRPL33/MRPL28/MRPL3/SETX/SNAPIN/MRPS28/MRPL13/MRPL18/MRPL15/MRPL22/MRPL51/MRPS17/TRMT112/MRPS23/MRPS21/AURKAIP1/MRPL20/MRPL47/MRPL17/MRPS26/MRPS15/MRPS9/MRPL40/MRPL36/MRPL11/MRPL9/MRPS34/MRPL57/FYCO1/MRPL24/PYM1/MRPL43/GADD45GIP1/MRPL53/CHCHD1/MRPL52/MRPL55	21
BP	GO:0031145	anaphase-promoting complex-dependent catabolic process	21/562	81/18670	1.969*10^-14	2.879*10^-12	2.509*10^-12	CCNB1/CDK1/CDC20/PSMA1/PSMA2/PSMA4/PSMA7/PSMB1/PSMB3/PSMB4/PSMB6/PSMD4/PSMD10/RPS27A/AURKB/PTTG1/PSMD14/UBE2C/UBE2S/ANAPC11/ANAPC16	32
BP	GO:0000956	nuclear-transcribed mRNA catabolic process	32/562	207/18670	2.508*10^-14	3.515*10^-12	3.063*10^-12	MAGOH/POLR2G/RPL5/RPL6/RPL24/RPL30/RPL27A/RPL31/RPL35A/RPL37/RPL38/RPL39/RPL36A/RPS7/RPS20/RPS21/RPS24/RPS27A/RBM8A/RNPS1/LSM6/LSM5/LSM4/LSM3/EXOSC3/EXOSC1/MRTO4/EXOSC4/MAGOHB/EXOSC5/LSM2/PYM1	33
BP	GO:0006403	RNA localization	33/562	230/18670	8.801*10^-14	1.184*10^-11	1.032*10^-11	CETN2/CETN3/DKC1/FBL/MAGOH/NPM1/RAN/SRSF2/SRSF3/SRSF7/CCT3/SLBP/AAAS/PABPN1/RAE1/ZNHIT3/RBM8A/ALYREF/NUTF2/CCT7/CCT4/CCT8/RNPS1/MRPL18/EXOSC3/NOP58/CPSF3/MAGOHB/ENY2/NUP37/THOC6/THOC7/SARNP	40
BP	GO:0009144	purine nucleoside triphosphate metabolic process	40/562	342/18670	2.038*10^-13	2.637*10^-11	2.298*10^-11	ATP5F1E/ATP5MC2/ATP5ME/ATP5PF/CCNB1/CDK1/COX5B/COX6A1/COX6C/COX7B/DGUOK/MSH2/NUDT1/NDUFA2/NDUFAB1/NDUFB3/NDUFB4/NDUFB8/NDUFB10/NDUFS5/NDUFS6/NDUFS8/NME1/RAN/UQCRB/UQCRH/AAAS/RAE1/COX7A2L/ATP5MF/ATP5PD/PARK7/UQCR10/NDUFB11/NDUFA12/NUP37/UQCC2/COA6/UQCRHL/UQCC3	41
BP	GO:0009141	nucleoside triphosphate metabolic process	41/562	362/18670	2.963*10^-13	3.690*10^-11	3.216*10^-11	ATP5F1E/ATP5MC2/ATP5ME/ATP5PF/CCNB1/CDK1/COX5B/COX6A1/COX6C/COX7B/DGUOK/MSH2/NUDT1/NDUFA2/NDUFAB1/NDUFB3/NDUFB4/NDUFB8/NDUFB10/NDUFS5/NDUFS6/NDUFS8/NME1/RAN/TYMS/UQCRB/UQCRH/AAAS/RAE1/COX7A2L/ATP5MF/ATP5PD/PARK7/UQCR10/NDUFB11/NDUFA12/NUP37/UQCC2/COA6/UQCRHL/UQCC3	26
BP	GO:0031123	RNA 3'-end processing	26/562	150/18670	4.535*10^-13	5.447*10^-11	4.746*10^-11	CCNB1/DKC1/FBL/HSD17B10/MAGOH/RPS21/SRSF2/SRSF3/SRSF7/SNRPA/SLBP/NELFE/PABPN1/RBM8A/ALYREF/RNPS1/EXOSC3/CPSF3/POLR3K/EXOSC4/MAGOHB/EXOSC5/ERI3/THOC6/THOC7/SARNP	28
BP	GO:0019083	viral transcription	28/562	177/18670	5.957*10^-13	6.908*10^-11	6.019*10^-11	POLR2C/POLR2G/POLR2H/POLR2I/POLR2K/RPL5/RPL6/RPL24/RPL30/RPL27A/RPL31/RPL35A/RPL37/RPL38/RPL39/RPL36A/RPS7/RPS20/RPS21/RPS24/RPS27A/SUPT4H1/TFAP4/NELFE/AAAS/RAE1/TARDBP/NUP37	29
BP	GO:0019080	viral gene expression	29/562	191/18670	6.688*10^-13	7.498*10^-11	6.534*10^-11	PCBP2/POLR2C/POLR2G/POLR2H/POLR2I/POLR2K/RPL5/RPL6/RPL24/RPL30/RPL27A/RPL31/RPL35A/RPL37/RPL38/RPL39/RPL36A/RPS7/RPS20/RPS21/RPS24/RPS27A/SUPT4H1/TFAP4/NELFE/AAAS/RAE1/TARDBP/NUP37	29
BP	GO:0045333	cellular respiration	29/562	193/18670	8.765*10^-13	9.509*10^-11	8.286*10^-11	CCNB1/CDK1/COX5B/COX6A1/COX6C/COX7B/BLOC1S1/MDH1/NDUFA2/NDUFAB1/NDUFB3/NDUFB4/NDUFB8/NDUFB10/NDUFS5/NDUFS6/NDUFS8/SDHB/UQCRB/UQCRH/COX7A2L/PARK7/UQCR10/NDUFB11/NDUFA12/MTFR2/COA6/UQCRHL/UQCC3	28
BP	GO:0022900	electron transport chain	28/562	186/18670	2.081*10^-12	2.187*10^-10	1.906*10^-10	CCNB1/CDK1/COX5B/COX6A1/COX6C/COX7B/NDUFA2/NDUFAB1/NDUFB3/NDUFB4/NDUFB8/NDUFB10/NDUFS5/NDUFS6/NDUFS8/SDHB/UQCRB/UQCRH/COX7A2L/PARK7/UQCR10/GLRX5/NDUFB11/NDUFA12/FDX2/COA6/UQCRHL/UQCC3	38
BP	GO:0009205	purine ribonucleoside triphosphate metabolic process	38/562	335/18670	2.150*10^-12	2.191*10^-10	1.909*10^-10	ATP5F1E/ATP5MC2/ATP5ME/ATP5PF/CCNB1/CDK1/COX5B/COX6A1/COX6C/COX7B/MSH2/NDUFA2/NDUFAB1/NDUFB3/NDUFB4/NDUFB8/NDUFB10/NDUFS5/NDUFS6/NDUFS8/NME1/RAN/UQCRB/UQCRH/AAAS/RAE1/COX7A2L/ATP5MF/ATP5PD/PARK7/UQCR10/NDUFB11/NDUFA12/NUP37/UQCC2/COA6/UQCRHL/UQCC3	18
BP	GO:0042273	ribosomal large subunit biogenesis	18/562	71/18670	2.222*10^-12	2.198*10^-10	1.915*10^-10	NPM1/RPL5/RPL6/RPL24/RPL35A/RPL38/ZNHIT3/EBNA1BP2/RPL26L1/MRTO4/WDR74/PAK1IP1/MRPL20/BRIX1/MRPL11/LAS1L/RPF2/MALSU1	36
BP	GO:0046034	ATP metabolic process	36/562	305/18670	2.575*10^-12	2.474*10^-10	2.156*10^-10	ATP5F1E/ATP5MC2/ATP5ME/ATP5PF/CCNB1/CDK1/COX5B/COX6A1/COX6C/COX7B/MSH2/NDUFA2/NDUFAB1/NDUFB3/NDUFB4/NDUFB8/NDUFB10/NDUFS5/NDUFS6/NDUFS8/UQCRB/UQCRH/AAAS/RAE1/COX7A2L/ATP5MF/ATP5PD/PARK7/UQCR10/NDUFB11/NDUFA12/NUP37/UQCC2/COA6/UQCRHL/UQCC3	38
BP	GO:0009199	ribonucleoside triphosphate metabolic process	38/562	341/18670	3.713*10^-12	3.469*10^-10	3.023*10^-10	ATP5F1E/ATP5MC2/ATP5ME/ATP5PF/CCNB1/CDK1/COX5B/COX6A1/COX6C/COX7B/MSH2/NDUFA2/NDUFAB1/NDUFB3/NDUFB4/NDUFB8/NDUFB10/NDUFS5/NDUFS6/NDUFS8/NME1/RAN/UQCRB/UQCRH/AAAS/RAE1/COX7A2L/ATP5MF/ATP5PD/PARK7/UQCR10/NDUFB11/NDUFA12/NUP37/UQCC2/COA6/UQCRHL/UQCC3	37
BP	GO:0009167	purine ribonucleoside monophosphate metabolic process	37/562	340/18670	1.456*10^-11	1.324*10^-9	1.154*10^-9	ATP5F1E/ATP5MC2/ATP5ME/ATP5PF/CCNB1/CDK1/COX5B/COX6A1/COX6C/COX7B/HPRT1/MSH2/NDUFA2/NDUFAB1/NDUFB3/NDUFB4/NDUFB8/NDUFB10/NDUFS5/NDUFS6/NDUFS8/UQCRB/UQCRH/AAAS/RAE1/COX7A2L/ATP5MF/ATP5PD/PARK7/UQCR10/NDUFB11/NDUFA12/NUP37/UQCC2/COA6/UQCRHL/UQCC3	37
BP	GO:0009126	purine nucleoside monophosphate metabolic process	37/562	341/18670	1.589*10^-11	1.406*10^-9	1.225*10^-9	ATP5F1E/ATP5MC2/ATP5ME/ATP5PF/CCNB1/CDK1/COX5B/COX6A1/COX6C/COX7B/HPRT1/MSH2/NDUFA2/NDUFAB1/NDUFB3/NDUFB4/NDUFB8/NDUFB10/NDUFS5/NDUFS6/NDUFS8/UQCRB/UQCRH/AAAS/RAE1/COX7A2L/ATP5MF/ATP5PD/PARK7/UQCR10/NDUFB11/NDUFA12/NUP37/UQCC2/COA6/UQCRHL/UQCC3	39
BP	GO:0009123	nucleoside monophosphate metabolic process	39/562	375/18670	1.635*10^-11	1.410*10^-9	1.228*10^-9	ATP5F1E/ATP5MC2/ATP5ME/ATP5PF/CCNB1/CDK1/COX5B/COX6A1/COX6C/COX7B/DGUOK/HPRT1/MSH2/NDUFA2/NDUFAB1/NDUFB3/NDUFB4/NDUFB8/NDUFB10/NDUFS5/NDUFS6/NDUFS8/TYMS/UQCRB/UQCRH/AAAS/RAE1/COX7A2L/ATP5MF/ATP5PD/PARK7/UQCR10/NDUFB11/NDUFA12/NUP37/UQCC2/COA6/UQCRHL/UQCC3	37
BP	GO:0051169	nuclear transport	37/562	346/18670	2.439*10^-11	2.051*10^-9	1.787*10^-9	EMD/MAGOH/NPM1/RAN/SRSF2/SRSF3/SRSF7/SMN1/SNRPD1/SNRPD2/SNRPD3/SNRPE/SNRPF/SNRPG/YWHAE/SLBP/AAAS/PABPN1/RAE1/GEMIN2/BANF1/RBM8A/ALYREF/NUTF2/RNPS1/AKAP13/PARK7/TARDBP/HIKESHI/CPSF3/MAGOHB/ENY2/NUP37/THOC6/GEMIN6/THOC7/SARNP	37
BP	GO:0009161	ribonucleoside monophosphate metabolic process	37/562	354/18670	4.757*10^-11	3.902*10^-9	3.400*10^-9	ATP5F1E/ATP5MC2/ATP5ME/ATP5PF/CCNB1/CDK1/COX5B/COX6A1/COX6C/COX7B/HPRT1/MSH2/NDUFA2/NDUFAB1/NDUFB3/NDUFB4/NDUFB8/NDUFB10/NDUFS5/NDUFS6/NDUFS8/UQCRB/UQCRH/AAAS/RAE1/COX7A2L/ATP5MF/ATP5PD/PARK7/UQCR10/NDUFB11/NDUFA12/NUP37/UQCC2/COA6/UQCRHL/UQCC3	19
BP	GO:0033108	mitochondrial respiratory chain complex assembly	19/562	96/18670	5.970*10^-11	4.780*10^-9	4.165*10^-9	NDUFA2/NDUFAB1/NDUFB3/NDUFB4/NDUFB8/NDUFB10/NDUFS5/NDUFS6/NDUFS8/UQCRB/COX17/UQCR10/NDUFB11/NDUFAF7/NDUFA12/UQCC2/NDUFAF8/UQCC3/PET100	35
BP	GO:1903311	regulation of mRNA metabolic process	35/562	324/18670	6.452*10^-11	5.046*10^-9	4.397*10^-9	CCNB1/HNRNPC/MAGOH/NPM1/YBX1/POLR2G/PSMA1/PSMA2/PSMA4/PSMA7/PSMB1/PSMB3/PSMB4/PSMB6/PSMD4/PSMD10/RPS27A/SRSF2/SRSF3/SRSF7/SNRPA/NELFE/PABPN1/PRDX6/RBM8A/PSMD14/RIDA/SF3B4/RNPS1/TARDBP/RBMX/EXOSC3/EXOSC1/EXOSC4/EXOSC5	21
BP	GO:0000184	nuclear-transcribed mRNA catabolic process, nonsense-mediated decay	21/562	120/18670	6.784*10^-11	5.185*10^-9	4.518*10^-9	MAGOH/RPL5/RPL6/RPL24/RPL30/RPL27A/RPL31/RPL35A/RPL37/RPL38/RPL39/RPL36A/RPS7/RPS20/RPS21/RPS24/RPS27A/RBM8A/RNPS1/MAGOHB/PYM1	32
BP	GO:0022618	ribonucleoprotein complex assembly	32/562	277/18670	7.635*10^-11	5.685*10^-9	4.954*10^-9	NPM1/RPL5/RPL6/RPL24/RPL38/SMN1/SNRPC/SNRPD1/SNRPD2/SNRPD3/SNRPE/SNRPF/SNRPG/GEMIN2/EIF3I/ZNHIT3/USP39/SF3A3/SETX/LSM4/LSM3/RBMX/MRPL22/ABT1/MTERF3/MRTO4/MRPL20/BRIX1/ISY1/MRPL11/GEMIN6/RPF2	36
BP	GO:0006913	nucleocytoplasmic transport	36/562	343/18670	7.776*10^-11	5.685*10^-9	4.954*10^-9	EMD/MAGOH/NPM1/RAN/SRSF2/SRSF3/SRSF7/SMN1/SNRPD1/SNRPD2/SNRPD3/SNRPE/SNRPF/SNRPG/YWHAE/SLBP/AAAS/PABPN1/RAE1/GEMIN2/RBM8A/ALYREF/NUTF2/RNPS1/AKAP13/PARK7/TARDBP/HIKESHI/CPSF3/MAGOHB/ENY2/NUP37/THOC6/GEMIN6/THOC7/SARNP	32
BP	GO:0071826	ribonucleoprotein complex subunit organization	32/562	291/18670	2.739*10^-10	1.960*10^-8	1.708*10^-8	NPM1/RPL5/RPL6/RPL24/RPL38/SMN1/SNRPC/SNRPD1/SNRPD2/SNRPD3/SNRPE/SNRPF/SNRPG/GEMIN2/EIF3I/ZNHIT3/USP39/SF3A3/SETX/LSM4/LSM3/RBMX/MRPL22/ABT1/MTERF3/MRTO4/MRPL20/BRIX1/ISY1/MRPL11/GEMIN6/RPF2	36
BP	GO:0010948	negative regulation of cell cycle process	36/562	361/18670	3.263*10^-10	2.286*10^-8	1.992*10^-8	CCNB1/CDK1/CDC20/FGF10/MEN1/NEK2/NPM1/PCNA/PSMA1/PSMA2/PSMA4/PSMA7/PSMB1/PSMB3/PSMB4/PSMB6/PSMD4/PSMD10/TFAP4/NAA10/NAE1/AURKB/PTTG1/TRIP13/BABAM2/RBX1/PSMD14/MAD2L2/CHEK2/CBX3/LCMT1/TRIAP1/AURKAIP1/MIIP/CDT1/PCGF6	24
BP	GO:0006611	protein export from nucleus	24/562	179/18670	9.123*10^-10	6.261*10^-8	5.456*10^-8	EMD/MAGOH/NPM1/RAN/SRSF2/SRSF3/SRSF7/YWHAE/SLBP/AAAS/PABPN1/RAE1/RBM8A/ALYREF/NUTF2/RNPS1/PARK7/CPSF3/MAGOHB/ENY2/NUP37/THOC6/THOC7/SARNP	25
BP	GO:0051168	nuclear export	25/562	194/18670	9.489*10^-10	6.382*10^-8	5.561*10^-8	EMD/MAGOH/NPM1/RAN/SRSF2/SRSF3/SRSF7/YWHAE/SLBP/AAAS/PABPN1/RAE1/RBM8A/ALYREF/NUTF2/RNPS1/AKAP13/PARK7/CPSF3/MAGOHB/ENY2/NUP37/THOC6/THOC7/SARNP	20
BP	GO:0071426	ribonucleoprotein complex export from nucleus	20/562	127/18670	1.346*10^-9	8.874*10^-8	7.733*10^-8	MAGOH/NPM1/RAN/SRSF2/SRSF3/SRSF7/SLBP/AAAS/PABPN1/RAE1/RBM8A/ALYREF/RNPS1/CPSF3/MAGOHB/ENY2/NUP37/THOC6/THOC7/SARNP	20
BP	GO:0071166	ribonucleoprotein complex localization	20/562	128/18670	1.551*10^-9	1.003*10^-7	8.740*10^-8	MAGOH/NPM1/RAN/SRSF2/SRSF3/SRSF7/SLBP/AAAS/PABPN1/RAE1/RBM8A/ALYREF/RNPS1/CPSF3/MAGOHB/ENY2/NUP37/THOC6/THOC7/SARNP	29
BP	GO:0044839	cell cycle G2/M phase transition	29/562	266/18670	2.325*10^-9	1.476*10^-7	1.286*10^-7	CCNB1/CDK1/CETN2/ENSA/NEK2/NPM1/PSMA1/PSMA2/PSMA4/PSMA7/PSMB1/PSMB3/PSMB4/PSMB6/PSMD4/PSMD10/YWHAE/DYNLL1/NAE1/CCNB2/AURKB/BABAM2/RBX1/PSMD14/CHEK2/LCMT1/MTA3/MIIP/HAUS1	20
BP	GO:0006405	RNA export from nucleus	20/562	135/18670	4.028*10^-9	2.509*10^-7	2.186*10^-7	MAGOH/NPM1/RAN/SRSF2/SRSF3/SRSF7/SLBP/AAAS/PABPN1/RAE1/RBM8A/ALYREF/RNPS1/CPSF3/MAGOHB/ENY2/NUP37/THOC6/THOC7/SARNP	24
BP	GO:0050657	nucleic acid transport	24/562	193/18670	4.241*10^-9	2.547*10^-7	2.219*10^-7	CETN2/CETN3/MAGOH/NPM1/RAN/SRSF2/SRSF3/SRSF7/SLBP/AAAS/PABPN1/RAE1/RBM8A/ALYREF/NUTF2/RNPS1/MRPL18/CPSF3/MAGOHB/ENY2/NUP37/THOC6/THOC7/SARNP	24
BP	GO:0050658	RNA transport	24/562	193/18670	4.241*10^-9	2.547*10^-7	2.219*10^-7	CETN2/CETN3/MAGOH/NPM1/RAN/SRSF2/SRSF3/SRSF7/SLBP/AAAS/PABPN1/RAE1/RBM8A/ALYREF/NUTF2/RNPS1/MRPL18/CPSF3/MAGOHB/ENY2/NUP37/THOC6/THOC7/SARNP	17
BP	GO:0031124	mRNA 3'-end processing	17/562	98/18670	5.136*10^-9	3.030*10^-7	2.640*10^-7	CCNB1/MAGOH/SRSF2/SRSF3/SRSF7/SNRPA/SLBP/NELFE/PABPN1/RBM8A/ALYREF/RNPS1/CPSF3/MAGOHB/THOC6/THOC7/SARNP	18
BP	GO:0006406	mRNA export from nucleus	18/562	111/18670	5.566*10^-9	3.173*10^-7	2.765*10^-7	MAGOH/SRSF2/SRSF3/SRSF7/SLBP/AAAS/PABPN1/RAE1/RBM8A/ALYREF/RNPS1/CPSF3/MAGOHB/ENY2/NUP37/THOC6/THOC7/SARNP	18
BP	GO:0071427	mRNA-containing ribonucleoprotein complex export from nucleus	18/562	111/18670	5.566*10^-9	3.173*10^-7	2.765*10^-7	MAGOH/SRSF2/SRSF3/SRSF7/SLBP/AAAS/PABPN1/RAE1/RBM8A/ALYREF/RNPS1/CPSF3/MAGOHB/ENY2/NUP37/THOC6/THOC7/SARNP	24
BP	GO:0051236	establishment of RNA localization	24/562	196/18670	5.781*10^-9	3.240*10^-7	2.824*10^-7	CETN2/CETN3/MAGOH/NPM1/RAN/SRSF2/SRSF3/SRSF7/SLBP/AAAS/PABPN1/RAE1/RBM8A/ALYREF/NUTF2/RNPS1/MRPL18/CPSF3/MAGOHB/ENY2/NUP37/THOC6/THOC7/SARNP	21
BP	GO:0051028	mRNA transport	21/562	152/18670	5.975*10^-9	3.294*10^-7	2.871*10^-7	CETN2/CETN3/MAGOH/SRSF2/SRSF3/SRSF7/SLBP/AAAS/PABPN1/RAE1/RBM8A/ALYREF/NUTF2/RNPS1/CPSF3/MAGOHB/ENY2/NUP37/THOC6/THOC7/SARNP	40
BP	GO:1901987	regulation of cell cycle phase transition	40/562	480/18670	6.654*10^-9	3.569*10^-7	3.110*10^-7	CCNB1/CDK1/CDC20/CETN2/FGF10/MEN1/NEK2/NPM1/PCNA/PSMA1/PSMA2/PSMA4/PSMA7/PSMB1/PSMB3/PSMB4/PSMB6/PSMD4/PSMD10/TFAP4/YWHAE/DYNLL1/NAE1/AURKB/TRIP13/BABAM2/RBX1/PSMD14/MAD2L2/UBE2C/CHEK2/LCMT1/TRIAP1/ANAPC11/MTA3/MIIP/CDT1/TMEM14B/HAUS1/ANAPC16	25
BP	GO:1902749	regulation of cell cycle G2/M phase transition	25/562	213/18670	6.685*10^-9	3.569*10^-7	3.110*10^-7	CCNB1/CDK1/CETN2/NEK2/NPM1/PSMA1/PSMA2/PSMA4/PSMA7/PSMB1/PSMB3/PSMB4/PSMB6/PSMD4/PSMD10/YWHAE/DYNLL1/NAE1/AURKB/BABAM2/RBX1/PSMD14/MTA3/MIIP/HAUS1	16
BP	GO:0043044	ATP-dependent chromatin remodeling	16/562	88/18670	7.171*10^-9	3.768*10^-7	3.284*10^-7	ACTL6A/CENPA/HDAC2/HNRNPC/NASP/NPM1/VPS72/H4C3/H4C5/ITGB3BP/MIS18A/CENPH/ANP32E/CENPX/CENPS/CENPW	27
BP	GO:0000086	G2/M transition of mitotic cell cycle	27/562	247/18670	7.870*10^-9	4.029*10^-7	3.511*10^-7	CCNB1/CDK1/CETN2/ENSA/NEK2/PSMA1/PSMA2/PSMA4/PSMA7/PSMB1/PSMB3/PSMB4/PSMB6/PSMD4/PSMD10/YWHAE/DYNLL1/NAE1/CCNB2/AURKB/RBX1/PSMD14/CHEK2/LCMT1/MTA3/MIIP/HAUS1	15
BP	GO:0061418	regulation of transcription from RNA polymerase II promoter in response to hypoxia	15/562	77/18670	7.907*10^-9	4.029*10^-7	3.511*10^-7	PSMA1/PSMA2/PSMA4/PSMA7/PSMB1/PSMB3/PSMB4/PSMB6/PSMD4/PSMD10/RPS27A/ELOC/ELOB/RBX1/PSMD14	29
BP	GO:0015980	energy derivation by oxidation of organic compounds	29/562	285/18670	1.125*10^-8	5.645*10^-7	4.919*10^-7	CCNB1/CDK1/COX5B/COX6A1/COX6C/COX7B/BLOC1S1/MDH1/NDUFA2/NDUFAB1/NDUFB3/NDUFB4/NDUFB8/NDUFB10/NDUFS5/NDUFS6/NDUFS8/SDHB/UQCRB/UQCRH/COX7A2L/PARK7/UQCR10/NDUFB11/NDUFA12/MTFR2/COA6/UQCRHL/UQCC3	17
BP	GO:0006614	SRP-dependent cotranslational protein targeting to membrane	17/562	105/18670	1.515*10^-8	7.384*10^-7	6.434*10^-7	RPL5/RPL6/RPL24/RPL30/RPL27A/RPL31/RPL35A/RPL37/RPL38/RPL39/RPL36A/RPS7/RPS20/RPS21/RPS24/RPS27A/SRP14	17
BP	GO:1902750	negative regulation of cell cycle G2/M phase transition	17/562	105/18670	1.515*10^-8	7.384*10^-7	6.434*10^-7	CDK1/PSMA1/PSMA2/PSMA4/PSMA7/PSMB1/PSMB3/PSMB4/PSMB6/PSMD4/PSMD10/NAE1/AURKB/BABAM2/RBX1/PSMD14/MIIP	16
BP	GO:0010972	negative regulation of G2/M transition of mitotic cell cycle	16/562	93/18670	1.641*10^-8	7.886*10^-7	6.872*10^-7	CDK1/PSMA1/PSMA2/PSMA4/PSMA7/PSMB1/PSMB3/PSMB4/PSMB6/PSMD4/PSMD10/NAE1/AURKB/RBX1/PSMD14/MIIP	13
BP	GO:0043486	histone exchange	13/562	60/18670	2.050*10^-8	9.712*10^-7	8.463*10^-7	CENPA/NASP/NPM1/VPS72/H4C3/H4C5/ITGB3BP/MIS18A/CENPH/ANP32E/CENPX/CENPS/CENPW	37
BP	GO:1901990	regulation of mitotic cell cycle phase transition	37/562	444/18670	2.492*10^-8	1.164*10^-6	1.014*10^-6	CCNB1/CDK1/CDC20/CETN2/FGF10/NEK2/PCNA/PSMA1/PSMA2/PSMA4/PSMA7/PSMB1/PSMB3/PSMB4/PSMB6/PSMD4/PSMD10/TFAP4/YWHAE/DYNLL1/NAE1/AURKB/TRIP13/RBX1/PSMD14/MAD2L2/UBE2C/CHEK2/LCMT1/TRIAP1/ANAPC11/MTA3/MIIP/CDT1/TMEM14B/HAUS1/ANAPC16	17
BP	GO:0006613	cotranslational protein targeting to membrane	17/562	109/18670	2.698*10^-8	1.228*10^-6	1.070*10^-6	RPL5/RPL6/RPL24/RPL30/RPL27A/RPL31/RPL35A/RPL37/RPL38/RPL39/RPL36A/RPS7/RPS20/RPS21/RPS24/RPS27A/SRP14	23
BP	GO:0010389	regulation of G2/M transition of mitotic cell cycle	23/562	196/18670	2.702*10^-8	1.228*10^-6	1.070*10^-6	CCNB1/CDK1/CETN2/NEK2/PSMA1/PSMA2/PSMA4/PSMA7/PSMB1/PSMB3/PSMB4/PSMB6/PSMD4/PSMD10/YWHAE/DYNLL1/NAE1/AURKB/RBX1/PSMD14/MTA3/MIIP/HAUS1	14
BP	GO:0006283	transcription-coupled nucleotide-excision repair	14/562	73/18670	3.082*10^-8	1.382*10^-6	1.204*10^-6	PCNA/POLR2C/POLR2G/POLR2H/POLR2I/POLR2K/RFC4/RPA3/RPS27A/RBX1/PPIE/COPS5/ISY1/GTF2H5	22
BP	GO:0043487	regulation of RNA stability	22/562	183/18670	3.494*10^-8	1.546*10^-6	1.347*10^-6	DKC1/HNRNPC/NPM1/YBX1/PSMA1/PSMA2/PSMA4/PSMA7/PSMB1/PSMB3/PSMB4/PSMB6/PSMD4/PSMD10/RPS27A/PSMD14/RIDA/TARDBP/EXOSC3/EXOSC1/EXOSC4/EXOSC5	13
BP	GO:0042255	ribosome assembly	13/562	63/18670	3.825*10^-8	1.670*10^-6	1.456*10^-6	NPM1/RPL5/RPL6/RPL24/RPL38/MRPL22/ABT1/MTERF3/MRTO4/MRPL20/BRIX1/MRPL11/RPF2	31
BP	GO:0045930	negative regulation of mitotic cell cycle	31/562	338/18670	4.021*10^-8	1.734*10^-6	1.511*10^-6	CCNB1/CDK1/CDC20/MSH2/PCNA/PSMA1/PSMA2/PSMA4/PSMA7/PSMB1/PSMB3/PSMB4/PSMB6/PSMD4/PSMD10/RPL24/NAA10/NAE1/AURKB/PTTG1/TRIP13/RBX1/PSMD14/MAD2L2/CHEK2/LCMT1/TRIAP1/AURKAIP1/MIIP/CDT1/GADD45GIP1	27
BP	GO:1901988	negative regulation of cell cycle phase transition	27/562	267/18670	4.117*10^-8	1.753*10^-6	1.527*10^-6	CCNB1/CDK1/CDC20/MEN1/PCNA/PSMA1/PSMA2/PSMA4/PSMA7/PSMB1/PSMB3/PSMB4/PSMB6/PSMD4/PSMD10/NAE1/AURKB/TRIP13/BABAM2/RBX1/PSMD14/MAD2L2/CHEK2/LCMT1/TRIAP1/MIIP/CDT1	13
BP	GO:0010257	NADH dehydrogenase complex assembly	13/562	64/18670	4.669*10^-8	1.939*10^-6	1.689*10^-6	NDUFA2/NDUFAB1/NDUFB3/NDUFB4/NDUFB8/NDUFB10/NDUFS5/NDUFS6/NDUFS8/NDUFB11/NDUFAF7/NDUFA12/NDUFAF8	13
BP	GO:0032981	mitochondrial respiratory chain complex I assembly	13/562	64/18670	4.669*10^-8	1.939*10^-6	1.689*10^-6	NDUFA2/NDUFAB1/NDUFB3/NDUFB4/NDUFB8/NDUFB10/NDUFS5/NDUFS6/NDUFS8/NDUFB11/NDUFAF7/NDUFA12/NDUFAF8	11
BP	GO:0034080	CENP-A containing nucleosome assembly	11/562	44/18670	5.194*10^-8	2.104*10^-6	1.833*10^-6	CENPA/NASP/NPM1/H4C3/H4C5/ITGB3BP/MIS18A/CENPH/CENPX/CENPS/CENPW	11
BP	GO:0061641	CENP-A containing chromatin organization	11/562	44/18670	5.194*10^-8	2.104*10^-6	1.833*10^-6	CENPA/NASP/NPM1/H4C3/H4C5/ITGB3BP/MIS18A/CENPH/CENPX/CENPS/CENPW	10
BP	GO:0000291	nuclear-transcribed mRNA catabolic process, exonucleolytic	10/562	35/18670	5.254*10^-8	2.104*10^-6	1.833*10^-6	POLR2G/LSM6/LSM5/LSM4/LSM3/EXOSC3/EXOSC1/EXOSC4/EXOSC5/LSM2	12
BP	GO:0006120	mitochondrial electron transport, NADH to ubiquinone	12/562	55/18670	6.632*10^-8	2.624*10^-6	2.287*10^-6	NDUFA2/NDUFAB1/NDUFB3/NDUFB4/NDUFB8/NDUFB10/NDUFS5/NDUFS6/NDUFS8/PARK7/NDUFB11/NDUFA12	21
BP	GO:0043488	regulation of mRNA stability	21/562	177/18670	8.987*10^-8	3.476*10^-6	3.029*10^-6	HNRNPC/NPM1/YBX1/PSMA1/PSMA2/PSMA4/PSMA7/PSMB1/PSMB3/PSMB4/PSMB6/PSMD4/PSMD10/RPS27A/PSMD14/RIDA/TARDBP/EXOSC3/EXOSC1/EXOSC4/EXOSC5	17
BP	GO:0045047	protein targeting to ER	17/562	118/18670	8.992*10^-8	3.476*10^-6	3.029*10^-6	RPL5/RPL6/RPL24/RPL30/RPL27A/RPL31/RPL35A/RPL37/RPL38/RPL39/RPL36A/RPS7/RPS20/RPS21/RPS24/RPS27A/SRP14	22
BP	GO:0006413	translational initiation	22/562	193/18670	9.136*10^-8	3.491*10^-6	3.042*10^-6	NPM1/POLR2G/RPL5/RPL6/RPL24/RPL30/RPL27A/RPL31/RPL35A/RPL37/RPL38/RPL39/RPL36A/RPS7/RPS20/RPS21/RPS24/RPS27A/EIF3I/EIF2B4/COPS5/EIF2AK1	26
BP	GO:0140014	mitotic nuclear division	26/562	264/18670	1.246*10^-7	4.710*10^-6	4.104*10^-6	BIRC5/CCNB1/CDC20/KIF22/DRG1/NEK2/RAN/RANBP1/RPL24/AAAS/NAA10/AURKB/PTTG1/TRIP13/MAD2L2/TACC3/UBE2C/CHEK2/UBE2S/LCMT1/ANAPC11/AURKAIP1/CDT1/NUF2/PSRC1/KNSTRN	11
BP	GO:0031055	chromatin remodeling at centromere	11/562	48/18670	1.372*10^-7	5.126*10^-6	4.467*10^-6	CENPA/NASP/NPM1/H4C3/H4C5/ITGB3BP/MIS18A/CENPH/CENPX/CENPS/CENPW	25
BP	GO:1901991	negative regulation of mitotic cell cycle phase transition	25/562	248/18670	1.391*10^-7	5.140*10^-6	4.479*10^-6	CCNB1/CDK1/CDC20/PCNA/PSMA1/PSMA2/PSMA4/PSMA7/PSMB1/PSMB3/PSMB4/PSMB6/PSMD4/PSMD10/NAE1/AURKB/TRIP13/RBX1/PSMD14/MAD2L2/CHEK2/LCMT1/TRIAP1/MIIP/CDT1	21
BP	GO:0006338	chromatin remodeling	21/562	182/18670	1.453*10^-7	5.311*10^-6	4.628*10^-6	ACTL6A/CENPA/HDAC2/HMGB3/HNRNPC/NASP/NPM1/SUPT4H1/VPS72/H4C3/H4C5/NPM3/CBX3/ITGB3BP/MIS18A/CENPH/ANP32E/INO80B/CENPX/CENPS/CENPW	17
BP	GO:0072599	establishment of protein localization to endoplasmic reticulum	17/562	122/18670	1.478*10^-7	5.345*10^-6	4.658*10^-6	RPL5/RPL6/RPL24/RPL30/RPL27A/RPL31/RPL35A/RPL37/RPL38/RPL39/RPL36A/RPS7/RPS20/RPS21/RPS24/RPS27A/SRP14	9
BP	GO:0000027	ribosomal large subunit assembly	9/562	30/18670	1.548*10^-7	5.539*10^-6	4.826*10^-6	RPL5/RPL6/RPL24/RPL38/MRTO4/MRPL20/BRIX1/MRPL11/RPF2	22
BP	GO:0061013	regulation of mRNA catabolic process	22/562	199/18670	1.575*10^-7	5.574*10^-6	4.857*10^-6	HNRNPC/NPM1/YBX1/POLR2G/PSMA1/PSMA2/PSMA4/PSMA7/PSMB1/PSMB3/PSMB4/PSMB6/PSMD4/PSMD10/RPS27A/PSMD14/RIDA/TARDBP/EXOSC3/EXOSC1/EXOSC4/EXOSC5	16
BP	GO:0006289	nucleotide-excision repair	16/562	109/18670	1.649*10^-7	5.775*10^-6	5.032*10^-6	CETN2/NTHL1/PCNA/POLR2C/POLR2G/POLR2H/POLR2I/POLR2K/RFC4/RPA3/RPS27A/RBX1/PPIE/COPS5/ISY1/GTF2H5	8
BP	GO:0010499	proteasomal ubiquitin-independent protein catabolic process	8/562	23/18670	2.110*10^-7	7.315*10^-6	6.375*10^-6	PSMA1/PSMA2/PSMA4/PSMA7/PSMB1/PSMB3/PSMB4/PSMB6	12
BP	GO:0006521	regulation of cellular amino acid metabolic process	12/562	62/18670	2.695*10^-7	9.249*10^-6	8.060*10^-6	PSMA1/PSMA2/PSMA4/PSMA7/PSMB1/PSMB3/PSMB4/PSMB6/PSMD4/PSMD10/PSMD14/PARK7	15
BP	GO:0002181	cytoplasmic translation	15/562	100/18670	3.001*10^-7	1.020*10^-5	8.884*10^-6	DRG1/RPL6/RPL24/RPL30/RPL31/RPL35A/RPL38/RPL39/RPL36A/RPS21/CNBP/EIF3I/RPL26L1/TMA7/DPH5	14
BP	GO:0009060	aerobic respiration	14/562	87/18670	3.062*10^-7	1.030*10^-5	8.975*10^-6	COX5B/COX6A1/COX6C/COX7B/BLOC1S1/MDH1/NDUFS8/SDHB/UQCRB/UQCRH/COX7A2L/UQCR10/MTFR2/UQCRHL	24
BP	GO:0015931	nucleobase-containing compound transport	24/562	241/18670	3.099*10^-7	1.032*10^-5	8.991*10^-6	CETN2/CETN3/MAGOH/NPM1/RAN/SRSF2/SRSF3/SRSF7/SLBP/AAAS/PABPN1/RAE1/RBM8A/ALYREF/NUTF2/RNPS1/MRPL18/CPSF3/MAGOHB/ENY2/NUP37/THOC6/THOC7/SARNP	13
BP	GO:0006353	DNA-templated transcription, termination	13/562	75/18670	3.324*10^-7	1.096*10^-5	9.550*10^-6	POLR2H/POLR2K/SMN1/SNRPD3/SNRPE/SNRPF/SNRPG/SLBP/PABPN1/SETX/CPSF3/POLR3K/GTF2H5	9
BP	GO:0043928	exonucleolytic nuclear-transcribed mRNA catabolic process involved in deadenylation-dependent decay	9/562	33/18670	3.850*10^-7	1.257*10^-5	1.095*10^-5	LSM6/LSM5/LSM4/LSM3/EXOSC3/EXOSC1/EXOSC4/EXOSC5/LSM2	11
BP	GO:0000387	spliceosomal snRNP assembly	11/562	53/18670	4.038*10^-7	1.306*10^-5	1.138*10^-5	SMN1/SNRPC/SNRPD1/SNRPD2/SNRPD3/SNRPE/SNRPF/SNRPG/GEMIN2/LSM4/GEMIN6	15
BP	GO:0051983	regulation of chromosome segregation	15/562	103/18670	4.451*10^-7	1.426*10^-5	1.242*10^-5	CCNB1/CDC20/NEK2/NAA10/AURKB/PTTG1/TRIP13/MAD2L2/TACC3/LCMT1/ANAPC11/HDAC8/CDT1/KNSTRN/RMI2	18
BP	GO:0070972	protein localization to endoplasmic reticulum	18/562	147/18670	4.647*10^-7	1.474*10^-5	1.285*10^-5	RPL5/RPL6/RPL24/RPL30/RPL27A/RPL31/RPL35A/RPL37/RPL38/RPL39/RPL36A/RPS7/RPS20/RPS21/RPS24/RPS27A/SRP14/BCAP31	11
BP	GO:0006336	DNA replication-independent nucleosome assembly	11/562	54/18670	4.935*10^-7	1.551*10^-5	1.352*10^-5	CENPA/NASP/NPM1/H4C3/H4C5/ITGB3BP/MIS18A/CENPH/CENPX/CENPS/CENPW	21
BP	GO:0071897	DNA biosynthetic process	21/562	196/18670	5.089*10^-7	1.580*10^-5	1.377*10^-5	DKC1/HNRNPC/MEN1/NEK2/PCNA/PPIA/RFC4/RPA3/RPS27A/CCT3/TYMS/AURKB/PCLAF/MAD2L2/CCT7/CCT4/CCT8/GAR1/POLE4/CHTF18/FAAP20	28
BP	GO:0007059	chromosome segregation	28/562	321/18670	5.122*10^-7	1.580*10^-5	1.377*10^-5	BIRC5/CCNB1/CDC20/KIF22/NEK2/RAN/UBE2I/NAA10/BANF1/AURKB/PTTG1/TRIP13/MAD2L2/TACC3/PMF1/LCMT1/ANAPC11/MIS18A/HDAC8/NUP37/CDT1/NUF2/PSRC1/KNSTRN/RMI2/CENPX/CENPS/CENPW	11
BP	GO:0034724	DNA replication-independent nucleosome organization	11/562	55/18670	6.003*10^-7	1.835*10^-5	1.599*10^-5	CENPA/NASP/NPM1/H4C3/H4C5/ITGB3BP/MIS18A/CENPH/CENPX/CENPS/CENPW	12
BP	GO:0042274	ribosomal small subunit biogenesis	12/562	67/18670	6.525*10^-7	1.977*10^-5	1.723*10^-5	NPM1/RPL38/RPS7/RPS21/RPS24/EMG1/LSM6/NGDN/ABT1/MRPS9/NOL10/TSR2	13
BP	GO:0033045	regulation of sister chromatid segregation	13/562	80/18670	7.211*10^-7	2.163*10^-5	1.885*10^-5	CCNB1/CDC20/NAA10/AURKB/PTTG1/TRIP13/MAD2L2/TACC3/LCMT1/ANAPC11/HDAC8/CDT1/RMI2	11
BP	GO:0034508	centromere complex assembly	11/562	56/18670	7.269*10^-7	2.163*10^-5	1.885*10^-5	CENPA/NASP/NPM1/H4C3/H4C5/ITGB3BP/MIS18A/CENPH/CENPX/CENPS/CENPW	28
BP	GO:0071103	DNA conformation change	28/562	327/18670	7.438*10^-7	2.194*10^-5	1.912*10^-5	CCNB1/CDK1/CENPA/CETN2/H2AX/HMGB3/NASP/NPM1/RFC4/RPS27A/NAA10/H2BC13/H3C12/H4C3/H4C5/BANF1/RBX1/SETX/ITGB3BP/RAD54B/GINS2/MIS18A/CHTF18/CENPH/CENPX/CENPS/CENPW/GTF2H5	13
BP	GO:0033238	regulation of cellular amine metabolic process	13/562	81/18670	8.357*10^-7	2.444*10^-5	2.130*10^-5	HPRT1/PSMA1/PSMA2/PSMA4/PSMA7/PSMB1/PSMB3/PSMB4/PSMB6/PSMD4/PSMD10/PSMD14/PARK7	26
BP	GO:0006310	DNA recombination	26/562	292/18670	8.856*10^-7	2.567*10^-5	2.237*10^-5	ACTL6A/FUS/H2AX/HMGB3/MSH2/RPA3/UNG/SEM1/TRIP13/ALYREF/PSMD14/MAD2L2/RAD51AP1/SETX/RAD54B/EXOSC3/GINS2/AUNIP/INO80B/RHNO1/MND1/RMI2/NSMCE1/CENPX/SWI5/CENPS	19
BP	GO:0007051	spindle organization	19/562	170/18670	9.300*10^-7	2.673*10^-5	2.329*10^-5	BIRC5/CCNB1/CDC20/STMN1/DRG1/NEK2/RAN/AAAS/RAE1/AURKB/TACC3/CHEK2/SAC3D1/AUNIP/NUF2/PSRC1/KNSTRN/HAUS1/CENPW	13
BP	GO:0000245	spliceosomal complex assembly	13/562	84/18670	1.283*10^-6	3.626*10^-5	3.159*10^-5	SMN1/SNRPC/SNRPD1/SNRPD2/SNRPE/SNRPG/GEMIN2/USP39/SF3A3/SETX/RBMX/ISY1/GEMIN6	13
BP	GO:0006368	transcription elongation from RNA polymerase II promoter	13/562	84/18670	1.283*10^-6	3.626*10^-5	3.159*10^-5	POLR2C/POLR2G/POLR2H/POLR2I/POLR2K/SUPT4H1/ELOC/ELOB/NELFE/ADRM1/AFF4/ENY2/GTF2H5	15
BP	GO:0006354	DNA-templated transcription, elongation	15/562	112/18670	1.334*10^-6	3.739*10^-5	3.258*10^-5	POLR2C/POLR2G/POLR2H/POLR2I/POLR2K/SUPT4H1/ELOC/ELOB/NELFE/TSFM/ALYREF/ADRM1/AFF4/ENY2/GTF2H5	25
BP	GO:0031503	protein-containing complex localization	25/562	281/18670	1.457*10^-6	4.049*10^-5	3.528*10^-5	BIRC5/MAGOH/NPM1/RAN/SRSF2/SRSF3/SRSF7/SLBP/AAAS/PABPN1/RAE1/DYNLL1/RBM8A/ALYREF/RNPS1/SNAPIN/HSPB11/CPSF3/MAGOHB/ENY2/NUP37/THOC6/THOC7/DYNLRB1/SARNP	7
BP	GO:0051383	kinetochore organization	7/562	21/18670	1.738*10^-6	4.790*10^-5	4.174*10^-5	CENPA/CENPH/CDT1/NUF2/CENPX/CENPS/CENPW	23
BP	GO:0006302	double-strand break repair	23/562	248/18670	1.887*10^-6	5.117*10^-5	4.459*10^-5	FUS/H2AX/MSH2/RPA3/UBE2V2/SUMO1/SEM1/H4C3/H4C5/TRIP13/BABAM2/PSMD14/MAD2L2/RAD51AP1/CHEK2/SETX/RAD54B/GINS2/AUNIP/ATP23/RMI2/NSMCE1/SWI5	23
BP	GO:0065004	protein-DNA complex assembly	23/562	248/18670	1.887*10^-6	5.117*10^-5	4.459*10^-5	CENPA/CETN2/H2AX/NASP/NPM1/RPA3/RPS27A/H2BC13/H3C12/H4C3/H4C5/RBX1/ITGB3BP/GMNN/MIS18A/CENPH/CDT1/SGF29/CENPX/SWI5/CENPS/CENPW/GTF2H5	14
BP	GO:1990542	mitochondrial transmembrane transport	14/562	101/18670	1.974*10^-6	5.311*10^-5	4.628*10^-5	ATP5F1E/ATP5MC2/ATP5ME/ATP5PF/COX5B/ATP5MF/TIMM17B/TOMM40/ATP5PD/MRPL18/TIMM50/DNAJC19/ROMO1/TIMM23	16
BP	GO:1902850	microtubule cytoskeleton organization involved in mitosis	16/562	131/18670	2.078*10^-6	5.545*10^-5	4.832*10^-5	BIRC5/CCNB1/CDC20/CENPA/FGF10/STMN1/DRG1/NEK2/RAN/AAAS/RAE1/AURKB/TACC3/CHEK2/NUF2/PSRC1	25
BP	GO:0071824	protein-DNA complex subunit organization	25/562	288/18670	2.276*10^-6	6.028*10^-5	5.253*10^-5	CENPA/CETN2/H2AX/NASP/NPM1/RPA3/RPS27A/VPS72/H2BC13/H3C12/H4C3/H4C5/RBX1/ITGB3BP/GMNN/MIS18A/CENPH/ANP32E/CDT1/SGF29/CENPX/SWI5/CENPS/CENPW/GTF2H5	31
BP	GO:0000280	nuclear division	31/562	407/18670	2.346*10^-6	6.163*10^-5	5.371*10^-5	BIRC5/CCNB1/CDC20/CKS2/KIF22/DRG1/NEK2/RAN/RANBP1/RPL24/AAAS/NAA10/AURKB/PTTG1/TRIP13/MAD2L2/TACC3/UBE2C/CHEK2/RAD54B/UBE2S/LCMT1/ANAPC11/AURKAIP1/CDT1/NUF2/MND1/PSRC1/KNSTRN/CENPX/CENPS	32
BP	GO:0051052	regulation of DNA metabolic process	32/562	429/18670	2.516*10^-6	6.558*10^-5	5.715*10^-5	CDK1/DKC1/FGF10/FUS/H2AX/HNRNPC/MEN1/MSH2/NEK2/NPM1/PCNA/RFC4/CCT3/UBE2V2/AURKB/BABAM2/ALYREF/MAD2L2/CCT7/CCT4/RAD51AP1/CCT8/CHEK2/CACYBP/EXOSC3/GMNN/MIS18A/HDAC8/CHTF18/AUNIP/CDT1/RMI2	10
BP	GO:0006301	postreplication repair	10/562	52/18670	2.857*10^-6	7.335*10^-5	6.392*10^-5	MSH2/PCNA/RFC4/RPA3/RPS27A/UBE2V2/PCLAF/MAD2L2/NSMCE1/FAAP20	10
BP	GO:0045839	negative regulation of mitotic nuclear division	10/562	52/18670	2.857*10^-6	7.335*10^-5	6.392*10^-5	CCNB1/CDC20/NAA10/AURKB/PTTG1/TRIP13/MAD2L2/LCMT1/AURKAIP1/CDT1	17
BP	GO:0000070	mitotic sister chromatid segregation	17/562	151/18670	3.129*10^-6	7.972*10^-5	6.947*10^-5	CCNB1/CDC20/KIF22/NEK2/RAN/NAA10/AURKB/PTTG1/TRIP13/MAD2L2/TACC3/LCMT1/ANAPC11/CDT1/NUF2/PSRC1/KNSTRN	7
BP	GO:0042776	mitochondrial ATP synthesis coupled proton transport	7/562	23/18670	3.476*10^-6	8.773*10^-5	7.645*10^-5	ATP5F1E/ATP5MC2/ATP5ME/ATP5PF/COX5B/ATP5MF/ATP5PD	9
BP	GO:0033048	negative regulation of mitotic sister chromatid segregation	9/562	42/18670	3.496*10^-6	8.773*10^-5	7.645*10^-5	CCNB1/CDC20/NAA10/AURKB/PTTG1/TRIP13/MAD2L2/LCMT1/CDT1	14
BP	GO:0007052	mitotic spindle organization	14/562	106/18670	3.544*10^-6	8.829*10^-5	7.694*10^-5	BIRC5/CCNB1/CDC20/STMN1/DRG1/NEK2/RAN/AAAS/RAE1/AURKB/TACC3/CHEK2/NUF2/PSRC1	15
BP	GO:0043618	regulation of transcription from RNA polymerase II promoter in response to stress	15/562	121/18670	3.579*10^-6	8.849*10^-5	7.711*10^-5	PSMA1/PSMA2/PSMA4/PSMA7/PSMB1/PSMB3/PSMB4/PSMB6/PSMD4/PSMD10/RPS27A/ELOC/ELOB/RBX1/PSMD14	31
BP	GO:0043161	proteasome-mediated ubiquitin-dependent protein catabolic process	31/562	419/18670	4.266*10^-6	1.047*10^-4	9.125*10^-5	AUP1/CCNB1/CDK1/CDC20/PCBP2/PSMA1/PSMA2/PSMA4/PSMA7/PSMB1/PSMB3/PSMB4/PSMB6/PSMD4/PSMD10/RPS27A/SEL1L/SUMO2/SUMO1/AURKB/PTTG1/RNF7/RBX1/BCAP31/PSMD14/UBE2C/PARK7/UBE2S/ANAPC11/ANAPC16/COMMD1	6
BP	GO:0045116	protein neddylation	6/562	16/18670	4.485*10^-6	1.093*10^-4	9.523*10^-5	NEDD8/RPL5/NAE1/RNF7/RBX1/COPS9	19
BP	GO:0000819	sister chromatid segregation	19/562	189/18670	4.570*10^-6	1.100*10^-4	9.588*10^-5	CCNB1/CDC20/KIF22/NEK2/RAN/NAA10/AURKB/PTTG1/TRIP13/MAD2L2/TACC3/LCMT1/ANAPC11/HDAC8/CDT1/NUF2/PSRC1/KNSTRN/RMI2	8
BP	GO:0042407	cristae formation	8/562	33/18670	4.580*10^-6	1.100*10^-4	9.588*10^-5	ATP5F1E/ATP5MC2/ATP5ME/ATP5PF/ATP5MF/ATP5PD/APOO/UQCC3	9
BP	GO:0007007	inner mitochondrial membrane organization	9/562	44/18670	5.268*10^-6	1.229*10^-4	1.071*10^-4	ATP5F1E/ATP5MC2/ATP5ME/ATP5PF/ATP5MF/ATP5PD/APOO/ROMO1/UQCC3	9
BP	GO:0033046	negative regulation of sister chromatid segregation	9/562	44/18670	5.268*10^-6	1.229*10^-4	1.071*10^-4	CCNB1/CDC20/NAA10/AURKB/PTTG1/TRIP13/MAD2L2/LCMT1/CDT1	13
BP	GO:0031146	SCF-dependent proteasomal ubiquitin-dependent protein catabolic process	13/562	95/18670	5.289*10^-6	1.229*10^-4	1.071*10^-4	PSMA1/PSMA2/PSMA4/PSMA7/PSMB1/PSMB3/PSMB4/PSMB6/PSMD4/PSMD10/RNF7/RBX1/PSMD14	5
BP	GO:1903405	protein localization to nuclear body	5/562	10/18670	5.398*10^-6	1.229*10^-4	1.071*10^-4	DKC1/CCT3/CCT7/CCT4/CCT8	5
BP	GO:1904851	positive regulation of establishment of protein localization to telomere	5/562	10/18670	5.398*10^-6	1.229*10^-4	1.071*10^-4	DKC1/CCT3/CCT7/CCT4/CCT8	5
BP	GO:1904867	protein localization to Cajal body	5/562	10/18670	5.398*10^-6	1.229*10^-4	1.071*10^-4	DKC1/CCT3/CCT7/CCT4/CCT8	11
BP	GO:0033047	regulation of mitotic sister chromatid segregation	11/562	68/18670	5.399*10^-6	1.229*10^-4	1.071*10^-4	CCNB1/CDC20/NAA10/AURKB/PTTG1/TRIP13/MAD2L2/TACC3/LCMT1/ANAPC11/CDT1	24
BP	GO:0016579	protein deubiquitination	24/562	283/18670	5.408*10^-6	1.229*10^-4	1.071*10^-4	ACTL6A/CDK1/CDC20/NEDD8/PSMA1/PSMA2/PSMA4/PSMA7/PSMB1/PSMB3/PSMB4/PSMB6/PSMD4/PSMD10/RPS27A/BABAM2/PSMD14/STAMBP/USP39/COPS5/ADRM1/PARK7/ENY2/INO80B	12
BP	GO:0034502	protein localization to chromosome	12/562	82/18670	5.981*10^-6	1.350*10^-4	1.176*10^-4	CDK1/CENPA/DKC1/MSH2/CCT3/AURKB/CCT7/CCT4/CCT8/HDAC8/CDT1/SGF29	9
BP	GO:0051985	negative regulation of chromosome segregation	9/562	45/18670	6.410*10^-6	1.437*10^-4	1.252*10^-4	CCNB1/CDC20/NAA10/AURKB/PTTG1/TRIP13/MAD2L2/LCMT1/CDT1	7
BP	GO:0008334	histone mRNA metabolic process	7/562	25/18670	6.468*10^-6	1.439*10^-4	1.254*10^-4	SNRPD3/SNRPE/SNRPF/SNRPG/SLBP/CPSF3/EXOSC4	32
BP	GO:0048285	organelle fission	32/562	449/18670	6.505*10^-6	1.439*10^-4	1.254*10^-4	BIRC5/CCNB1/CDC20/CKS2/KIF22/DRG1/NEK2/RAN/RANBP1/RPL24/AAAS/NAA10/AURKB/PTTG1/TRIP13/MAD2L2/TACC3/UBE2C/CHEK2/RAD54B/UBE2S/LCMT1/ANAPC11/AURKAIP1/CDT1/NUF2/MND1/PSRC1/KNSTRN/MTFR2/CENPX/CENPS	15
BP	GO:0043620	regulation of DNA-templated transcription in response to stress	15/562	127/18670	6.552*10^-6	1.440*10^-4	1.255*10^-4	PSMA1/PSMA2/PSMA4/PSMA7/PSMB1/PSMB3/PSMB4/PSMB6/PSMD4/PSMD10/RPS27A/ELOC/ELOB/RBX1/PSMD14	10
BP	GO:0010965	regulation of mitotic sister chromatid separation	10/562	57/18670	6.814*10^-6	1.488*10^-4	1.297*10^-4	CCNB1/CDC20/AURKB/PTTG1/TRIP13/MAD2L2/TACC3/LCMT1/ANAPC11/CDT1	8
BP	GO:0006369	termination of RNA polymerase II transcription	8/562	35/18670	7.363*10^-6	1.598*10^-4	1.392*10^-4	SNRPD3/SNRPE/SNRPF/SNRPG/SLBP/PABPN1/SETX/CPSF3	7
BP	GO:0015985	energy coupled proton transport, down electrochemical gradient	7/562	26/18670	8.623*10^-6	1.847*10^-4	1.610*10^-4	ATP5F1E/ATP5MC2/ATP5ME/ATP5PF/COX5B/ATP5MF/ATP5PD	7
BP	GO:0015986	ATP synthesis coupled proton transport	7/562	26/18670	8.623*10^-6	1.847*10^-4	1.610*10^-4	ATP5F1E/ATP5MC2/ATP5ME/ATP5PF/COX5B/ATP5MF/ATP5PD	15
BP	GO:0008033	tRNA processing	15/562	130/18670	8.739*10^-6	1.860*10^-4	1.621*10^-4	HSD17B10/METTL1/LAGE3/LSM6/ELP5/TPRKB/POP5/TRMT112/POLR3K/TRIT1/TSEN34/RPP21/THUMPD2/TRPT1/ZBTB8OS	13
BP	GO:0070498	interleukin-1-mediated signaling pathway	13/562	100/18670	9.396*10^-6	1.987*10^-4	1.732*10^-4	PSMA1/PSMA2/PSMA4/PSMA7/PSMB1/PSMB3/PSMB4/PSMB6/PSMD4/PSMD10/RPS27A/RBX1/PSMD14	11
BP	GO:1902036	regulation of hematopoietic stem cell differentiation	11/562	72/18670	9.548*10^-6	2.007*10^-4	1.749*10^-4	PSMA1/PSMA2/PSMA4/PSMA7/PSMB1/PSMB3/PSMB4/PSMB6/PSMD4/PSMD10/PSMD14	5
BP	GO:0070203	regulation of establishment of protein localization to telomere	5/562	11/18670	9.651*10^-6	2.016*10^-4	1.757*10^-4	DKC1/CCT3/CCT7/CCT4/CCT8	22
BP	GO:0006839	mitochondrial transport	22/562	256/18670	1.074*10^-5	2.230*10^-4	1.944*10^-4	ATP5F1E/ATP5MC2/ATP5ME/ATP5PF/COX5B/YWHAE/ZNF205/PDCD5/ATP5MF/TIMM17B/TOMM40/HAX1/ATP5PD/MTX2/MRPL18/TMEM14C/UBL5/TIMM50/DNAJC19/ROMO1/IMMP1L/TIMM23	10
BP	GO:0051306	mitotic sister chromatid separation	10/562	60/18670	1.097*10^-5	2.250*10^-4	1.961*10^-4	CCNB1/CDC20/AURKB/PTTG1/TRIP13/MAD2L2/TACC3/LCMT1/ANAPC11/CDT1	10
BP	GO:0051784	negative regulation of nuclear division	10/562	60/18670	1.097*10^-5	2.250*10^-4	1.961*10^-4	CCNB1/CDC20/NAA10/AURKB/PTTG1/TRIP13/MAD2L2/LCMT1/AURKAIP1/CDT1	9
BP	GO:0043628	ncRNA 3'-end processing	9/562	48/18670	1.120*10^-5	2.282*10^-4	1.988*10^-4	DKC1/FBL/HSD17B10/RPS21/EXOSC3/POLR3K/EXOSC4/EXOSC5/ERI3	7
BP	GO:0000460	maturation of 5.8S rRNA	7/562	27/18670	1.134*10^-5	2.297*10^-4	2.002*10^-4	RPS21/C1D/ABT1/EXOSC3/EXOSC4/ERI3/LAS1L	24
BP	GO:0070646	protein modification by small protein removal	24/562	299/18670	1.367*10^-5	2.753*10^-4	2.399*10^-4	ACTL6A/CDK1/CDC20/NEDD8/PSMA1/PSMA2/PSMA4/PSMA7/PSMB1/PSMB3/PSMB4/PSMB6/PSMD4/PSMD10/RPS27A/BABAM2/PSMD14/STAMBP/USP39/COPS5/ADRM1/PARK7/ENY2/INO80B	6
BP	GO:0016074	snoRNA metabolic process	6/562	19/18670	1.407*10^-5	2.799*10^-4	2.439*10^-4	DKC1/FBL/EXOSC3/GAR1/EXOSC4/EXOSC5	6
BP	GO:0030150	protein import into mitochondrial matrix	6/562	19/18670	1.407*10^-5	2.799*10^-4	2.439*10^-4	TIMM17B/TOMM40/TIMM50/DNAJC19/ROMO1/TIMM23	11
BP	GO:0002479	antigen processing and presentation of exogenous peptide antigen via MHC class I, TAP-dependent	11/562	75/18670	1.426*10^-5	2.822*10^-4	2.459*10^-4	PSMA1/PSMA2/PSMA4/PSMA7/PSMB1/PSMB3/PSMB4/PSMB6/PSMD4/PSMD10/PSMD14	10
BP	GO:1905818	regulation of chromosome separation	10/562	62/18670	1.482*10^-5	2.916*10^-4	2.541*10^-4	CCNB1/CDC20/AURKB/PTTG1/TRIP13/MAD2L2/TACC3/LCMT1/ANAPC11/CDT1	12
BP	GO:0051304	chromosome separation	12/562	90/18670	1.589*10^-5	3.066*10^-4	2.671*10^-4	CCNB1/CDC20/AURKB/PTTG1/TRIP13/MAD2L2/TACC3/LCMT1/ANAPC11/CDT1/CENPX/CENPS	24
BP	GO:0090305	nucleic acid phosphodiester bond hydrolysis	24/562	302/18670	1.613*10^-5	3.066*10^-4	2.671*10^-4	NTHL1/PCNA/POLR2I/RFC4/RPA3/RPS21/RPS27A/RBX1/RIDA/RNASEH2A/ABT1/EXOSC3/EXOSC1/POP5/CPSF3/POLR3K/EXOSC4/EXOSC5/TRIR/ERI3/TSEN34/RPP21/LAS1L/GTF2H5	5
BP	GO:0031126	snoRNA 3'-end processing	5/562	12/18670	1.614*10^-5	3.066*10^-4	2.671*10^-4	DKC1/FBL/EXOSC3/EXOSC4/EXOSC5	5
BP	GO:0070202	regulation of establishment of protein localization to chromosome	5/562	12/18670	1.614*10^-5	3.066*10^-4	2.671*10^-4	DKC1/CCT3/CCT7/CCT4/CCT8	5
BP	GO:1904816	positive regulation of protein localization to chromosome, telomeric region	5/562	12/18670	1.614*10^-5	3.066*10^-4	2.671*10^-4	DKC1/CCT3/CCT7/CCT4/CCT8	5
BP	GO:1990173	protein localization to nucleoplasm	5/562	12/18670	1.614*10^-5	3.066*10^-4	2.671*10^-4	DKC1/CCT3/CCT7/CCT4/CCT8	16
BP	GO:0090501	RNA phosphodiester bond hydrolysis	16/562	154/18670	1.695*10^-5	3.202*10^-4	2.791*10^-4	POLR2I/RPS21/RIDA/RNASEH2A/ABT1/EXOSC3/EXOSC1/POP5/CPSF3/POLR3K/EXOSC4/EXOSC5/TRIR/ERI3/TSEN34/RPP21	8
BP	GO:2000816	negative regulation of mitotic sister chromatid separation	8/562	39/18670	1.731*10^-5	3.252*10^-4	2.834*10^-4	CCNB1/CDC20/AURKB/PTTG1/TRIP13/MAD2L2/LCMT1/CDT1	20
BP	GO:0006457	protein folding	20/562	227/18670	1.869*10^-5	3.492*10^-4	3.043*10^-4	CSNK2B/HSPE1/PFDN1/PFDN2/PFDN4/PFDN5/PPIA/TBCA/CCT3/VBP1/PDCD5/PPIE/PPIH/PFDN6/CCT7/CCT4/CCT8/PDCL3/DNAJC19/NUDCD2	20
BP	GO:0051054	positive regulation of DNA metabolic process	20/562	228/18670	1.992*10^-5	3.702*10^-4	3.226*10^-4	CDK1/DKC1/FGF10/FUS/H2AX/MSH2/NEK2/PCNA/RFC4/CCT3/AURKB/BABAM2/MAD2L2/CCT7/CCT4/CCT8/CACYBP/EXOSC3/CHTF18/CDT1	30
BP	GO:0006605	protein targeting	30/562	432/18670	2.072*10^-5	3.811*10^-4	3.321*10^-4	MPV17/RPL5/RPL6/RPL24/RPL30/RPL27A/RPL31/RPL35A/RPL37/RPL38/RPL39/RPL36A/RPS7/RPS20/RPS21/RPS24/RPS27A/SRP14/YWHAE/PDCD5/TIMM17B/TOMM40/HAX1/VPS13C/UBL5/TIMM50/DNAJC19/ROMO1/IMMP1L/TIMM23	22
BP	GO:0072331	signal transduction by p53 class mediator	22/562	267/18670	2.074*10^-5	3.811*10^-4	3.321*10^-4	CCNB1/CDK1/CSNK2B/HDAC2/MSH2/PCNA/PSMD10/RFC4/RPA3/RPL5/RPS7/TFAP4/AURKB/EEF1E1/CHEK2/TRIAP1/PAK1IP1/EDA2R/MEAF6/RHNO1/RPF2/RMI2	8
BP	GO:1905819	negative regulation of chromosome separation	8/562	40/18670	2.107*10^-5	3.852*10^-4	3.356*10^-4	CCNB1/CDC20/AURKB/PTTG1/TRIP13/MAD2L2/LCMT1/CDT1	17
BP	GO:0032200	telomere organization	17/562	175/18670	2.254*10^-5	4.097*10^-4	3.570*10^-4	DKC1/HNRNPC/NEK2/PCNA/RFC4/RPA3/CCT3/H3C12/H4C3/H4C5/AURKB/CCT7/CCT4/CCT8/GAR1/HDAC8/POLE4	18
BP	GO:0006399	tRNA metabolic process	18/562	193/18670	2.269*10^-5	4.102*10^-4	3.575*10^-4	DARS1/HSD17B10/METTL1/LAGE3/EEF1E1/LSM6/ELP5/TPRKB/EXOSC3/POP5/TRMT112/POLR3K/TRIT1/TSEN34/RPP21/THUMPD2/TRPT1/ZBTB8OS	11
BP	GO:0042590	antigen processing and presentation of exogenous peptide antigen via MHC class I	11/562	79/18670	2.361*10^-5	4.246*10^-4	3.700*10^-4	PSMA1/PSMA2/PSMA4/PSMA7/PSMB1/PSMB3/PSMB4/PSMB6/PSMD4/PSMD10/PSMD14	8
BP	GO:0050434	positive regulation of viral transcription	8/562	41/18670	2.550*10^-5	4.561*10^-4	3.975*10^-4	POLR2C/POLR2G/POLR2H/POLR2I/POLR2K/SUPT4H1/TFAP4/NELFE	9
BP	GO:0007091	metaphase/anaphase transition of mitotic cell cycle	9/562	54/18670	3.024*10^-5	5.380*10^-4	4.688*10^-4	CCNB1/CDC20/AURKB/TRIP13/MAD2L2/TACC3/LCMT1/ANAPC11/CDT1	12
BP	GO:0002474	antigen processing and presentation of peptide antigen via MHC class I	12/562	96/18670	3.078*10^-5	5.448*10^-4	4.747*10^-4	PSMA1/PSMA2/PSMA4/PSMA7/PSMB1/PSMB3/PSMB4/PSMB6/PSMD4/PSMD10/BCAP31/PSMD14	16
BP	GO:0000723	telomere maintenance	16/562	162/18670	3.184*10^-5	5.606*10^-4	4.885*10^-4	DKC1/HNRNPC/NEK2/PCNA/RFC4/RPA3/CCT3/H4C3/H4C5/AURKB/CCT7/CCT4/CCT8/GAR1/HDAC8/POLE4	6
BP	GO:1904666	regulation of ubiquitin protein ligase activity	6/562	22/18670	3.581*10^-5	6.273*10^-4	5.466*10^-4	CDC20/RPL5/RPS7/MAD2L2/UBE2C/UBE2S	16
BP	GO:0007088	regulation of mitotic nuclear division	16/562	164/18670	3.702*10^-5	6.450*10^-4	5.621*10^-4	CCNB1/CDC20/DRG1/NEK2/RANBP1/NAA10/AURKB/PTTG1/TRIP13/MAD2L2/TACC3/UBE2C/LCMT1/ANAPC11/AURKAIP1/CDT1	11
BP	GO:0060218	hematopoietic stem cell differentiation	11/562	83/18670	3.784*10^-5	6.560*10^-4	5.716*10^-4	PSMA1/PSMA2/PSMA4/PSMA7/PSMB1/PSMB3/PSMB4/PSMB6/PSMD4/PSMD10/PSMD14	5
BP	GO:0043144	snoRNA processing	5/562	14/18670	3.879*10^-5	6.656*10^-4	5.800*10^-4	DKC1/FBL/EXOSC3/EXOSC4/EXOSC5	5
BP	GO:1904814	regulation of protein localization to chromosome, telomeric region	5/562	14/18670	3.879*10^-5	6.656*10^-4	5.800*10^-4	DKC1/CCT3/CCT7/CCT4/CCT8	9
BP	GO:0044784	metaphase/anaphase transition of cell cycle	9/562	56/18670	4.084*10^-5	6.971*10^-4	6.075*10^-4	CCNB1/CDC20/AURKB/TRIP13/MAD2L2/TACC3/LCMT1/ANAPC11/CDT1	11
BP	GO:1901532	regulation of hematopoietic progenitor cell differentiation	11/562	85/18670	4.738*10^-5	8.047*10^-4	7.012*10^-4	PSMA1/PSMA2/PSMA4/PSMA7/PSMB1/PSMB3/PSMB4/PSMB6/PSMD4/PSMD10/PSMD14	21
BP	GO:0098813	nuclear chromosome segregation	21/562	262/18670	4.767*10^-5	8.056*10^-4	7.020*10^-4	CCNB1/CDC20/KIF22/NEK2/RAN/NAA10/AURKB/PTTG1/TRIP13/MAD2L2/TACC3/LCMT1/ANAPC11/HDAC8/CDT1/NUF2/PSRC1/KNSTRN/RMI2/CENPX/CENPS	31
BP	GO:0010498	proteasomal protein catabolic process	31/562	477/18670	5.361*10^-5	9.015*10^-4	7.856*10^-4	AUP1/CCNB1/CDK1/CDC20/PCBP2/PSMA1/PSMA2/PSMA4/PSMA7/PSMB1/PSMB3/PSMB4/PSMB6/PSMD4/PSMD10/RPS27A/SEL1L/SUMO2/SUMO1/AURKB/PTTG1/RNF7/RBX1/BCAP31/PSMD14/UBE2C/PARK7/UBE2S/ANAPC11/ANAPC16/COMMD1	5
BP	GO:0006122	mitochondrial electron transport, ubiquinol to cytochrome c	5/562	15/18670	5.675*10^-5	9.251*10^-4	8.062*10^-4	UQCRB/UQCRH/UQCR10/UQCRHL/UQCC3	5
BP	GO:1904874	positive regulation of telomerase RNA localization to Cajal body	5/562	15/18670	5.675*10^-5	9.251*10^-4	8.062*10^-4	DKC1/CCT3/CCT7/CCT4/CCT8	7
BP	GO:0007094	mitotic spindle assembly checkpoint	7/562	34/18670	5.722*10^-5	9.251*10^-4	8.062*10^-4	CCNB1/CDC20/AURKB/TRIP13/MAD2L2/LCMT1/CDT1	7
BP	GO:0017004	cytochrome complex assembly	7/562	34/18670	5.722*10^-5	9.251*10^-4	8.062*10^-4	UQCRB/COX17/UQCR10/UQCC2/COA6/UQCC3/PET100	7
BP	GO:0031577	spindle checkpoint	7/562	34/18670	5.722*10^-5	9.251*10^-4	8.062*10^-4	CCNB1/CDC20/AURKB/TRIP13/MAD2L2/LCMT1/CDT1	7
BP	GO:0032212	positive regulation of telomere maintenance via telomerase	7/562	34/18670	5.722*10^-5	9.251*10^-4	8.062*10^-4	DKC1/NEK2/CCT3/AURKB/CCT7/CCT4/CCT8	7
BP	GO:0071173	spindle assembly checkpoint	7/562	34/18670	5.722*10^-5	9.251*10^-4	8.062*10^-4	CCNB1/CDC20/AURKB/TRIP13/MAD2L2/LCMT1/CDT1	7
BP	GO:0071174	mitotic spindle checkpoint	7/562	34/18670	5.722*10^-5	9.251*10^-4	8.062*10^-4	CCNB1/CDC20/AURKB/TRIP13/MAD2L2/LCMT1/CDT1	14
BP	GO:0000725	recombinational repair	14/562	135/18670	5.759*10^-5	9.267*10^-4	8.075*10^-4	FUS/H2AX/RPA3/SEM1/PSMD14/MAD2L2/RAD51AP1/RAD54B/GINS2/AUNIP/RHNO1/RMI2/NSMCE1/SWI5	18
BP	GO:0006323	DNA packaging	18/562	210/18670	6.926*10^-5	1.109*10^-3	9.665*10^-4	CCNB1/CDK1/CENPA/H2AX/NASP/NPM1/NAA10/H2BC13/H3C12/H4C3/H4C5/BANF1/ITGB3BP/MIS18A/CENPH/CENPX/CENPS/CENPW	10
BP	GO:1900182	positive regulation of protein localization to nucleus	10/562	74/18670	7.170*10^-5	1.143*10^-3	9.959*10^-4	CDK1/DKC1/RAN/CCT3/NUTF2/CCT7/CCT4/CCT8/PARK7/TARDBP	6
BP	GO:0070199	establishment of protein localization to chromosome	6/562	25/18670	7.871*10^-5	1.249*10^-3	1.088*10^-3	DKC1/CCT3/CCT7/CCT4/CCT8/SGF29	5
BP	GO:0051382	kinetochore assembly	5/562	16/18670	8.051*10^-5	1.265*10^-3	1.102*10^-3	CENPA/CENPH/CENPX/CENPS/CENPW	5
BP	GO:0070200	establishment of protein localization to telomere	5/562	16/18670	8.051*10^-5	1.265*10^-3	1.102*10^-3	DKC1/CCT3/CCT7/CCT4/CCT8	7
BP	GO:0045841	negative regulation of mitotic metaphase/anaphase transition	7/562	36/18670	8.428*10^-5	1.318*10^-3	1.149*10^-3	CCNB1/CDC20/AURKB/TRIP13/MAD2L2/LCMT1/CDT1	21
BP	GO:0006260	DNA replication	21/562	274/18670	9.069*10^-5	1.412*10^-3	1.230*10^-3	CDK1/FGF10/NASP/PCNA/RFC4/RPA3/SLBP/PCLAF/ALYREF/RNASEH2A/CHEK2/CACYBP/GMNN/GINS2/POLE4/CHTF18/CDT1/RHNO1/RMI2/CENPX/CENPS	10
BP	GO:0000288	nuclear-transcribed mRNA catabolic process, deadenylation-dependent decay	10/562	77/18670	1.010*10^-4	1.541*10^-3	1.343*10^-3	POLR2G/LSM6/LSM5/LSM4/LSM3/EXOSC3/EXOSC1/EXOSC4/EXOSC5/LSM2	10
BP	GO:0006278	RNA-dependent DNA biosynthetic process	10/562	77/18670	1.010*10^-4	1.541*10^-3	1.343*10^-3	DKC1/HNRNPC/NEK2/PPIA/CCT3/AURKB/CCT7/CCT4/CCT8/GAR1	7
BP	GO:0006296	nucleotide-excision repair, DNA incision, 5'-to lesion	7/562	37/18670	1.013*10^-4	1.541*10^-3	1.343*10^-3	NTHL1/PCNA/RFC4/RPA3/RPS27A/RBX1/GTF2H5	7
BP	GO:1902100	negative regulation of metaphase/anaphase transition of cell cycle	7/562	37/18670	1.013*10^-4	1.541*10^-3	1.343*10^-3	CCNB1/CDC20/AURKB/TRIP13/MAD2L2/LCMT1/CDT1	7
BP	GO:1904358	positive regulation of telomere maintenance via telomere lengthening	7/562	37/18670	1.013*10^-4	1.541*10^-3	1.343*10^-3	DKC1/NEK2/CCT3/AURKB/CCT7/CCT4/CCT8	16
BP	GO:1901796	regulation of signal transduction by p53 class mediator	16/562	180/18670	1.131*10^-4	1.714*10^-3	1.493*10^-3	CSNK2B/HDAC2/PSMD10/RFC4/RPA3/RPL5/RPS7/AURKB/EEF1E1/CHEK2/TRIAP1/PAK1IP1/MEAF6/RHNO1/RPF2/RMI2	9
BP	GO:0046782	regulation of viral transcription	9/562	64/18670	1.199*10^-4	1.809*10^-3	1.576*10^-3	POLR2C/POLR2G/POLR2H/POLR2I/POLR2K/SUPT4H1/TFAP4/NELFE/TARDBP	14
BP	GO:0006334	nucleosome assembly	14/562	145/18670	1.251*10^-4	1.879*10^-3	1.637*10^-3	CENPA/H2AX/NASP/NPM1/H2BC13/H3C12/H4C3/H4C5/ITGB3BP/MIS18A/CENPH/CENPX/CENPS/CENPW	8
BP	GO:0030071	regulation of mitotic metaphase/anaphase transition	8/562	51/18670	1.305*10^-4	1.950*10^-3	1.700*10^-3	CCNB1/CDC20/AURKB/TRIP13/MAD2L2/LCMT1/ANAPC11/CDT1	17
BP	GO:0006612	protein targeting to membrane	17/562	202/18670	1.367*10^-4	2.034*10^-3	1.773*10^-3	RPL5/RPL6/RPL24/RPL30/RPL27A/RPL31/RPL35A/RPL37/RPL38/RPL39/RPL36A/RPS7/RPS20/RPS21/RPS24/RPS27A/SRP14	13
BP	GO:0044106	cellular amine metabolic process	13/562	129/18670	1.407*10^-4	2.085*10^-3	1.817*10^-3	HPRT1/PSMA1/PSMA2/PSMA4/PSMA7/PSMB1/PSMB3/PSMB4/PSMB6/PSMD4/PSMD10/PSMD14/PARK7	7
BP	GO:0033683	nucleotide-excision repair, DNA incision	7/562	39/18670	1.436*10^-4	2.109*10^-3	1.838*10^-3	NTHL1/PCNA/RFC4/RPA3/RPS27A/RBX1/GTF2H5	7
BP	GO:0042769	DNA damage response, detection of DNA damage	7/562	39/18670	1.436*10^-4	2.109*10^-3	1.838*10^-3	PCNA/RFC4/RPA3/RPS27A/RBX1/MRPS26/MRPS9	16
BP	GO:0034728	nucleosome organization	16/562	184/18670	1.462*10^-4	2.138*10^-3	1.863*10^-3	CENPA/H2AX/NASP/NPM1/VPS72/H2BC13/H3C12/H4C3/H4C5/ITGB3BP/MIS18A/CENPH/ANP32E/CENPX/CENPS/CENPW	5
BP	GO:1904872	regulation of telomerase RNA localization to Cajal body	5/562	18/18670	1.502*10^-4	2.187*10^-3	1.906*10^-3	DKC1/CCT3/CCT7/CCT4/CCT8	9
BP	GO:2000573	positive regulation of DNA biosynthetic process	9/562	67/18670	1.719*10^-4	2.476*10^-3	2.158*10^-3	DKC1/NEK2/RFC4/CCT3/AURKB/CCT7/CCT4/CCT8/CHTF18	8
BP	GO:0036297	interstrand cross-link repair	8/562	53/18670	1.723*10^-4	2.476*10^-3	2.158*10^-3	RPA3/RPS27A/RAD51AP1/UBE2T/FAAP24/FAAP20/CENPX/CENPS	8
BP	GO:1902099	regulation of metaphase/anaphase transition of cell cycle	8/562	53/18670	1.723*10^-4	2.476*10^-3	2.158*10^-3	CCNB1/CDC20/AURKB/TRIP13/MAD2L2/LCMT1/ANAPC11/CDT1	17
BP	GO:0071456	cellular response to hypoxia	17/562	207/18670	1.836*10^-4	2.627*10^-3	2.289*10^-3	CCNB1/PSMA1/PSMA2/PSMA4/PSMA7/PSMB1/PSMB3/PSMB4/PSMB6/PSMD4/PSMD10/RPS27A/ELOC/ELOB/RBX1/PSMD14/CHCHD2	16
BP	GO:0051783	regulation of nuclear division	16/562	188/18670	1.875*10^-4	2.672*10^-3	2.328*10^-3	CCNB1/CDC20/DRG1/NEK2/RANBP1/NAA10/AURKB/PTTG1/TRIP13/MAD2L2/TACC3/UBE2C/LCMT1/ANAPC11/AURKAIP1/CDT1	8
BP	GO:0032210	regulation of telomere maintenance via telomerase	8/562	54/18670	1.970*10^-4	2.769*10^-3	2.413*10^-3	DKC1/HNRNPC/NEK2/CCT3/AURKB/CCT7/CCT4/CCT8	5
BP	GO:0090670	RNA localization to Cajal body	5/562	19/18670	1.989*10^-4	2.769*10^-3	2.413*10^-3	DKC1/CCT3/CCT7/CCT4/CCT8	5
BP	GO:0090671	telomerase RNA localization to Cajal body	5/562	19/18670	1.989*10^-4	2.769*10^-3	2.413*10^-3	DKC1/CCT3/CCT7/CCT4/CCT8	5
BP	GO:0090672	telomerase RNA localization	5/562	19/18670	1.989*10^-4	2.769*10^-3	2.413*10^-3	DKC1/CCT3/CCT7/CCT4/CCT8	5
BP	GO:0090685	RNA localization to nucleus	5/562	19/18670	1.989*10^-4	2.769*10^-3	2.413*10^-3	DKC1/CCT3/CCT7/CCT4/CCT8	7
BP	GO:0019985	translesion synthesis	7/562	41/18670	1.993*10^-4	2.769*10^-3	2.413*10^-3	PCNA/RFC4/RPA3/RPS27A/PCLAF/MAD2L2/FAAP20	13
BP	GO:0000724	double-strand break repair via homologous recombination	13/562	134/18670	2.062*10^-4	2.842*10^-3	2.477*10^-3	FUS/H2AX/RPA3/SEM1/PSMD14/MAD2L2/RAD51AP1/RAD54B/GINS2/AUNIP/RMI2/NSMCE1/SWI5	13
BP	GO:0007006	mitochondrial membrane organization	13/562	134/18670	2.062*10^-4	2.842*10^-3	2.477*10^-3	ATP5F1E/ATP5MC2/ATP5ME/ATP5PF/YWHAE/ZNF205/PDCD5/ATP5MF/ATP5PD/APOO/TIMM50/ROMO1/UQCC3	17
BP	GO:0030178	negative regulation of Wnt signaling pathway	17/562	210/18670	2.179*10^-4	2.992*10^-3	2.607*10^-3	EMD/LRP1/PFDN5/PSMA1/PSMA2/PSMA4/PSMA7/PSMB1/PSMB3/PSMB4/PSMB6/PSMD4/PSMD10/RBX1/PSMD14/MAD2L2/CBY1	14
BP	GO:0006261	DNA-dependent DNA replication	14/562	153/18670	2.208*10^-4	3.018*10^-3	2.630*10^-3	PCNA/RFC4/RPA3/SLBP/ALYREF/RNASEH2A/CHEK2/GMNN/GINS2/POLE4/CHTF18/CDT1/CENPX/CENPS	13
BP	GO:0043484	regulation of RNA splicing	13/562	135/18670	2.221*10^-4	3.023*10^-3	2.635*10^-3	FUS/MAGOH/SRSF2/SRSF3/SRSF7/PRDX6/RBM8A/PQBP1/SF3B4/RNPS1/SETX/RBMX/AHNAK	9
BP	GO:0007004	telomere maintenance via telomerase	9/562	70/18670	2.414*10^-4	3.273*10^-3	2.852*10^-3	DKC1/HNRNPC/NEK2/CCT3/AURKB/CCT7/CCT4/CCT8/GAR1	10
BP	GO:0006303	double-strand break repair via nonhomologous end joining	10/562	86/18670	2.561*10^-4	3.455*10^-3	3.011*10^-3	H2AX/UBE2V2/SUMO1/H4C3/H4C5/BABAM2/PSMD14/MAD2L2/AUNIP/ATP23	13
BP	GO:0050684	regulation of mRNA processing	13/562	137/18670	2.569*10^-4	3.455*10^-3	3.011*10^-3	CCNB1/MAGOH/SRSF2/SRSF3/SRSF7/SNRPA/NELFE/PABPN1/PRDX6/RBM8A/SF3B4/RNPS1/RBMX	5
BP	GO:0042276	error-prone translesion synthesis	5/562	20/18670	2.586*10^-4	3.465*10^-3	3.019*10^-3	PCNA/RFC4/RPA3/RPS27A/MAD2L2	24
BP	GO:0043687	post-translational protein modification	24/562	361/18670	2.628*10^-4	3.507*10^-3	3.056*10^-3	MEN1/NEDD8/PSMA1/PSMA2/PSMA4/PSMA7/PSMB1/PSMB3/PSMB4/PSMB6/PSMD4/PSMD10/RAB13/ELOC/ELOB/NAE1/RNF7/RBX1/PSMD14/COPS5/ASB3/LCMT1/FEM1C/COMMD1	13
BP	GO:0009308	amine metabolic process	13/562	138/18670	2.760*10^-4	3.668*10^-3	3.196*10^-3	HPRT1/PSMA1/PSMA2/PSMA4/PSMA7/PSMB1/PSMB3/PSMB4/PSMB6/PSMD4/PSMD10/PSMD14/PARK7	6
BP	GO:0009394	2'-deoxyribonucleotide metabolic process	6/562	31/18670	2.807*10^-4	3.717*10^-3	3.239*10^-3	DGUOK/NUDT1/NTHL1/TYMS/UNG/SMUG1	17
BP	GO:0000075	cell cycle checkpoint	17/562	216/18670	3.038*10^-4	4.007*10^-3	3.492*10^-3	CCNB1/CDK1/CDC20/H2AX/MSH2/PCNA/RPL24/NAE1/AURKB/TRIP13/BABAM2/MAD2L2/CHEK2/LCMT1/TRIAP1/CDT1/RHNO1	17
BP	GO:0036294	cellular response to decreased oxygen levels	17/562	217/18670	3.207*10^-4	4.213*10^-3	3.671*10^-3	CCNB1/PSMA1/PSMA2/PSMA4/PSMA7/PSMB1/PSMB3/PSMB4/PSMB6/PSMD4/PSMD10/RPS27A/ELOC/ELOB/RBX1/PSMD14/CHCHD2	15
BP	GO:0090090	negative regulation of canonical Wnt signaling pathway	15/562	178/18670	3.281*10^-4	4.294*10^-3	3.742*10^-3	EMD/PFDN5/PSMA1/PSMA2/PSMA4/PSMA7/PSMB1/PSMB3/PSMB4/PSMB6/PSMD4/PSMD10/RBX1/PSMD14/MAD2L2	5
BP	GO:0006123	mitochondrial electron transport, cytochrome c to oxygen	5/562	21/18670	3.311*10^-4	4.299*10^-3	3.746*10^-3	COX5B/COX6A1/COX6C/COX7B/COX7A2L	5
BP	GO:0019646	aerobic electron transport chain	5/562	21/18670	3.311*10^-4	4.299*10^-3	3.746*10^-3	COX5B/COX6A1/COX6C/COX7B/COX7A2L	6
BP	GO:0008608	attachment of spindle microtubules to kinetochore	6/562	32/18670	3.368*10^-4	4.356*10^-3	3.796*10^-3	CCNB1/NEK2/AURKB/CDT1/NUF2/KNSTRN	11
BP	GO:0048524	positive regulation of viral process	11/562	107/18670	3.797*10^-4	4.893*10^-3	4.264*10^-3	POLR2C/POLR2G/POLR2H/POLR2I/POLR2K/PPIA/SUPT4H1/TFAP4/NELFE/PPIE/PPIH	6
BP	GO:0006370	7-methylguanosine mRNA capping	6/562	33/18670	4.013*10^-4	5.131*10^-3	4.471*10^-3	POLR2C/POLR2G/POLR2H/POLR2I/POLR2K/GTF2H5	6
BP	GO:0019692	deoxyribose phosphate metabolic process	6/562	33/18670	4.013*10^-4	5.131*10^-3	4.471*10^-3	DGUOK/NUDT1/NTHL1/TYMS/UNG/SMUG1	11
BP	GO:0060071	Wnt signaling pathway, planar cell polarity pathway	11/562	108/18670	4.116*10^-4	5.223*10^-3	4.551*10^-3	PSMA1/PSMA2/PSMA4/PSMA7/PSMB1/PSMB3/PSMB4/PSMB6/PSMD4/PSMD10/PSMD14	11
BP	GO:2000278	regulation of DNA biosynthetic process	11/562	108/18670	4.116*10^-4	5.223*10^-3	4.551*10^-3	DKC1/HNRNPC/MEN1/NEK2/RFC4/CCT3/AURKB/CCT7/CCT4/CCT8/CHTF18	8
BP	GO:0033260	nuclear DNA replication	8/562	60/18670	4.137*10^-4	5.231*10^-3	4.558*10^-3	PCNA/RFC4/RPA3/SLBP/CHEK2/GMNN/POLE4/CDT1	7
BP	GO:0030490	maturation of SSU-rRNA	7/562	46/18670	4.167*10^-4	5.248*10^-3	4.573*10^-3	RPS21/LSM6/NGDN/ABT1/MRPS9/NOL10/TSR2	9
BP	GO:0000380	alternative mRNA splicing, via spliceosome	9/562	76/18670	4.509*10^-4	5.658*10^-3	4.930*10^-3	MAGOH/SRSF2/SRSF3/SRSF7/RBM8A/PQBP1/RNPS1/RBMX/SCNM1	4
BP	GO:0043248	proteasome assembly	4/562	13/18670	4.677*10^-4	5.847*10^-3	5.095*10^-3	PSMD4/PSMD10/PSMG1/ADRM1	6
BP	GO:0009452	7-methylguanosine RNA capping	6/562	34/18670	4.750*10^-4	5.894*10^-3	5.136*10^-3	POLR2C/POLR2G/POLR2H/POLR2I/POLR2K/GTF2H5	6
BP	GO:0036260	RNA capping	6/562	34/18670	4.750*10^-4	5.894*10^-3	5.136*10^-3	POLR2C/POLR2G/POLR2H/POLR2I/POLR2K/GTF2H5	14
BP	GO:0007093	mitotic cell cycle checkpoint	14/562	165/18670	4.791*10^-4	5.902*10^-3	5.143*10^-3	CCNB1/CDK1/CDC20/MSH2/PCNA/RPL24/NAE1/AURKB/TRIP13/MAD2L2/CHEK2/LCMT1/TRIAP1/CDT1	14
BP	GO:0031497	chromatin assembly	14/562	165/18670	4.791*10^-4	5.902*10^-3	5.143*10^-3	CENPA/H2AX/NASP/NPM1/H2BC13/H3C12/H4C3/H4C5/ITGB3BP/MIS18A/CENPH/CENPX/CENPS/CENPW	11
BP	GO:0090175	regulation of establishment of planar polarity	11/562	110/18670	4.819*10^-4	5.915*10^-3	5.155*10^-3	PSMA1/PSMA2/PSMA4/PSMA7/PSMB1/PSMB3/PSMB4/PSMB6/PSMD4/PSMD10/PSMD14	8
BP	GO:1904356	regulation of telomere maintenance via telomere lengthening	8/562	62/18670	5.187*10^-4	6.344*10^-3	5.528*10^-3	DKC1/HNRNPC/NEK2/CCT3/AURKB/CCT7/CCT4/CCT8	10
BP	GO:0000726	non-recombinational repair	10/562	94/18670	5.278*10^-4	6.431*10^-3	5.604*10^-3	H2AX/UBE2V2/SUMO1/H4C3/H4C5/BABAM2/PSMD14/MAD2L2/AUNIP/ATP23	6
BP	GO:0000462	maturation of SSU-rRNA from tricistronic rRNA transcript (SSU-rRNA, 5.8S rRNA, LSU-rRNA)	6/562	35/18670	5.588*10^-4	6.760*10^-3	5.891*10^-3	RPS21/NGDN/ABT1/MRPS9/NOL10/TSR2	6
BP	GO:0009262	deoxyribonucleotide metabolic process	6/562	35/18670	5.588*10^-4	6.760*10^-3	5.891*10^-3	DGUOK/NUDT1/NTHL1/TYMS/UNG/SMUG1	11
BP	GO:0002223	stimulatory C-type lectin receptor signaling pathway	11/562	113/18670	6.062*10^-4	7.281*10^-3	6.345*10^-3	PSMA1/PSMA2/PSMA4/PSMA7/PSMB1/PSMB3/PSMB4/PSMB6/PSMD4/PSMD10/PSMD14	11
BP	GO:0060964	regulation of gene silencing by miRNA	11/562	113/18670	6.062*10^-4	7.281*10^-3	6.345*10^-3	POLR2C/POLR2G/POLR2H/POLR2I/POLR2K/AAAS/H3C12/H4C3/H4C5/RAE1/NUP37	6
BP	GO:0000154	rRNA modification	6/562	36/18670	6.538*10^-4	7.824*10^-3	6.818*10^-3	DKC1/FBL/EMG1/MRM2/TRMT112/GAR1	17
BP	GO:1903320	regulation of protein modification by small protein conjugation or removal	17/562	231/18670	6.569*10^-4	7.833*10^-3	6.826*10^-3	CDC20/PSMD10/RPL5/RPS7/UBE2I/MAD2L2/UBE2C/PARK7/UBE2S/TBC1D7/HDAC8/PRR7/COPS9/COMMD1/CENPX/SVBP/CENPS	15
BP	GO:0006333	chromatin assembly or disassembly	15/562	191/18670	6.901*10^-4	8.201*10^-3	7.147*10^-3	CENPA/H2AX/NASP/NPM1/H2BC13/H3C12/H4C3/H4C5/ITGB3BP/MIS18A/HDAC8/CENPH/CENPX/CENPS/CENPW	9
BP	GO:0032204	regulation of telomere maintenance	9/562	81/18670	7.231*10^-4	8.563*10^-3	7.462*10^-3	DKC1/HNRNPC/NEK2/CCT3/AURKB/CCT7/CCT4/CCT8/HDAC8	10
BP	GO:0006626	protein targeting to mitochondrion	10/562	98/18670	7.347*10^-4	8.670*10^-3	7.555*10^-3	PDCD5/TIMM17B/TOMM40/HAX1/UBL5/TIMM50/DNAJC19/ROMO1/IMMP1L/TIMM23	11
BP	GO:0002220	innate immune response activating cell surface receptor signaling pathway	11/562	116/18670	7.561*10^-4	8.860*10^-3	7.721*10^-3	PSMA1/PSMA2/PSMA4/PSMA7/PSMB1/PSMB3/PSMB4/PSMB6/PSMD4/PSMD10/PSMD14	11
BP	GO:2000736	regulation of stem cell differentiation	11/562	116/18670	7.561*10^-4	8.860*10^-3	7.721*10^-3	PSMA1/PSMA2/PSMA4/PSMA7/PSMB1/PSMB3/PSMB4/PSMB6/PSMD4/PSMD10/PSMD14	17
BP	GO:0071453	cellular response to oxygen levels	17/562	234/18670	7.591*10^-4	8.864*10^-3	7.724*10^-3	CCNB1/PSMA1/PSMA2/PSMA4/PSMA7/PSMB1/PSMB3/PSMB4/PSMB6/PSMD4/PSMD10/RPS27A/ELOC/ELOB/RBX1/PSMD14/CHCHD2	9
BP	GO:0010833	telomere maintenance via telomere lengthening	9/562	82/18670	7.911*10^-4	9.150*10^-3	7.974*10^-3	DKC1/HNRNPC/NEK2/CCT3/AURKB/CCT7/CCT4/CCT8/GAR1	7
BP	GO:0000731	DNA synthesis involved in DNA repair	7/562	51/18670	7.918*10^-4	9.150*10^-3	7.974*10^-3	PCNA/RFC4/RPA3/RPS27A/PCLAF/MAD2L2/FAAP20	7
BP	GO:0032206	positive regulation of telomere maintenance	7/562	51/18670	7.918*10^-4	9.150*10^-3	7.974*10^-3	DKC1/NEK2/CCT3/AURKB/CCT7/CCT4/CCT8	11
BP	GO:0060147	regulation of posttranscriptional gene silencing	11/562	117/18670	8.124*10^-4	9.325*10^-3	8.126*10^-3	POLR2C/POLR2G/POLR2H/POLR2I/POLR2K/AAAS/H3C12/H4C3/H4C5/RAE1/NUP37	11
BP	GO:0060966	regulation of gene silencing by RNA	11/562	117/18670	8.124*10^-4	9.325*10^-3	8.126*10^-3	POLR2C/POLR2G/POLR2H/POLR2I/POLR2K/AAAS/H3C12/H4C3/H4C5/RAE1/NUP37	7
BP	GO:0051438	regulation of ubiquitin-protein transferase activity	7/562	52/18670	8.916*10^-4	1.020*10^-2	8.887*10^-3	CDC20/RPL5/RPS7/MAD2L2/UBE2C/PARK7/UBE2S	14
BP	GO:0071347	cellular response to interleukin-1	14/562	179/18670	1.070*10^-3	1.220*10^-2	1.063*10^-2	PSMA1/PSMA2/PSMA4/PSMA7/PSMB1/PSMB3/PSMB4/PSMB6/PSMD4/PSMD10/RPS27A/RBX1/PSMD14/RBMX	4
BP	GO:0051444	negative regulation of ubiquitin-protein transferase activity	4/562	16/18670	1.108*10^-3	1.259*10^-2	1.097*10^-2	RPL5/RPS7/MAD2L2/PARK7	8
BP	GO:0044786	cell cycle DNA replication	8/562	71/18670	1.289*10^-3	1.460*10^-2	1.272*10^-2	PCNA/RFC4/RPA3/SLBP/CHEK2/GMNN/POLE4/CDT1	11
BP	GO:0001736	establishment of planar polarity	11/562	124/18670	1.312*10^-3	1.471*10^-2	1.282*10^-2	PSMA1/PSMA2/PSMA4/PSMA7/PSMB1/PSMB3/PSMB4/PSMB6/PSMD4/PSMD10/PSMD14	11
BP	GO:0007164	establishment of tissue polarity	11/562	124/18670	1.312*10^-3	1.471*10^-2	1.282*10^-2	PSMA1/PSMA2/PSMA4/PSMA7/PSMB1/PSMB3/PSMB4/PSMB6/PSMD4/PSMD10/PSMD14	11
BP	GO:0051101	regulation of DNA binding	11/562	124/18670	1.312*10^-3	1.471*10^-2	1.282*10^-2	CSNK2B/HDAC2/JAK2/NEK2/NME1/TFAP4/SUMO1/MAD2L2/PARK7/HDAC8/CDT1	6
BP	GO:0044743	protein transmembrane import into intracellular organelle	6/562	41/18670	1.329*10^-3	1.482*10^-2	1.292*10^-2	TIMM17B/TOMM40/TIMM50/DNAJC19/ROMO1/TIMM23	13
BP	GO:0051170	import into nucleus	13/562	163/18670	1.335*10^-3	1.482*10^-2	1.292*10^-2	RAN/SMN1/SNRPD1/SNRPD2/SNRPD3/SNRPE/SNRPF/SNRPG/GEMIN2/NUTF2/TARDBP/HIKESHI/GEMIN6	13
BP	GO:1902600	proton transmembrane transport	13/562	163/18670	1.335*10^-3	1.482*10^-2	1.292*10^-2	ATP5F1E/ATP5MC2/ATP5ME/ATP5PF/COX5B/COX6A1/COX6C/COX7B/COX7A2L/ATP5MF/COX17/ATP5PD/PARK7	5
BP	GO:0070198	protein localization to chromosome, telomeric region	5/562	28/18670	1.344*10^-3	1.486*10^-2	1.295*10^-2	DKC1/CCT3/CCT7/CCT4/CCT8	15
BP	GO:0031396	regulation of protein ubiquitination	15/562	204/18670	1.347*10^-3	1.486*10^-2	1.295*10^-2	CDC20/PSMD10/RPL5/RPS7/MAD2L2/UBE2C/PARK7/UBE2S/TBC1D7/HDAC8/PRR7/COMMD1/CENPX/SVBP/CENPS	7
BP	GO:0090307	mitotic spindle assembly	7/562	56/18670	1.394*10^-3	1.532*10^-2	1.335*10^-2	BIRC5/CDC20/DRG1/NEK2/AAAS/AURKB/CHEK2	4
BP	GO:0070525	tRNA threonylcarbamoyladenosine metabolic process	4/562	17/18670	1.415*10^-3	1.544*10^-2	1.346*10^-2	HSD17B10/LAGE3/TPRKB/TRIT1	4
BP	GO:2001267	regulation of cysteine-type endopeptidase activity involved in apoptotic signaling pathway	4/562	17/18670	1.415*10^-3	1.544*10^-2	1.346*10^-2	JAK2/TFAP4/PARK7/PRR7	6
BP	GO:0090503	RNA phosphodiester bond hydrolysis, exonucleolytic	6/562	42/18670	1.512*10^-3	1.645*10^-2	1.434*10^-2	EXOSC3/EXOSC1/EXOSC4/EXOSC5/TRIR/ERI3	8
BP	GO:0044766	multi-organism transport	8/562	73/18670	1.546*10^-3	1.672*10^-2	1.457*10^-2	RAN/RPS27A/AAAS/RAE1/ALYREF/NUP37/THOC6/THOC7	8
BP	GO:1902579	multi-organism localization	8/562	73/18670	1.546*10^-3	1.672*10^-2	1.457*10^-2	RAN/RPS27A/AAAS/RAE1/ALYREF/NUP37/THOC6/THOC7	10
BP	GO:0051225	spindle assembly	10/562	108/18670	1.556*10^-3	1.677*10^-2	1.461*10^-2	BIRC5/CDC20/DRG1/NEK2/AAAS/AURKB/CHEK2/SAC3D1/HAUS1/CENPW	5
BP	GO:0006294	nucleotide-excision repair, preincision complex assembly	5/562	29/18670	1.584*10^-3	1.702*10^-2	1.483*10^-2	CETN2/RPA3/RPS27A/RBX1/GTF2H5	12
BP	GO:0090263	positive regulation of canonical Wnt signaling pathway	12/562	147/18670	1.657*10^-3	1.775*10^-2	1.546*10^-2	FGF10/PSMA1/PSMA2/PSMA4/PSMA7/PSMB1/PSMB3/PSMB4/PSMB6/PSMD4/PSMD10/PSMD14	13
BP	GO:0033209	tumor necrosis factor-mediated signaling pathway	13/562	167/18670	1.662*10^-3	1.775*10^-2	1.546*10^-2	JAK2/PSMA1/PSMA2/PSMA4/PSMA7/PSMB1/PSMB3/PSMB4/PSMB6/PSMD4/PSMD10/PSMD14/EDA2R	21
BP	GO:0033044	regulation of chromosome organization	21/562	342/18670	1.692*10^-3	1.801*10^-2	1.569*10^-2	CCNB1/CDC20/DKC1/HNRNPC/NEK2/CCT3/NELFE/NAA10/AURKB/PTTG1/TRIP13/MAD2L2/TACC3/CCT7/CCT4/CCT8/LCMT1/ANAPC11/HDAC8/CDT1/RMI2	22
BP	GO:0032259	methylation	22/562	366/18670	1.737*10^-3	1.843*10^-2	1.606*10^-2	FBL/GCSH/HSD17B10/MEN1/METTL1/SNRPD3/TYMS/NELFE/ECE2/SMYD5/EMG1/METTL5/MRM2/LCMT1/TRMT112/DPH5/MIS18A/NDUFAF7/KMT2C/THUMPD2/DPY30/METTL18	14
BP	GO:0048002	antigen processing and presentation of peptide antigen	14/562	189/18670	1.795*10^-3	1.899*10^-2	1.654*10^-2	KIF22/PSMA1/PSMA2/PSMA4/PSMA7/PSMB1/PSMB3/PSMB4/PSMB6/PSMD4/PSMD10/DYNLL1/BCAP31/PSMD14	15
BP	GO:2001020	regulation of response to DNA damage stimulus	15/562	214/18670	2.156*10^-3	2.260*10^-2	1.969*10^-2	FGF10/FUS/H2AX/PCNA/PSMD10/UBE2V2/EEF1E1/BABAM2/MAD2L2/RAD51AP1/CHEK2/TRIAP1/AUNIP/RMI2/NSMCE1	5
BP	GO:0002082	regulation of oxidative phosphorylation	5/562	31/18670	2.157*10^-3	2.260*10^-2	1.969*10^-2	CCNB1/CDK1/COX7A2L/PARK7/UQCC2	5
BP	GO:0045737	positive regulation of cyclin-dependent protein serine/threonine kinase activity	5/562	31/18670	2.157*10^-3	2.260*10^-2	1.969*10^-2	CCNB1/CKS1B/CKS2/PSMD10/PSRC1	8
BP	GO:0090502	RNA phosphodiester bond hydrolysis, endonucleolytic	8/562	77/18670	2.180*10^-3	2.277*10^-2	1.984*10^-2	RPS21/RIDA/RNASEH2A/ABT1/POP5/CPSF3/TSEN34/RPP21	4
BP	GO:0016075	rRNA catabolic process	4/562	19/18670	2.196*10^-3	2.280*10^-2	1.986*10^-2	EXOSC3/EXOSC4/EXOSC5/TRIR	4
BP	GO:0034471	ncRNA 5'-end processing	4/562	19/18670	2.196*10^-3	2.280*10^-2	1.986*10^-2	HSD17B10/ABT1/POP5/RPP21	13
BP	GO:0002478	antigen processing and presentation of exogenous peptide antigen	13/562	175/18670	2.515*10^-3	2.603*10^-2	2.268*10^-2	KIF22/PSMA1/PSMA2/PSMA4/PSMA7/PSMB1/PSMB3/PSMB4/PSMB6/PSMD4/PSMD10/DYNLL1/PSMD14	10
BP	GO:1900180	regulation of protein localization to nucleus	10/562	116/18670	2.649*10^-3	2.732*10^-2	2.380*10^-2	CDK1/DKC1/RAN/CCT3/NUTF2/CCT7/CCT4/CCT8/PARK7/TARDBP	4
BP	GO:0006271	DNA strand elongation involved in DNA replication	4/562	20/18670	2.681*10^-3	2.732*10^-2	2.380*10^-2	PCNA/RFC4/RNASEH2A/GINS2	4
BP	GO:0009219	pyrimidine deoxyribonucleotide metabolic process	4/562	20/18670	2.681*10^-3	2.732*10^-2	2.380*10^-2	NTHL1/TYMS/UNG/SMUG1	4
BP	GO:0009264	deoxyribonucleotide catabolic process	4/562	20/18670	2.681*10^-3	2.732*10^-2	2.380*10^-2	NUDT1/NTHL1/UNG/SMUG1	4
BP	GO:0070987	error-free translesion synthesis	4/562	20/18670	2.681*10^-3	2.732*10^-2	2.380*10^-2	PCNA/RFC4/RPA3/RPS27A	20
BP	GO:0090150	establishment of protein localization to membrane	20/562	332/18670	2.689*10^-3	2.732*10^-2	2.381*10^-2	RPL5/RPL6/RPL24/RPL30/RPL27A/RPL31/RPL35A/RPL37/RPL38/RPL39/RPL36A/RPS7/RPS20/RPS21/RPS24/RPS27A/SRP14/YWHAE/PDCD5/ROMO1	3
BP	GO:0006285	base-excision repair, AP site formation	3/562	10/18670	2.779*10^-3	2.786*10^-2	2.428*10^-2	NTHL1/UNG/SMUG1	3
BP	GO:0018065	protein-cofactor linkage	3/562	10/18670	2.779*10^-3	2.786*10^-2	2.428*10^-2	GCSH/NDUFAB1/GLRX5	3
BP	GO:0034427	nuclear-transcribed mRNA catabolic process, exonucleolytic, 3'-5'	3/562	10/18670	2.779*10^-3	2.786*10^-2	2.428*10^-2	EXOSC3/EXOSC4/EXOSC5	3
BP	GO:1903862	positive regulation of oxidative phosphorylation	3/562	10/18670	2.779*10^-3	2.786*10^-2	2.428*10^-2	CCNB1/CDK1/PARK7	9
BP	GO:0048024	regulation of mRNA splicing, via spliceosome	9/562	98/18670	2.784*10^-3	2.786*10^-2	2.428*10^-2	MAGOH/SRSF2/SRSF3/SRSF7/PRDX6/RBM8A/SF3B4/RNPS1/RBMX	11
BP	GO:0072655	establishment of protein localization to mitochondrion	11/562	137/18670	2.900*10^-3	2.894*10^-2	2.522*10^-2	YWHAE/PDCD5/TIMM17B/TOMM40/HAX1/UBL5/TIMM50/DNAJC19/ROMO1/IMMP1L/TIMM23	10
BP	GO:0032392	DNA geometric change	10/562	119/18670	3.191*10^-3	3.175*10^-2	2.767*10^-2	CETN2/HMGB3/RFC4/RPS27A/RBX1/SETX/RAD54B/GINS2/CHTF18/GTF2H5	13
BP	GO:1905330	regulation of morphogenesis of an epithelium	13/562	180/18670	3.210*10^-3	3.180*10^-2	2.771*10^-2	FGF10/PSMA1/PSMA2/PSMA4/PSMA7/PSMB1/PSMB3/PSMB4/PSMB6/PSMD4/PSMD10/PSMD14/FKBPL	4
BP	GO:0000966	RNA 5'-end processing	4/562	21/18670	3.233*10^-3	3.180*10^-2	2.771*10^-2	HSD17B10/ABT1/POP5/RPP21	4
BP	GO:0046386	deoxyribose phosphate catabolic process	4/562	21/18670	3.233*10^-3	3.180*10^-2	2.771*10^-2	NUDT1/NTHL1/UNG/SMUG1	4
BP	GO:0071459	protein localization to chromosome, centromeric region	4/562	21/18670	3.233*10^-3	3.180*10^-2	2.771*10^-2	CDK1/CENPA/AURKB/CDT1	7
BP	GO:0000381	regulation of alternative mRNA splicing, via spliceosome	7/562	65/18670	3.319*10^-3	3.254*10^-2	2.835*10^-2	MAGOH/SRSF2/SRSF3/SRSF7/RBM8A/RNPS1/RBMX	9
BP	GO:0016073	snRNA metabolic process	9/562	101/18670	3.414*10^-3	3.338*10^-2	2.908*10^-2	DKC1/POLR2C/POLR2G/POLR2H/POLR2I/POLR2K/EXOSC3/EXOSC4/EXOSC5	13
BP	GO:0019884	antigen processing and presentation of exogenous antigen	13/562	182/18670	3.529*10^-3	3.440*10^-2	2.998*10^-2	KIF22/PSMA1/PSMA2/PSMA4/PSMA7/PSMB1/PSMB3/PSMB4/PSMB6/PSMD4/PSMD10/DYNLL1/PSMD14	11
BP	GO:0001738	morphogenesis of a polarized epithelium	11/562	141/18670	3.619*10^-3	3.508*10^-2	3.057*10^-2	PSMA1/PSMA2/PSMA4/PSMA7/PSMB1/PSMB3/PSMB4/PSMB6/PSMD4/PSMD10/PSMD14	11
BP	GO:0070585	protein localization to mitochondrion	11/562	141/18670	3.619*10^-3	3.508*10^-2	3.057*10^-2	YWHAE/PDCD5/TIMM17B/TOMM40/HAX1/UBL5/TIMM50/DNAJC19/ROMO1/IMMP1L/TIMM23	9
BP	GO:0000079	regulation of cyclin-dependent protein serine/threonine kinase activity	9/562	102/18670	3.647*10^-3	3.514*10^-2	3.062*10^-2	CCNB1/CDKN3/CKS1B/CKS2/MEN1/PSMD10/TFAP4/CCNB2/PSRC1	9
BP	GO:0035335	peptidyl-tyrosine dephosphorylation	9/562	102/18670	3.647*10^-3	3.514*10^-2	3.062*10^-2	ACP1/CDKN3/DUSP11/PTPN21/DUSP12/DUSP23/TIMM50/PTPMT1/PGP	5
BP	GO:1904031	positive regulation of cyclin-dependent protein kinase activity	5/562	35/18670	3.734*10^-3	3.580*10^-2	3.120*10^-2	CCNB1/CKS1B/CKS2/PSMD10/PSRC1	3
BP	GO:2001269	positive regulation of cysteine-type endopeptidase activity involved in apoptotic signaling pathway	3/562	11/18670	3.737*10^-3	3.580*10^-2	3.120*10^-2	JAK2/TFAP4/PRR7	10
BP	GO:0006282	regulation of DNA repair	10/562	122/18670	3.817*10^-3	3.647*10^-2	3.178*10^-2	FGF10/FUS/H2AX/PCNA/UBE2V2/BABAM2/MAD2L2/RAD51AP1/AUNIP/RMI2	4
BP	GO:0000466	maturation of 5.8S rRNA from tricistronic rRNA transcript (SSU-rRNA, 5.8S rRNA, LSU-rRNA)	4/562	22/18670	3.859*10^-3	3.656*10^-2	3.186*10^-2	RPS21/ABT1/EXOSC3/ERI3	4
BP	GO:0000469	cleavage involved in rRNA processing	4/562	22/18670	3.859*10^-3	3.656*10^-2	3.186*10^-2	RPS21/ABT1/EXOSC3/ERI3	4
BP	GO:0000717	nucleotide-excision repair, DNA duplex unwinding	4/562	22/18670	3.859*10^-3	3.656*10^-2	3.186*10^-2	CETN2/RPS27A/RBX1/GTF2H5	12
BP	GO:0009451	RNA modification	12/562	163/18670	3.899*10^-3	3.683*10^-2	3.210*10^-2	DKC1/FBL/HSD17B10/METTL1/EMG1/ELP5/MRM2/TPRKB/TRMT112/GAR1/TRIT1/THUMPD2	14
BP	GO:0070555	response to interleukin-1	14/562	207/18670	4.112*10^-3	3.874*10^-2	3.376*10^-2	PSMA1/PSMA2/PSMA4/PSMA7/PSMB1/PSMB3/PSMB4/PSMB6/PSMD4/PSMD10/RPS27A/RBX1/PSMD14/RBMX	5
BP	GO:0045740	positive regulation of DNA replication	5/562	36/18670	4.231*10^-3	3.975*10^-2	3.464*10^-2	CDK1/FGF10/PCNA/CACYBP/CDT1	14
BP	GO:0009124	nucleoside monophosphate biosynthetic process	14/562	208/18670	4.291*10^-3	4.020*10^-2	3.503*10^-2	ATP5F1E/ATP5MC2/ATP5ME/ATP5PF/COX5B/DGUOK/HPRT1/TYMS/AAAS/RAE1/ATP5MF/ATP5PD/NUP37/UQCC3	6
BP	GO:0006998	nuclear envelope organization	6/562	52/18670	4.557*10^-3	4.238*10^-2	3.693*10^-2	CCNB1/CDK1/EMD/BANF1/CCNB2/TARDBP	4
BP	GO:0000715	nucleotide-excision repair, DNA damage recognition	4/562	23/18670	4.562*10^-3	4.238*10^-2	3.693*10^-2	CETN2/RPS27A/RBX1/COPS5	4
BP	GO:0006297	nucleotide-excision repair, DNA gap filling	4/562	23/18670	4.562*10^-3	4.238*10^-2	3.693*10^-2	PCNA/RFC4/RPA3/RPS27A	22
BP	GO:0018205	peptidyl-lysine modification	22/562	397/18670	4.635*10^-3	4.289*10^-2	3.737*10^-2	ACTL6A/BLOC1S1/GCSH/HDAC2/MEN1/NDUFAB1/SUMO2/UBE2I/SUMO1/NELFE/AAAS/RAE1/SUPT7L/PARK7/GLRX5/MRGBP/POLE4/KMT2C/MEAF6/NUP37/DPY30/SGF29	13
BP	GO:0009142	nucleoside triphosphate biosynthetic process	13/562	188/18670	4.642*10^-3	4.289*10^-2	3.737*10^-2	ATP5F1E/ATP5MC2/ATP5ME/ATP5PF/COX5B/NME1/TYMS/AAAS/RAE1/ATP5MF/ATP5PD/NUP37/UQCC3	9
BP	GO:1904029	regulation of cyclin-dependent protein kinase activity	9/562	106/18670	4.707*10^-3	4.337*10^-2	3.780*10^-2	CCNB1/CDKN3/CKS1B/CKS2/MEN1/PSMD10/TFAP4/CCNB2/PSRC1	3
BP	GO:0007077	mitotic nuclear envelope disassembly	3/562	12/18670	4.872*10^-3	4.452*10^-2	3.880*10^-2	CCNB1/CDK1/CCNB2	3
BP	GO:0051988	regulation of attachment of spindle microtubules to kinetochore	3/562	12/18670	4.872*10^-3	4.452*10^-2	3.880*10^-2	CCNB1/NEK2/KNSTRN	3
BP	GO:1904668	positive regulation of ubiquitin protein ligase activity	3/562	12/18670	4.872*10^-3	4.452*10^-2	3.880*10^-2	CDC20/UBE2C/UBE2S	8
BP	GO:1903321	negative regulation of protein modification by small protein conjugation or removal	8/562	88/18670	5.001*10^-3	4.558*10^-2	3.972*10^-2	RPL5/RPS7/MAD2L2/PARK7/HDAC8/PRR7/COPS9/SVBP	9
BP	GO:0006275	regulation of DNA replication	9/562	108/18670	5.320*10^-3	4.836*10^-2	4.214*10^-2	CDK1/FGF10/PCNA/RFC4/CHEK2/CACYBP/GMNN/CHTF18/CDT1	5
BP	GO:0097064	ncRNA export from nucleus	5/562	38/18670	5.363*10^-3	4.862*10^-2	4.236*10^-2	NPM1/RAN/AAAS/RAE1/NUP37	6
BP	GO:0043392	negative regulation of DNA binding	6/562	54/18670	5.497*10^-3	4.969*10^-2	4.330*10^-2	HDAC2/JAK2/NEK2/TFAP4/SUMO1/MAD2L2	12
BP	GO:0009206	purine ribonucleoside triphosphate biosynthetic process	12/562	171/18670	5.703*10^-3	5.142*10^-2	4.480*10^-2	ATP5F1E/ATP5MC2/ATP5ME/ATP5PF/COX5B/NME1/AAAS/RAE1/ATP5MF/ATP5PD/NUP37/UQCC3	11
BP	GO:0035567	non-canonical Wnt signaling pathway	11/562	150/18670	5.763*10^-3	5.182*10^-2	4.516*10^-2	PSMA1/PSMA2/PSMA4/PSMA7/PSMB1/PSMB3/PSMB4/PSMB6/PSMD4/PSMD10/PSMD14	7
BP	GO:0035019	somatic stem cell population maintenance	7/562	72/18670	5.868*10^-3	5.263*10^-2	4.586*10^-2	FGF10/POLR2C/POLR2G/POLR2H/POLR2I/POLR2K/VPS72	12
BP	GO:0009145	purine nucleoside triphosphate biosynthetic process	12/562	172/18670	5.968*10^-3	5.338*10^-2	4.652*10^-2	ATP5F1E/ATP5MC2/ATP5ME/ATP5PF/COX5B/NME1/AAAS/RAE1/ATP5MF/ATP5PD/NUP37/UQCC3	9
BP	GO:0032508	DNA duplex unwinding	9/562	110/18670	5.993*10^-3	5.346*10^-2	4.659*10^-2	CETN2/RFC4/RPS27A/RBX1/SETX/RAD54B/GINS2/CHTF18/GTF2H5	3
BP	GO:0009223	pyrimidine deoxyribonucleotide catabolic process	3/562	13/18670	6.193*10^-3	5.452*10^-2	4.751*10^-2	NTHL1/UNG/SMUG1	3
BP	GO:0010870	positive regulation of receptor biosynthetic process	3/562	13/18670	6.193*10^-3	5.452*10^-2	4.751*10^-2	HDAC2/JAK2/CNPY2	3
BP	GO:0045006	DNA deamination	3/562	13/18670	6.193*10^-3	5.452*10^-2	4.751*10^-2	EXOSC3/EXOSC4/EXOSC5	3
BP	GO:0071027	nuclear RNA surveillance	3/562	13/18670	6.193*10^-3	5.452*10^-2	4.751*10^-2	EXOSC3/EXOSC4/EXOSC5	3
BP	GO:0071028	nuclear mRNA surveillance	3/562	13/18670	6.193*10^-3	5.452*10^-2	4.751*10^-2	EXOSC3/EXOSC4/EXOSC5	18
BP	GO:0000209	protein polyubiquitination	18/562	310/18670	6.235*10^-3	5.474*10^-2	4.770*10^-2	PSMA1/PSMA2/PSMA4/PSMA7/PSMB1/PSMB3/PSMB4/PSMB6/PSMD4/PSMD10/RPS27A/UBE2V2/RBX1/PSMD14/UBE2C/UBE2S/UBE2T/ANAPC11	6
BP	GO:0065002	intracellular protein transmembrane transport	6/562	56/18670	6.572*10^-3	5.755*10^-2	5.015*10^-2	TIMM17B/TOMM40/TIMM50/DNAJC19/ROMO1/TIMM23	10
BP	GO:0042770	signal transduction in response to DNA damage	10/562	133/18670	6.986*10^-3	6.102*10^-2	5.317*10^-2	CCNB1/CDK1/PCNA/PSMD10/TFAP4/EEF1E1/BABAM2/MAD2L2/CHEK2/TRIAP1	4
BP	GO:0070911	global genome nucleotide-excision repair	4/562	26/18670	7.173*10^-3	6.250*10^-2	5.446*10^-2	CETN2/RPS27A/RBX1/GTF2H5	11
BP	GO:0060968	regulation of gene silencing	11/562	155/18670	7.327*10^-3	6.367*10^-2	5.548*10^-2	POLR2C/POLR2G/POLR2H/POLR2I/POLR2K/AAAS/H3C12/H4C3/H4C5/RAE1/NUP37	12
BP	GO:0009201	ribonucleoside triphosphate biosynthetic process	12/562	177/18670	7.447*10^-3	6.455*10^-2	5.625*10^-2	ATP5F1E/ATP5MC2/ATP5ME/ATP5PF/COX5B/NME1/AAAS/RAE1/ATP5MF/ATP5PD/NUP37/UQCC3	3
BP	GO:0006244	pyrimidine nucleotide catabolic process	3/562	14/18670	7.708*10^-3	6.613*10^-2	5.762*10^-2	NTHL1/UNG/SMUG1	3
BP	GO:0090231	regulation of spindle checkpoint	3/562	14/18670	7.708*10^-3	6.613*10^-2	5.762*10^-2	CCNB1/LCMT1/CDT1	3
BP	GO:0090266	regulation of mitotic cell cycle spindle assembly checkpoint	3/562	14/18670	7.708*10^-3	6.613*10^-2	5.762*10^-2	CCNB1/LCMT1/CDT1	3
BP	GO:1903504	regulation of mitotic spindle checkpoint	3/562	14/18670	7.708*10^-3	6.613*10^-2	5.762*10^-2	CCNB1/LCMT1/CDT1	11
BP	GO:0031570	DNA integrity checkpoint	11/562	157/18670	8.038*10^-3	6.878*10^-2	5.993*10^-2	CCNB1/CDK1/H2AX/MSH2/PCNA/NAE1/BABAM2/CHEK2/TRIAP1/CDT1/RHNO1	12
BP	GO:0030177	positive regulation of Wnt signaling pathway	12/562	179/18670	8.113*10^-3	6.925*10^-2	6.035*10^-2	FGF10/PSMA1/PSMA2/PSMA4/PSMA7/PSMB1/PSMB3/PSMB4/PSMB6/PSMD4/PSMD10/PSMD14	4
BP	GO:0022616	DNA strand elongation	4/562	27/18670	8.224*10^-3	6.963*10^-2	6.067*10^-2	PCNA/RFC4/RNASEH2A/GINS2	4
BP	GO:0031167	rRNA methylation	4/562	27/18670	8.224*10^-3	6.963*10^-2	6.067*10^-2	FBL/EMG1/MRM2/TRMT112	4
BP	GO:0032201	telomere maintenance via semi-conservative replication	4/562	27/18670	8.224*10^-3	6.963*10^-2	6.067*10^-2	PCNA/RFC4/RPA3/POLE4	5
BP	GO:0006284	base-excision repair	5/562	42/18670	8.240*10^-3	6.963*10^-2	6.067*10^-2	NTHL1/PCNA/RPA3/UNG/SMUG1	7
BP	GO:0031397	negative regulation of protein ubiquitination	7/562	77/18670	8.431*10^-3	7.106*10^-2	6.192*10^-2	RPL5/RPS7/MAD2L2/PARK7/HDAC8/PRR7/SVBP	15
BP	GO:0006352	DNA-templated transcription, initiation	15/562	249/18670	8.678*10^-3	7.296*10^-2	6.358*10^-2	CCNB1/CDK1/POLR2C/POLR2G/POLR2H/POLR2I/POLR2K/H4C3/H4C5/SUB1/SETX/MED30/SGF29/NR2C2AP/GTF2H5	14
BP	GO:0019882	antigen processing and presentation	14/562	226/18670	8.742*10^-3	7.331*10^-2	6.389*10^-2	KIF22/PSMA1/PSMA2/PSMA4/PSMA7/PSMB1/PSMB3/PSMB4/PSMB6/PSMD4/PSMD10/DYNLL1/BCAP31/PSMD14	12
BP	GO:0010565	regulation of cellular ketone metabolic process	12/562	181/18670	8.825*10^-3	7.383*10^-2	6.434*10^-2	PSMA1/PSMA2/PSMA4/PSMA7/PSMB1/PSMB3/PSMB4/PSMB6/PSMD4/PSMD10/PSMD14/PARK7	8
BP	GO:2001022	positive regulation of response to DNA damage stimulus	8/562	97/18670	8.905*10^-3	7.431*10^-2	6.476*10^-2	FGF10/FUS/H2AX/PCNA/EEF1E1/BABAM2/MAD2L2/NSMCE1	5
BP	GO:0000413	protein peptidyl-prolyl isomerization	5/562	43/18670	9.099*10^-3	7.555*10^-2	6.584*10^-2	FKBP2/PIN4/PPIA/PPIE/PPIH	5
BP	GO:0000959	mitochondrial RNA metabolic process	5/562	43/18670	9.099*10^-3	7.555*10^-2	6.584*10^-2	HSD17B10/MRPL12/MTERF3/TRIT1/SLIRP	11
BP	GO:0006754	ATP biosynthetic process	11/562	160/18670	9.203*10^-3	7.623*10^-2	6.643*10^-2	ATP5F1E/ATP5MC2/ATP5ME/ATP5PF/COX5B/AAAS/RAE1/ATP5MF/ATP5PD/NUP37/UQCC3	4
BP	GO:0050686	negative regulation of mRNA processing	4/562	28/18670	9.371*10^-3	7.743*10^-2	6.747*10^-2	SRSF7/NELFE/RNPS1/RBMX	3
BP	GO:0006388	tRNA splicing, via endonucleolytic cleavage and ligation	3/562	15/18670	9.422*10^-3	7.747*10^-2	6.751*10^-2	TSEN34/TRPT1/ZBTB8OS	3
BP	GO:0071025	RNA surveillance	3/562	15/18670	9.422*10^-3	7.747*10^-2	6.751*10^-2	EXOSC3/EXOSC4/EXOSC5	20
BP	GO:0051098	regulation of binding	20/562	373/18670	9.530*10^-3	7.817*10^-2	6.811*10^-2	CSNK2B/HDAC2/ITGA4/JAK2/STMN1/LRP1/MEN1/NEK2/NME1/RAN/TFAP4/SUMO1/AURKB/RAPGEF2/MAD2L2/PARK7/SNAPIN/GMNN/HDAC8/CDT1	12
BP	GO:0009127	purine nucleoside monophosphate biosynthetic process	12/562	183/18670	9.585*10^-3	7.824*10^-2	6.818*10^-2	ATP5F1E/ATP5MC2/ATP5ME/ATP5PF/COX5B/HPRT1/AAAS/RAE1/ATP5MF/ATP5PD/NUP37/UQCC3	12
BP	GO:0009168	purine ribonucleoside monophosphate biosynthetic process	12/562	183/18670	9.585*10^-3	7.824*10^-2	6.818*10^-2	ATP5F1E/ATP5MC2/ATP5ME/ATP5PF/COX5B/HPRT1/AAAS/RAE1/ATP5MF/ATP5PD/NUP37/UQCC3	18
BP	GO:1903829	positive regulation of cellular protein localization	18/562	324/18670	9.624*10^-3	7.837*10^-2	6.829*10^-2	CDK1/DKC1/EMD/LRP1/RAN/CCT3/YWHAE/PDCD5/BCAP31/NUTF2/CCT7/CCT4/CCT8/PARK7/TARDBP/RANGRF/UBL5/CDT1	7
BP	GO:1903312	negative regulation of mRNA metabolic process	7/562	79/18670	9.657*10^-3	7.844*10^-2	6.836*10^-2	HNRNPC/YBX1/SRSF7/NELFE/RNPS1/TARDBP/RBMX	22
BP	GO:0006417	regulation of translation	22/562	424/18670	9.719*10^-3	7.876*10^-2	6.863*10^-2	MAGOH/NPM1/PA2G4/POLR2G/RPL5/RPL38/TCOF1/TYMS/CNBP/EIF2B4/SECISBP2L/RBM8A/TSFM/RIDA/NGDN/EIF2AK1/MRPL13/DPH5/UQCC2/PYM1/SARNP/MALSU1	5
BP	GO:0007080	mitotic metaphase plate congression	5/562	44/18670	1.002*10^-2	8.098*10^-2	7.057*10^-2	CCNB1/KIF22/CDT1/NUF2/PSRC1	13
BP	GO:0050792	regulation of viral process	13/562	208/18670	1.052*10^-2	8.482*10^-2	7.391*10^-2	POLR2C/POLR2G/POLR2H/POLR2I/POLR2K/PPIA/SUPT4H1/TFAP4/NELFE/BANF1/PPIE/PPIH/TARDBP	6
BP	GO:0006220	pyrimidine nucleotide metabolic process	6/562	62/18670	1.070*10^-2	8.612*10^-2	7.505*10^-2	ERH/NME1/NTHL1/TYMS/UNG/SMUG1	7
BP	GO:0001510	RNA methylation	7/562	81/18670	1.101*10^-2	8.836*10^-2	7.699*10^-2	FBL/HSD17B10/METTL1/EMG1/MRM2/TRMT112/THUMPD2	3
BP	GO:0000394	RNA splicing, via endonucleolytic cleavage and ligation	3/562	16/18670	1.134*10^-2	9.016*10^-2	7.857*10^-2	TSEN34/TRPT1/ZBTB8OS	3
BP	GO:0030397	membrane disassembly	3/562	16/18670	1.134*10^-2	9.016*10^-2	7.857*10^-2	CCNB1/CDK1/CCNB2	3
BP	GO:0051081	nuclear envelope disassembly	3/562	16/18670	1.134*10^-2	9.016*10^-2	7.857*10^-2	CCNB1/CDK1/CCNB2	3
BP	GO:0099116	tRNA 5'-end processing	3/562	16/18670	1.134*10^-2	9.016*10^-2	7.857*10^-2	HSD17B10/POP5/RPP21	12
BP	GO:0006367	transcription initiation from RNA polymerase II promoter	12/562	188/18670	1.171*10^-2	9.263*10^-2	8.072*10^-2	CCNB1/CDK1/POLR2C/POLR2G/POLR2H/POLR2I/POLR2K/SUB1/MED30/SGF29/NR2C2AP/GTF2H5	12
BP	GO:0043902	positive regulation of multi-organism process	12/562	188/18670	1.171*10^-2	9.263*10^-2	8.072*10^-2	HDAC2/POLR2C/POLR2G/POLR2H/POLR2I/POLR2K/PPIA/SUPT4H1/TFAP4/NELFE/PPIE/PPIH	7
BP	GO:0016925	protein sumoylation	7/562	82/18670	1.173*10^-2	9.263*10^-2	8.072*10^-2	SUMO2/UBE2I/SUMO1/AAAS/RAE1/PARK7/NUP37	11
BP	GO:0002244	hematopoietic progenitor cell differentiation	11/562	166/18670	1.192*10^-2	9.379*10^-2	8.173*10^-2	PSMA1/PSMA2/PSMA4/PSMA7/PSMB1/PSMB3/PSMB4/PSMB6/PSMD4/PSMD10/PSMD14	4
BP	GO:0070979	protein K11-linked ubiquitination	4/562	30/18670	1.196*10^-2	9.379*10^-2	8.173*10^-2	UBE2C/UBE2S/UBE2T/ANAPC11	4
BP	GO:1902751	positive regulation of cell cycle G2/M phase transition	4/562	30/18670	1.196*10^-2	9.379*10^-2	8.173*10^-2	CCNB1/CDK1/NPM1/MTA3	5
BP	GO:0014075	response to amine	5/562	46/18670	1.204*10^-2	9.417*10^-2	8.206*10^-2	CDK1/HDAC2/HPRT1/NME1/SLC18A2	23
BP	GO:0062012	regulation of small molecule metabolic process	23/562	459/18670	1.226*10^-2	9.566*10^-2	8.336*10^-2	CCNB1/CDK1/PSMA1/PSMA2/PSMA4/PSMA7/PSMB1/PSMB3/PSMB4/PSMB6/PSMD4/PSMD10/RAN/AAAS/RAE1/COX7A2L/PSMD14/DUSP12/PARK7/LCMT1/NUP37/UQCC2/PGP	9
BP	GO:0007098	centrosome cycle	9/562	124/18670	1.270*10^-2	9.888*10^-2	8.616*10^-2	CDK1/CETN2/CETN3/NEK2/NPM1/RANBP1/PCLAF/SAC3D1/HAUS1	69
CC	GO:0098798	mitochondrial protein complex	69/578	262/19717	4.125*10^-46	2.025*10^-43	1.407*10^-43	ATP5F1E/ATP5MC2/ATP5ME/ATP5PF/COX6A1/HSD17B10/MRPL58/MTX1/NDUFA2/NDUFAB1/NDUFB3/NDUFB4/NDUFB8/NDUFB10/NDUFS5/NDUFS6/NDUFS8/MRPL12/SDHB/UQCRB/UQCRH/DAP3/ATP5MF/MRPL33/TIMM17B/TOMM40/ATP5PD/MRPL28/MTX2/MRPL3/MRPS28/MRPL13/MRPL18/MRPL15/MRPL22/UQCR10/MRPL51/MRPS17/MRPS21/NDUFB11/MRPL20/NDUFA12/MRPL47/MRPL17/MRPS26/MRPS15/MRPS9/MRPL40/MRPL36/MRPL11/MRPL9/MRPS34/MRPL57/APOO/MRPL24/MRPL43/ATP5MD/TIMM50…	79
CC	GO:0005743	mitochondrial inner membrane	79/578	473/19717	3.268*10^-37	8.024*10^-35	5.573*10^-35	ATP5F1E/ATP5MC2/ATP5ME/ATP5PF/COX5B/COX6A1/COX6C/COX7B/TIMM8A/MRPL58/MPV17/NDUFA2/NDUFAB1/NDUFB3/NDUFB4/NDUFB8/NDUFB10/NDUFS5/NDUFS6/NDUFS8/MRPL12/SDHB/TYMS/UQCRB/UQCRH/DAP3/COX7A2L/ATP5MF/MRPL33/TIMM17B/TOMM40/ATP5PD/MRPL28/MRPL3/MRPS28/MRPL13/MRPL18/MRPL15/MRPL22/UQCR10/MRPL51/MRPS17/TMEM14C/MRPS23/MRPS21/NDUFB11/AURKAIP1/MRPL20/NDUFA12/MRPL47/MRPL17/MRPS26/MRPS15/MRPS9/MRPL40/MRPL36/MRPL11/MRP…	50
CC	GO:0044391	ribosomal subunit	50/578	190/19717	1.517*10^-33	2.483*10^-31	1.724*10^-31	MRPL58/NDUFAB1/RPL5/RPL6/RPL24/RPL30/RPL27A/RPL31/RPL35A/RPL37/RPL38/RPL39/RPL36A/MRPL12/RPS7/RPS20/RPS21/RPS24/RPS27A/DAP3/MRPL33/MRPL28/MRPL3/MRPS28/MRPL13/MRPL18/MRPL15/MRPL22/RPL26L1/MRPL51/MRPS17/MRPS21/MRPL20/MRPL47/MRPL17/MRPS26/MRPS15/MRPS9/MRPL40/MRPL36/MRPL11/MRPL9/MRPS34/MRPL57/MRPL24/MRPL43/MALSU1/MRPL53/MRPL52/MRPL55	34
CC	GO:0000313	organellar ribosome	34/578	87/19717	1.146*10^-29	1.126*10^-27	7.819*10^-28	MRPL58/NDUFAB1/MRPL12/DAP3/MRPL33/MRPL28/MRPL3/MRPS28/MRPL13/MRPL18/MRPL15/MRPL22/MRPL51/MRPS17/MRPS21/MRPL20/MRPL47/MRPL17/MRPS26/MRPS15/MRPS9/MRPL40/MRPL36/MRPL11/MRPL9/MRPS34/MRPL57/MRPL24/MRPL43/MALSU1/MRPL53/CHCHD1/MRPL52/MRPL55	34
CC	GO:0005761	mitochondrial ribosome	34/578	87/19717	1.146*10^-29	1.126*10^-27	7.819*10^-28	MRPL58/NDUFAB1/MRPL12/DAP3/MRPL33/MRPL28/MRPL3/MRPS28/MRPL13/MRPL18/MRPL15/MRPL22/MRPL51/MRPS17/MRPS21/MRPL20/MRPL47/MRPL17/MRPS26/MRPS15/MRPS9/MRPL40/MRPL36/MRPL11/MRPL9/MRPS34/MRPL57/MRPL24/MRPL43/MALSU1/MRPL53/CHCHD1/MRPL52/MRPL55	54
CC	GO:0005840	ribosome	54/578	272/19717	1.883*10^-29	1.541*10^-27	1.071*10^-27	MRPL58/NDUFAB1/RPL5/RPL6/RPL24/RPL30/RPL27A/RPL31/RPL35A/RPL37/RPL38/RPL39/RPL36A/MRPL12/RPS7/RPS20/RPS21/RPS24/RPS27A/DAP3/MRPL33/MRPL28/MRPL3/MRPS28/MRPL13/MRPL18/MRPL15/MRPL22/RPL26L1/MRPL51/MRPS17/MRPS23/MRPS21/AURKAIP1/MRPL20/MRPL47/MRPL17/MRPS26/MRPS15/MRPS9/MRPL40/MRPL36/MRPL11/MRPL9/MRPS34/MRPL57/MRPL24/MRPL43/GADD45GIP1/MALSU1/MRPL53/CHCHD1/MRPL52/MRPL55	37
CC	GO:0015934	large ribosomal subunit	37/578	121/19717	1.106*10^-27	7.756*10^-26	5.387*10^-26	MRPL58/NDUFAB1/RPL5/RPL6/RPL24/RPL30/RPL27A/RPL31/RPL35A/RPL37/RPL38/RPL39/RPL36A/MRPL12/MRPL33/MRPL28/MRPL3/MRPL13/MRPL18/MRPL15/MRPL22/RPL26L1/MRPL51/MRPL20/MRPL47/MRPL17/MRPL40/MRPL36/MRPL11/MRPL9/MRPL57/MRPL24/MRPL43/MALSU1/MRPL53/MRPL52/MRPL55	25
CC	GO:0000315	organellar large ribosomal subunit	25/578	57/19717	1.179*10^-23	6.433*10^-22	4.468*10^-22	MRPL58/NDUFAB1/MRPL12/MRPL33/MRPL28/MRPL3/MRPL13/MRPL18/MRPL15/MRPL22/MRPL51/MRPL20/MRPL47/MRPL17/MRPL40/MRPL36/MRPL11/MRPL9/MRPL57/MRPL24/MRPL43/MALSU1/MRPL53/MRPL52/MRPL55	25
CC	GO:0005762	mitochondrial large ribosomal subunit	25/578	57/19717	1.179*10^-23	6.433*10^-22	4.468*10^-22	MRPL58/NDUFAB1/MRPL12/MRPL33/MRPL28/MRPL3/MRPL13/MRPL18/MRPL15/MRPL22/MRPL51/MRPL20/MRPL47/MRPL17/MRPL40/MRPL36/MRPL11/MRPL9/MRPL57/MRPL24/MRPL43/MALSU1/MRPL53/MRPL52/MRPL55	61
CC	GO:0005759	mitochondrial matrix	61/578	469/19717	7.654*10^-23	3.758*10^-21	2.610*10^-21	ATP5F1E/CCNB1/CDK1/DGUOK/BLOC1S1/GCSH/HSD17B10/HSPE1/MRPL58/NUDT1/NDUFAB1/NDUFB8/NDUFS8/PIN4/MRPL12/TYMS/DAP3/MRPL33/TSFM/RIDA/MRPL28/MRPL3/PARK7/MRPS28/MRPL13/MRPL18/MRPL15/MRPL22/MRM2/GLRX5/MRPL51/MRPS17/MRPS21/TRIT1/MRPL20/NDUFAF7/LYRM4/MRPL47/MRPL17/MRPS26/MRPS15/MRPS9/MRPL40/MRPL36/MRPL11/MRPL9/MRPS34/MRPL57/MRPL24/FLAD1/UQCC2/MRPL43/GADD45GIP1/FDX2/MALSU1/MRPL53/CHCHD1/MRPL52/NAXE/MRPL55/DN…	37
CC	GO:0005681	spliceosomal complex	37/578	185/19717	1.279*10^-20	5.708*10^-19	3.965*10^-19	HNRNPC/MAGOH/YBX1/SRSF2/SNRPA/SNRPA1/SNRPC/SNRPD1/SNRPD2/SNRPD3/SNRPE/SNRPF/SNRPG/GEMIN2/BUD31/RBM8A/ALYREF/SF3B4/BCAS2/PPIE/PPIH/USP39/SF3A3/LSM6/LSM5/LSM4/LSM3/RBMX/CWC15/RBMX2/SF3B6/MAGOHB/ISY1/LSM2/SNRNP25/SF3B5/ZCRB1	32
CC	GO:0098800	inner mitochondrial membrane protein complex	32/578	135/19717	2.349*10^-20	9.613*10^-19	6.677*10^-19	ATP5F1E/ATP5MC2/ATP5ME/ATP5PF/COX6A1/NDUFA2/NDUFAB1/NDUFB3/NDUFB4/NDUFB8/NDUFB10/NDUFS5/NDUFS6/NDUFS8/SDHB/UQCRB/UQCRH/ATP5MF/TIMM17B/ATP5PD/UQCR10/NDUFB11/NDUFA12/APOO/ATP5MD/TIMM50/DNAJC19/ROMO1/IMMP1L/UQCRHL/UQCC3/TIMM23	39
CC	GO:0044455	mitochondrial membrane part	39/578	229/19717	4.524*10^-19	1.709*10^-17	1.187*10^-17	ATP5F1E/ATP5MC2/ATP5ME/ATP5PF/COX6A1/COX7B/MTX1/NDUFA2/NDUFAB1/NDUFB3/NDUFB4/NDUFB8/NDUFB10/NDUFS5/NDUFS6/NDUFS8/SDHB/UQCRB/UQCRH/COX7A2L/ATP5MF/TIMM17B/TOMM40/ATP5PD/MTX2/UQCR10/NDUFB11/NDUFA12/APOO/ATP5MD/ATP23/TIMM50/DNAJC19/ROMO1/IMMP1L/UQCRHL/UQCC3/PET100/TIMM23	24
CC	GO:0005684	U2-type spliceosomal complex	24/578	90/19717	7.319*10^-17	2.567*10^-15	1.783*10^-15	SNRPA1/SNRPC/SNRPD1/SNRPD2/SNRPD3/SNRPE/SNRPF/SNRPG/BUD31/RBM8A/SF3B4/BCAS2/PPIE/SF3A3/LSM6/LSM5/LSM4/LSM3/CWC15/RBMX2/MAGOHB/ISY1/LSM2/SF3B5	22
CC	GO:0071013	catalytic step 2 spliceosome	22/578	87/19717	4.891*10^-15	1.601*10^-13	1.112*10^-13	HNRNPC/MAGOH/SNRPA1/SNRPD1/SNRPD2/SNRPD3/SNRPE/SNRPF/SNRPG/BUD31/RBM8A/ALYREF/BCAS2/PPIE/SF3A3/LSM3/RBMX/CWC15/SF3B6/MAGOHB/ISY1/LSM2	17
CC	GO:0071005	U2-type precatalytic spliceosome	17/578	50/19717	2.774*10^-14	8.513*10^-13	5.914*10^-13	SNRPA1/SNRPD1/SNRPD2/SNRPD3/SNRPE/SNRPF/SNRPG/SF3B4/SF3A3/LSM6/LSM5/LSM4/LSM3/RBMX2/MAGOHB/LSM2/SF3B5	17
CC	GO:0071011	precatalytic spliceosome	17/578	51/19717	4.050*10^-14	1.170*10^-12	8.124*10^-13	SNRPA1/SNRPD1/SNRPD2/SNRPD3/SNRPE/SNRPF/SNRPG/SF3B4/SF3A3/LSM6/LSM5/LSM4/LSM3/RBMX2/MAGOHB/LSM2/SF3B5	23
CC	GO:0120114	Sm-like protein family complex	23/578	116/19717	3.200*10^-13	8.730*10^-12	6.064*10^-12	SMN1/SNRPA/SNRPA1/SNRPC/SNRPD1/SNRPD2/SNRPD3/SNRPE/SNRPF/SNRPG/GEMIN2/PPIH/USP39/SF3A3/LSM6/LSM5/LSM4/LSM3/RBMX2/SF3B6/LSM2/GEMIN6/SF3B5	20
CC	GO:0005746	mitochondrial respiratory chain	20/578	88/19717	7.621*10^-13	1.970*10^-11	1.368*10^-11	COX6A1/COX7B/NDUFA2/NDUFAB1/NDUFB3/NDUFB4/NDUFB8/NDUFB10/NDUFS5/NDUFS6/NDUFS8/SDHB/UQCRB/UQCRH/COX7A2L/UQCR10/NDUFB11/NDUFA12/UQCRHL/UQCC3	38
CC	GO:0098687	chromosomal region	38/578	349/19717	3.540*10^-12	8.690*10^-11	6.036*10^-11	BIRC5/CCNB1/CDK1/CENPA/H2AX/KIF22/MEN1/MSH2/NEK2/PCNA/H4C3/H4C5/DYNLL1/AURKB/ALYREF/CHEK2/PMF1/CBX3/SETX/ITGB3BP/NGDN/MIS18A/GAR1/MEAF6/CENPH/NUP37/THOC6/THOC7/CDT1/NUF2/KNSTRN/ANAPC16/NUDCD2/SPC24/NSMCE1/CENPX/CENPS/CENPW	19
CC	GO:0098803	respiratory chain complex	19/578	85/19717	3.932*10^-12	9.194*10^-11	6.387*10^-11	COX6A1/COX7B/NDUFA2/NDUFAB1/NDUFB3/NDUFB4/NDUFB8/NDUFB10/NDUFS5/NDUFS6/NDUFS8/SDHB/UQCRB/UQCRH/UQCR10/NDUFB11/NDUFA12/UQCRHL/UQCC3	12
CC	GO:0005689	U12-type spliceosomal complex	12/578	27/19717	4.186*10^-12	9.343*10^-11	6.489*10^-11	YBX1/SNRPD1/SNRPD2/SNRPD3/SNRPE/SNRPF/SNRPG/SF3B4/SF3B6/SNRNP25/SF3B5/ZCRB1	20
CC	GO:0097525	spliceosomal snRNP complex	20/578	99/19717	7.872*10^-12	1.681*10^-10	1.167*10^-10	SNRPA/SNRPA1/SNRPC/SNRPD1/SNRPD2/SNRPD3/SNRPE/SNRPF/SNRPG/PPIH/USP39/SF3A3/LSM6/LSM5/LSM4/LSM3/RBMX2/SF3B6/LSM2/SF3B5	20
CC	GO:0070469	respiratory chain	20/578	100/19717	9.575*10^-12	1.959*10^-10	1.361*10^-10	COX6A1/COX7B/NDUFA2/NDUFAB1/NDUFB3/NDUFB4/NDUFB8/NDUFB10/NDUFS5/NDUFS6/NDUFS8/SDHB/UQCRB/UQCRH/COX7A2L/UQCR10/NDUFB11/NDUFA12/UQCRHL/UQCC3	20
CC	GO:0030532	small nuclear ribonucleoprotein complex	20/578	105/19717	2.459*10^-11	4.830*10^-10	3.355*10^-10	SNRPA/SNRPA1/SNRPC/SNRPD1/SNRPD2/SNRPD3/SNRPE/SNRPF/SNRPG/PPIH/USP39/SF3A3/LSM6/LSM5/LSM4/LSM3/RBMX2/SF3B6/LSM2/SF3B5	13
CC	GO:0046540	U4/U6 x U5 tri-snRNP complex	13/578	42/19717	1.209*10^-10	2.198*10^-9	1.527*10^-9	SNRPD1/SNRPD2/SNRPD3/SNRPE/SNRPF/SNRPG/PPIH/USP39/LSM6/LSM5/LSM4/LSM3/LSM2	13
CC	GO:0097526	spliceosomal tri-snRNP complex	13/578	42/19717	1.209*10^-10	2.198*10^-9	1.527*10^-9	SNRPD1/SNRPD2/SNRPD3/SNRPE/SNRPF/SNRPG/PPIH/USP39/LSM6/LSM5/LSM4/LSM3/LSM2	20
CC	GO:0000779	condensed chromosome, centromeric region	20/578	118/19717	2.232*10^-10	3.915*10^-9	2.719*10^-9	BIRC5/CCNB1/CENPA/NEK2/AURKB/PMF1/CBX3/ITGB3BP/MEAF6/CENPH/NUP37/CDT1/NUF2/KNSTRN/ANAPC16/NUDCD2/SPC24/CENPX/CENPS/CENPW	11
CC	GO:0071007	U2-type catalytic step 2 spliceosome	11/578	30/19717	4.118*10^-10	6.762*10^-9	4.697*10^-9	SNRPA1/SNRPD1/SNRPD2/SNRPD3/SNRPE/SNRPF/SNRPG/BUD31/BCAS2/PPIE/CWC15	21
CC	GO:0000776	kinetochore	21/578	135/19717	4.131*10^-10	6.762*10^-9	4.697*10^-9	BIRC5/CCNB1/CENPA/KIF22/NEK2/DYNLL1/AURKB/PMF1/ITGB3BP/MEAF6/CENPH/NUP37/CDT1/NUF2/KNSTRN/ANAPC16/NUDCD2/SPC24/CENPX/CENPS/CENPW	9
CC	GO:0034719	SMN-Sm protein complex	9/578	18/19717	5.773*10^-10	9.144*10^-9	6.351*10^-9	SMN1/SNRPD1/SNRPD2/SNRPD3/SNRPE/SNRPF/SNRPG/GEMIN2/GEMIN6	18
CC	GO:0000777	condensed chromosome kinetochore	18/578	105/19717	1.475*10^-9	2.263*10^-8	1.572*10^-8	BIRC5/CCNB1/CENPA/NEK2/PMF1/ITGB3BP/MEAF6/CENPH/NUP37/CDT1/NUF2/KNSTRN/ANAPC16/NUDCD2/SPC24/CENPX/CENPS/CENPW	10
CC	GO:0005686	U2 snRNP	10/578	27/19717	2.335*10^-9	3.474*10^-8	2.413*10^-8	SNRPA1/SNRPD1/SNRPD2/SNRPD3/SNRPE/SNRPG/SF3A3/RBMX2/SF3B6/SF3B5	24
CC	GO:0000775	chromosome, centromeric region	24/578	193/19717	2.568*10^-9	3.708*10^-8	2.576*10^-8	BIRC5/CCNB1/CENPA/KIF22/NEK2/DYNLL1/AURKB/PMF1/CBX3/ITGB3BP/NGDN/MIS18A/MEAF6/CENPH/NUP37/CDT1/NUF2/KNSTRN/ANAPC16/NUDCD2/SPC24/CENPX/CENPS/CENPW	18
CC	GO:1990204	oxidoreductase complex	18/578	112/19717	4.314*10^-9	6.052*10^-8	4.204*10^-8	GCSH/NDUFA2/NDUFAB1/NDUFB3/NDUFB4/NDUFB8/NDUFB10/NDUFS5/NDUFS6/NDUFS8/SDHB/UQCRB/UQCRH/UQCR10/NDUFB11/NDUFA12/UQCRHL/UQCC3	7
CC	GO:0034709	methylosome	7/578	12/19717	1.251*10^-8	1.706*10^-7	1.185*10^-7	ERH/SNRPD1/SNRPD2/SNRPD3/SNRPE/SNRPF/SNRPG	17
CC	GO:0022626	cytosolic ribosome	17/578	112/19717	2.807*10^-8	3.725*10^-7	2.587*10^-7	RPL5/RPL6/RPL24/RPL30/RPL27A/RPL31/RPL35A/RPL37/RPL38/RPL39/RPL36A/RPS7/RPS20/RPS21/RPS24/RPS27A/RPL26L1	11
CC	GO:0000152	nuclear ubiquitin ligase complex	11/578	43/19717	3.068*10^-8	3.964*10^-7	2.753*10^-7	CDC20/BABAM2/RNF7/RBX1/MAD2L2/UBE2C/UBE2S/ANAPC11/PCGF6/PCGF1/ANAPC16	24
CC	GO:0000793	condensed chromosome	24/578	223/19717	4.464*10^-8	5.619*10^-7	3.903*10^-7	BIRC5/CCNB1/CENPA/H2AX/NEK2/UBE2I/BANF1/AURKB/PMF1/CBX3/ITGB3BP/MEAF6/CENPH/NUP37/CDT1/NUF2/KNSTRN/ANAPC16/NUDCD2/SPC24/NSMCE1/CENPX/CENPS/CENPW	8
CC	GO:0005839	proteasome core complex	8/578	20/19717	4.797*10^-8	5.888*10^-7	4.090*10^-7	PSMA1/PSMA2/PSMA4/PSMA7/PSMB1/PSMB3/PSMB4/PSMB6	25
CC	GO:0044445	cytosolic part	25/578	247/19717	7.885*10^-8	9.442*10^-7	6.559*10^-7	BLOC1S1/RPL5/RPL6/RPL24/RPL30/RPL27A/RPL31/RPL35A/RPL37/RPL38/RPL39/RPL36A/RPS7/RPS20/RPS21/RPS24/RPS27A/CCT3/PSMD14/CCT7/CCT4/CCT8/SNAPIN/RPL26L1/LAS1L	13
CC	GO:0005844	polysome	13/578	72/19717	1.500*10^-7	1.713*10^-6	1.190*10^-6	FUS/DRG1/PSMA1/RPL6/RPL24/RPL30/RPL31/RPL38/RPL39/RPL36A/RPS21/VBP1/NAA38	13
CC	GO:0015935	small ribosomal subunit	13/578	72/19717	1.500*10^-7	1.713*10^-6	1.190*10^-6	RPS7/RPS20/RPS21/RPS24/RPS27A/DAP3/MRPS28/MRPS17/MRPS21/MRPS26/MRPS15/MRPS9/MRPS34	11
CC	GO:0005747	mitochondrial respiratory chain complex I	11/578	50/19717	1.654*10^-7	1.765*10^-6	1.226*10^-6	NDUFA2/NDUFAB1/NDUFB3/NDUFB4/NDUFB8/NDUFB10/NDUFS5/NDUFS6/NDUFS8/NDUFB11/NDUFA12	11
CC	GO:0030964	NADH dehydrogenase complex	11/578	50/19717	1.654*10^-7	1.765*10^-6	1.226*10^-6	NDUFA2/NDUFAB1/NDUFB3/NDUFB4/NDUFB8/NDUFB10/NDUFS5/NDUFS6/NDUFS8/NDUFB11/NDUFA12	11
CC	GO:0045271	respiratory chain complex I	11/578	50/19717	1.654*10^-7	1.765*10^-6	1.226*10^-6	NDUFA2/NDUFAB1/NDUFB3/NDUFB4/NDUFB8/NDUFB10/NDUFS5/NDUFS6/NDUFS8/NDUFB11/NDUFA12	12
CC	GO:0000502	proteasome complex	12/578	63/19717	2.452*10^-7	2.508*10^-6	1.742*10^-6	PSMA1/PSMA2/PSMA4/PSMA7/PSMB1/PSMB3/PSMB4/PSMB6/PSMD4/PSMD10/PSMD14/ADRM1	12
CC	GO:0022625	cytosolic large ribosomal subunit	12/578	63/19717	2.452*10^-7	2.508*10^-6	1.742*10^-6	RPL5/RPL6/RPL24/RPL30/RPL27A/RPL31/RPL35A/RPL37/RPL38/RPL39/RPL36A/RPL26L1	32
CC	GO:0016607	nuclear speck	32/578	397/19717	2.666*10^-7	2.672*10^-6	1.856*10^-6	H2AX/KIF22/MAGOH/SRSF2/SRSF3/SRSF7/SNRPA1/SURF2/VPS72/SUMO1/PABPN1/DUSP11/FIBP/RBM8A/PQBP1/ALYREF/BCAS2/PPIE/PPIH/RNPS1/SF3A3/TARDBP/CBY1/ARL6IP4/CWC15/BMP2K/SCNM1/THOC6/THOC7/SARNP/TIMM50/RMI2	13
CC	GO:0030684	preribosome	13/578	76/19717	2.902*10^-7	2.824*10^-6	1.961*10^-6	FBL/RPS7/MPHOSPH10/EMG1/EBNA1BP2/NGDN/UTP11/MRTO4/NOP58/WDR74/NOL10/RPF1/LAS1L	12
CC	GO:1905369	endopeptidase complex	12/578	64/19717	2.938*10^-7	2.824*10^-6	1.961*10^-6	PSMA1/PSMA2/PSMA4/PSMA7/PSMB1/PSMB3/PSMB4/PSMB6/PSMD4/PSMD10/PSMD14/ADRM1	14
CC	GO:1905368	peptidase complex	14/578	89/19717	2.991*10^-7	2.824*10^-6	1.961*10^-6	PSMA1/PSMA2/PSMA4/PSMA7/PSMB1/PSMB3/PSMB4/PSMB6/PSMD4/PSMD10/PSMD14/ADRM1/ENY2/SGF29	6
CC	GO:0005687	U4 snRNP	6/578	13/19717	8.904*10^-7	8.249*10^-6	5.730*10^-6	SNRPD1/SNRPD2/SNRPD3/SNRPE/SNRPF/SNRPG	8
CC	GO:0000314	organellar small ribosomal subunit	8/578	28/19717	9.618*10^-7	8.433*10^-6	5.858*10^-6	DAP3/MRPS28/MRPS17/MRPS21/MRPS26/MRPS15/MRPS9/MRPS34	8
CC	GO:0005732	small nucleolar ribonucleoprotein complex	8/578	28/19717	9.618*10^-7	8.433*10^-6	5.858*10^-6	DKC1/FBL/SNRPF/MPHOSPH10/LSM6/POP5/NOP58/GAR1	8
CC	GO:0005763	mitochondrial small ribosomal subunit	8/578	28/19717	9.618*10^-7	8.433*10^-6	5.858*10^-6	DAP3/MRPS28/MRPS17/MRPS21/MRPS26/MRPS15/MRPS9/MRPS34	7
CC	GO:0005753	mitochondrial proton-transporting ATP synthase complex	7/578	22/19717	2.086*10^-6	1.797*10^-5	1.248*10^-5	ATP5F1E/ATP5MC2/ATP5ME/ATP5PF/ATP5MF/ATP5PD/ATP5MD	7
CC	GO:0045259	proton-transporting ATP synthase complex	7/578	23/19717	2.923*10^-6	2.443*10^-5	1.697*10^-5	ATP5F1E/ATP5MC2/ATP5ME/ATP5PF/ATP5MF/ATP5PD/ATP5MD	8
CC	GO:0042788	polysomal ribosome	8/578	32/19717	2.935*10^-6	2.443*10^-5	1.697*10^-5	RPL6/RPL24/RPL30/RPL31/RPL38/RPL39/RPL36A/RPS21	7
CC	GO:1905354	exoribonuclease complex	7/578	25/19717	5.446*10^-6	4.456*10^-5	3.095*10^-5	C1D/EXOSC3/EXOSC1/EXOSC4/WDR74/EXOSC5/LAS1L	6
CC	GO:0000176	nuclear exosome (RNase complex)	6/578	17/19717	5.809*10^-6	4.676*10^-5	3.248*10^-5	C1D/EXOSC3/EXOSC1/EXOSC4/WDR74/EXOSC5	5
CC	GO:0000276	mitochondrial proton-transporting ATP synthase complex, coupling factor F(o)	5/578	11/19717	8.491*10^-6	6.725*10^-5	4.671*10^-5	ATP5MC2/ATP5ME/ATP5PF/ATP5MF/ATP5PD	8
CC	GO:0005685	U1 snRNP	8/578	37/19717	9.468*10^-6	7.379*10^-5	5.125*10^-5	SNRPA/SNRPC/SNRPD1/SNRPD2/SNRPD3/SNRPE/SNRPF/SNRPG	12
CC	GO:0031970	organelle envelope lumen	12/578	88/19717	9.695*10^-6	7.438*10^-5	5.167*10^-5	TIMM8A/BLOC1S1/NDUFS5/COX17/HAX1/PARK7/CACYBP/CHCHD2/TRIAP1/UQCC2/COA6/TIMM23	8
CC	GO:0032040	small-subunit processome	8/578	38/19717	1.169*10^-5	8.828*10^-5	6.132*10^-5	FBL/RPS7/MPHOSPH10/EMG1/NGDN/UTP11/NOP58/NOL10	26
CC	GO:0005819	spindle	26/578	347/19717	1.301*10^-5	9.675*10^-5	6.721*10^-5	BIRC5/CCNB1/CDK1/CDC20/EMD/KIF22/NEK2/NPM1/PIN4/AAAS/RAE1/DYNLL1/AURKB/NUBP2/MAD2L2/TACC3/KATNA1/CBX3/SAC3D1/MTUS1/AUNIP/MZT2B/PSRC1/KNSTRN/HAUS1/NUDCD2	6
CC	GO:0035145	exon-exon junction complex	6/578	20/19717	1.688*10^-5	1.237*10^-4	8.591*10^-5	MAGOH/RBM8A/ALYREF/RNPS1/MAGOHB/PYM1	11
CC	GO:0005758	mitochondrial intermembrane space	11/578	79/19717	1.856*10^-5	1.340*10^-4	9.307*10^-5	TIMM8A/BLOC1S1/NDUFS5/COX17/HAX1/PARK7/CHCHD2/TRIAP1/UQCC2/COA6/TIMM23	5
CC	GO:0005688	U6 snRNP	5/578	13/19717	2.253*10^-5	1.580*10^-4	1.098*10^-4	LSM6/LSM5/LSM4/LSM3/LSM2	5
CC	GO:0045263	proton-transporting ATP synthase complex, coupling factor F(o)	5/578	13/19717	2.253*10^-5	1.580*10^-4	1.098*10^-4	ATP5MC2/ATP5ME/ATP5PF/ATP5MF/ATP5PD	6
CC	GO:0005680	anaphase-promoting complex	6/578	21/19717	2.304*10^-5	1.594*10^-4	1.107*10^-4	CDC20/MAD2L2/UBE2C/UBE2S/ANAPC11/ANAPC16	16
CC	GO:0000922	spindle pole	16/578	164/19717	2.708*10^-5	1.847*10^-4	1.283*10^-4	CCNB1/CDC20/EMD/NEK2/NPM1/AAAS/RAE1/AURKB/NUBP2/TACC3/KATNA1/AUNIP/PSRC1/KNSTRN/HAUS1/NUDCD2	5
CC	GO:0005744	TIM23 mitochondrial import inner membrane translocase complex	5/578	14/19717	3.420*10^-5	2.239*10^-4	1.555*10^-4	TIMM17B/TIMM50/DNAJC19/ROMO1/TIMM23	5
CC	GO:0005750	mitochondrial respiratory chain complex III	5/578	14/19717	3.420*10^-5	2.239*10^-4	1.555*10^-4	UQCRB/UQCRH/UQCR10/UQCRHL/UQCC3	5
CC	GO:0045275	respiratory chain complex III	5/578	14/19717	3.420*10^-5	2.239*10^-4	1.555*10^-4	UQCRB/UQCRH/UQCR10/UQCRHL/UQCC3	7
CC	GO:0070069	cytochrome complex	7/578	34/19717	4.847*10^-5	3.131*10^-4	2.175*10^-4	COX6A1/COX7B/UQCRB/UQCRH/UQCR10/UQCRHL/UQCC3	5
CC	GO:0005665	RNA polymerase II, core complex	5/578	15/19717	5.006*10^-5	3.192*10^-4	2.217*10^-4	POLR2C/POLR2G/POLR2H/POLR2I/POLR2K	6
CC	GO:0000178	exosome (RNase complex)	6/578	24/19717	5.303*10^-5	3.338*10^-4	2.319*10^-4	C1D/EXOSC3/EXOSC1/EXOSC4/WDR74/EXOSC5	16
CC	GO:0044452	nucleolar part	16/578	178/19717	7.328*10^-5	4.554*10^-4	3.163*10^-4	DKC1/FBL/POLR2H/POLR2K/TCOF1/SUMO1/DUSP11/RAE1/CRIPT/MPHOSPH10/AFF4/POP5/NOP58/GAR1/RPP21/CHCHD1	15
CC	GO:0000781	chromosome, telomeric region	15/578	161/19717	8.146*10^-5	5.000*10^-4	3.473*10^-4	CDK1/H2AX/MEN1/MSH2/PCNA/H4C3/H4C5/ALYREF/CHEK2/CBX3/SETX/GAR1/THOC6/THOC7/NSMCE1	12
CC	GO:0034708	methyltransferase complex	12/578	113/19717	1.202*10^-4	7.286*10^-4	5.061*10^-4	ERH/HDAC2/MEN1/SNRPD1/SNRPD2/SNRPD3/SNRPE/SNRPF/SNRPG/KMT2C/LAS1L/DPY30	25
CC	GO:0000790	nuclear chromatin	25/578	377/19717	1.378*10^-4	8.249*10^-4	5.730*10^-4	ACTL6A/CENPA/H2AX/H2AZ1/HDAC2/HMGB3/HNRNPC/MEN1/NASP/H2AC16/H2AC17/H2AC20/H3C12/H4C3/H4C5/BUD31/RAD51AP1/CBX3/TARDBP/RBMX/MTA3/ANP32E/INO80B/COPS9/SWI5	4
CC	GO:0005832	chaperonin-containing T-complex	4/578	11/19717	2.047*10^-4	1.196*10^-3	8.309*10^-4	CCT3/CCT7/CCT4/CCT8	4
CC	GO:0019774	proteasome core complex, beta-subunit complex	4/578	11/19717	2.047*10^-4	1.196*10^-3	8.309*10^-4	PSMB1/PSMB3/PSMB4/PSMB6	10
CC	GO:0005643	nuclear pore	10/578	89/19717	2.757*10^-4	1.593*10^-3	1.106*10^-3	CETN2/CETN3/RAN/RANBP1/SUMO1/AAAS/RAE1/NUTF2/ENY2/NUP37	5
CC	GO:0005697	telomerase holoenzyme complex	5/578	21/19717	2.932*10^-4	1.674*10^-3	1.163*10^-3	DKC1/HNRNPC/SNRPD3/SNRPE/GAR1	16
CC	GO:0032993	protein-DNA complex	16/578	202/19717	3.169*10^-4	1.789*10^-3	1.242*10^-3	CENPA/H2AX/H2AZ1/NPM1/PCNA/POLR2H/RPA3/H2AC16/H2AC17/H2AC20/H2BC13/H3C12/H4C3/H4C5/BCAS2/GINS2	5
CC	GO:0005682	U5 snRNP	5/578	22/19717	3.703*10^-4	2.066*10^-3	1.435*10^-3	SNRPD1/SNRPD2/SNRPD3/SNRPE/SNRPG	4
CC	GO:0043240	Fanconi anaemia nuclear complex	4/578	13/19717	4.232*10^-4	2.334*10^-3	1.622*10^-3	FAAP24/FAAP20/CENPX/CENPS	5
CC	GO:0030687	preribosome, large subunit precursor	5/578	23/19717	4.619*10^-4	2.492*10^-3	1.731*10^-3	EBNA1BP2/MRTO4/WDR74/RPF1/LAS1L	5
CC	GO:0033177	proton-transporting two-sector ATPase complex, proton-transporting domain	5/578	23/19717	4.619*10^-4	2.492*10^-3	1.731*10^-3	ATP5MC2/ATP5ME/ATP5PF/ATP5MF/ATP5PD	4
CC	GO:0000346	transcription export complex	4/578	14/19717	5.787*10^-4	3.089*10^-3	2.145*10^-3	ALYREF/THOC6/THOC7/SARNP	7
CC	GO:0016469	proton-transporting two-sector ATPase complex	7/578	51/19717	6.783*10^-4	3.581*10^-3	2.488*10^-3	ATP5F1E/ATP5MC2/ATP5ME/ATP5PF/ATP5MF/ATP5PD/ATP5MD	19
CC	GO:0000151	ubiquitin ligase complex	19/578	282/19717	6.989*10^-4	3.650*10^-3	2.536*10^-3	AUP1/CDC20/CKS1B/CKS2/SEL1L/ELOB/BABAM2/RNF7/RBX1/MAD2L2/UBE2C/CACYBP/UBE2S/ANAPC11/PCGF6/PCGF1/MED30/ANAPC16/COMMD1	4
CC	GO:0000778	condensed nuclear chromosome kinetochore	4/578	15/19717	7.710*10^-4	3.903*10^-3	2.711*10^-3	CCNB1/CENPA/PMF1/NUF2	4
CC	GO:0031462	Cul2-RING ubiquitin ligase complex	4/578	15/19717	7.710*10^-4	3.903*10^-3	2.711*10^-3	ELOB/RNF7/RBX1/COMMD1	4
CC	GO:0031616	spindle pole centrosome	4/578	15/19717	7.710*10^-4	3.903*10^-3	2.711*10^-3	EMD/NPM1/AURKB/NUBP2	13
CC	GO:0031461	cullin-RING ubiquitin ligase complex	13/578	158/19717	7.910*10^-4	3.963*10^-3	2.753*10^-3	CDC20/CKS1B/CKS2/ELOB/RNF7/RBX1/MAD2L2/UBE2C/CACYBP/UBE2S/ANAPC11/ANAPC16/COMMD1	5
CC	GO:0000780	condensed nuclear chromosome, centromeric region	5/578	26/19717	8.397*10^-4	4.165*10^-3	2.893*10^-3	CCNB1/CENPA/AURKB/PMF1/NUF2	16
CC	GO:0035770	ribonucleoprotein granule	16/578	223/19717	9.326*10^-4	4.579*10^-3	3.181*10^-3	YBX1/POLR2G/PSMA2/PSMA4/RPL6/SMN1/SNRPG/SUMO1/HAX1/LSM6/TARDBP/LSM4/LSM3/LSM2/SARNP/TSTD1	4
CC	GO:0000153	cytoplasmic ubiquitin ligase complex	4/578	16/19717	1.004*10^-3	4.882*10^-3	3.391*10^-3	AUP1/SEL1L/ELOB/RBX1	11
CC	GO:0000784	nuclear chromosome, telomeric region	11/578	125/19717	1.136*10^-3	5.470*10^-3	3.800*10^-3	CDK1/MEN1/MSH2/PCNA/H4C3/H4C5/ALYREF/CBX3/GAR1/THOC6/THOC7	10
CC	GO:0000786	nucleosome	10/578	107/19717	1.193*10^-3	5.685*10^-3	3.949*10^-3	CENPA/H2AX/H2AZ1/H2AC16/H2AC17/H2AC20/H2BC13/H3C12/H4C3/H4C5	6
CC	GO:0000307	cyclin-dependent protein kinase holoenzyme complex	6/578	42/19717	1.322*10^-3	6.240*10^-3	4.335*10^-3	CCNB1/CDK1/CKS1B/CKS2/PCNA/CCNB2	15
CC	GO:0036464	cytoplasmic ribonucleoprotein granule	15/578	212/19717	1.528*10^-3	7.146*10^-3	4.964*10^-3	YBX1/POLR2G/PSMA2/PSMA4/RPL6/SMN1/SNRPG/HAX1/LSM6/TARDBP/LSM4/LSM3/LSM2/SARNP/TSTD1	17
CC	GO:0061695	transferase complex, transferring phosphorus-containing groups	17/578	259/19717	1.732*10^-3	8.025*10^-3	5.574*10^-3	CCNB1/CDK1/CKS1B/CKS2/PCNA/PIK3CG/POLR2C/POLR2G/POLR2H/POLR2I/POLR2K/CCNB2/MAD2L2/POLR3K/POLE4/LAS1L/GTF2H5	11
CC	GO:0001650	fibrillar center	11/578	132/19717	1.767*10^-3	8.106*10^-3	5.631*10^-3	DKC1/FBL/TCOF1/SUMO1/DUSP11/RAE1/CRIPT/AFF4/NOP58/GAR1/CHCHD1	9
CC	GO:0031248	protein acetyltransferase complex	9/578	95/19717	1.884*10^-3	8.486*10^-3	5.894*10^-3	ACTL6A/NAA10/SUPT7L/MRGBP/POLE4/ENY2/MEAF6/NAA38/SGF29	9
CC	GO:1902493	acetyltransferase complex	9/578	95/19717	1.884*10^-3	8.486*10^-3	5.894*10^-3	ACTL6A/NAA10/SUPT7L/MRGBP/POLE4/ENY2/MEAF6/NAA38/SGF29	5
CC	GO:1902555	endoribonuclease complex	5/578	31/19717	1.923*10^-3	8.582*10^-3	5.961*10^-3	HSD17B10/POP5/TSEN34/RPP21/LAS1L	10
CC	GO:0044815	DNA packaging complex	10/578	115/19717	2.056*10^-3	9.095*10^-3	6.317*10^-3	CENPA/H2AX/H2AZ1/H2AC16/H2AC17/H2AC20/H2BC13/H3C12/H4C3/H4C5	5
CC	GO:1905348	endonuclease complex	5/578	32/19717	2.224*10^-3	9.752*10^-3	6.774*10^-3	HSD17B10/POP5/TSEN34/RPP21/LAS1L	4
CC	GO:0005838	proteasome regulatory particle	4/578	21/19717	2.940*10^-3	1.278*10^-2	8.874*10^-3	PSMD4/PSMD10/PSMD14/ADRM1	8
CC	GO:0000932	P-body	8/578	84/19717	3.211*10^-3	1.383*10^-2	9.605*10^-3	POLR2G/PSMA2/PSMA4/HAX1/LSM6/LSM4/LSM3/LSM2	3
CC	GO:0032797	SMN complex	3/578	11/19717	3.468*10^-3	1.481*10^-2	1.029*10^-2	SMN1/GEMIN2/GEMIN6	4
CC	GO:0101031	chaperone complex	4/578	22/19717	3.511*10^-3	1.486*10^-2	1.032*10^-2	CCT3/CCT7/CCT4/CCT8	10
CC	GO:1904813	ficolin-1-rich granule lumen	10/578	124/19717	3.566*10^-3	1.497*10^-2	1.040*10^-2	CSNK2B/ILF2/PPIA/PSMA2/PSMB1/SRP14/PSMD14/PPIE/CCT8/C1orf35	3
CC	GO:0044615	nuclear pore nuclear basket	3/578	12/19717	4.524*10^-3	1.836*10^-2	1.275*10^-2	CETN2/CETN3/ENY2	3
CC	GO:0071006	U2-type catalytic step 1 spliceosome	3/578	12/19717	4.524*10^-3	1.836*10^-2	1.275*10^-2	RBM8A/MAGOHB/ISY1	3
CC	GO:0071012	catalytic step 1 spliceosome	3/578	12/19717	4.524*10^-3	1.836*10^-2	1.275*10^-2	RBM8A/MAGOHB/ISY1	3
CC	GO:0097504	Gemini of coiled bodies	3/578	12/19717	4.524*10^-3	1.836*10^-2	1.275*10^-2	SMN1/GEMIN2/GEMIN6	9
CC	GO:0072686	mitotic spindle	9/578	109/19717	4.775*10^-3	1.922*10^-2	1.335*10^-2	CDK1/KIF22/AAAS/RAE1/DYNLL1/AURKB/TACC3/KATNA1/KNSTRN	4
CC	GO:0022624	proteasome accessory complex	4/578	24/19717	4.870*10^-3	1.944*10^-2	1.350*10^-2	PSMD4/PSMD10/PSMD14/ADRM1	24
CC	GO:0005635	nuclear envelope	24/578	464/19717	5.421*10^-3	2.146*10^-2	1.491*10^-2	BNIP1/CETN2/CETN3/EMD/NUDT1/NDUFB4/YBX1/RAN/RANBP1/UBE2I/SUMO1/AAAS/RAE1/BANF1/NUTF2/HAX1/CBX3/UNC50/CACYBP/ATRAID/MRPS23/ENY2/NUP37/TMEM18	4
CC	GO:0035327	transcriptionally active chromatin	4/578	25/19717	5.665*10^-3	2.225*10^-2	1.546*10^-2	AFF4/EXOSC3/EXOSC4/EXOSC5	3
CC	GO:0008250	oligosaccharyltransferase complex	3/578	13/19717	5.755*10^-3	2.242*10^-2	1.558*10^-2	TMEM258/KRTCAP2/OST4	22
CC	GO:0005874	microtubule	22/578	416/19717	5.887*10^-3	2.276*10^-2	1.581*10^-2	BIRC5/CDK1/TBCB/EMD/KIF22/STMN1/NEK2/TBCA/CCT3/DYNLL1/AURKB/CCT7/CCT4/CCT8/KATNA1/CFAP20/DCXR/MTUS1/DYNLRB1/PSRC1/KNSTRN/HAUS1	6
CC	GO:0008023	transcription elongation factor complex	6/578	58/19717	6.882*10^-3	2.640*10^-2	1.834*10^-2	AFF1/SUPT4H1/ELOC/ELOB/NELFE/AFF4	3
CC	GO:0000177	cytoplasmic exosome (RNase complex)	3/578	14/19717	7.166*10^-3	2.707*10^-2	1.880*10^-2	EXOSC3/EXOSC4/EXOSC5	3
CC	GO:0030677	ribonuclease P complex	3/578	14/19717	7.166*10^-3	2.707*10^-2	1.880*10^-2	HSD17B10/POP5/RPP21	5
CC	GO:1902562	H4 histone acetyltransferase complex	5/578	43/19717	8.171*10^-3	3.063*10^-2	2.127*10^-2	ACTL6A/MRGBP/POLE4/MEAF6/SGF29	8
CC	GO:0000794	condensed nuclear chromosome	8/578	99/19717	8.630*10^-3	3.210*10^-2	2.230*10^-2	CCNB1/CENPA/H2AX/NEK2/UBE2I/AURKB/PMF1/NUF2	5
CC	GO:0022627	cytosolic small ribosomal subunit	5/578	44/19717	9.001*10^-3	3.323*10^-2	2.308*10^-2	RPS7/RPS20/RPS21/RPS24/RPS27A	5
CC	GO:0031304	intrinsic component of mitochondrial inner membrane	5/578	45/19717	9.888*10^-3	3.596*10^-2	2.498*10^-2	TIMM17B/APOO/UQCC3/PET100/TIMM23	5
CC	GO:0031305	integral component of mitochondrial inner membrane	5/578	45/19717	9.888*10^-3	3.596*10^-2	2.498*10^-2	TIMM17B/APOO/UQCC3/PET100/TIMM23	3
CC	GO:0098799	outer mitochondrial membrane protein complex	3/578	16/19717	1.056*10^-2	3.811*10^-2	2.647*10^-2	MTX1/TOMM40/MTX2	7
CC	GO:0000123	histone acetyltransferase complex	7/578	85/19717	1.236*10^-2	4.431*10^-2	3.078*10^-2	ACTL6A/SUPT7L/MRGBP/POLE4/ENY2/MEAF6/SGF29	3
CC	GO:0005666	RNA polymerase III complex	3/578	17/19717	1.254*10^-2	4.463*10^-2	3.100*10^-2	POLR2H/POLR2K/POLR3K	7
CC	GO:1902554	serine/threonine protein kinase complex	7/578	88/19717	1.476*10^-2	5.215*10^-2	3.622*10^-2	CCNB1/CDK1/CKS1B/CKS2/PCNA/CCNB2/GTF2H5	8
CC	GO:1902911	protein kinase complex	8/578	109/19717	1.490*10^-2	5.224*10^-2	3.629*10^-2	CCNB1/CDK1/CKS1B/CKS2/PCNA/CCNB2/LAS1L/GTF2H5	12
CC	GO:0031968	organelle outer membrane	12/578	201/19717	1.574*10^-2	5.482*10^-2	3.808*10^-2	ATP5MC2/EMD/MTX1/NME1/RPS27A/NUTF2/TOMM40/HAX1/MTX2/MTERF3/VPS13C/CISD2	6
CC	GO:0005657	replication fork	6/578	70/19717	1.664*10^-2	5.755*10^-2	3.998*10^-2	H2AX/PCNA/RFC4/RPA3/BCAS2/GINS2	12
CC	GO:0019867	outer membrane	12/578	203/19717	1.689*10^-2	5.799*10^-2	4.028*10^-2	ATP5MC2/EMD/MTX1/NME1/RPS27A/NUTF2/TOMM40/HAX1/MTX2/MTERF3/VPS13C/CISD2	3
CC	GO:0035267	NuA4 histone acetyltransferase complex	3/578	20/19717	1.971*10^-2	6.674*10^-2	4.635*10^-2	ACTL6A/MRGBP/MEAF6	3
CC	GO:0043189	H4/H2A histone acetyltransferase complex	3/578	20/19717	1.971*10^-2	6.674*10^-2	4.635*10^-2	ACTL6A/MRGBP/MEAF6	6
CC	GO:0032592	integral component of mitochondrial membrane	6/578	73/19717	2.009*10^-2	6.758*10^-2	4.694*10^-2	TIMM17B/TOMM40/APOO/UQCC3/PET100/TIMM23	11
CC	GO:0101002	ficolin-1-rich granule	11/578	185/19717	2.079*10^-2	6.945*10^-2	4.824*10^-2	CSNK2B/ILF2/PPIA/PSMA2/PSMB1/SRP14/DYNLL1/PSMD14/PPIE/CCT8/C1orf35	6
CC	GO:0098573	intrinsic component of mitochondrial membrane	6/578	74/19717	2.135*10^-2	7.081*10^-2	4.919*10^-2	TIMM17B/TOMM40/APOO/UQCC3/PET100/TIMM23	4
CC	GO:0000788	nuclear nucleosome	4/578	38/19717	2.454*10^-2	8.088*10^-2	5.618*10^-2	CENPA/H3C12/H4C3/H4C5	6
CC	GO:0015030	Cajal body	6/578	77/19717	2.541*10^-2	8.317*10^-2	5.777*10^-2	DKC1/FBL/SMN1/SNRPC/NOP58/GAR1	44
MF	GO:0003735	structural constituent of ribosome	44/572	202/17697	2.976*10^-24	1.699*10^-21	1.485*10^-21	RPL5/RPL6/RPL24/RPL30/RPL27A/RPL31/RPL35A/RPL37/RPL38/RPL39/RPL36A/MRPL12/RPS7/RPS20/RPS21/RPS24/RPS27A/DAP3/MRPL33/MRPL28/MRPL3/MRPL13/MRPL18/MRPL15/MRPL22/RPL26L1/MRPL51/MRPS17/MRPS23/MRPS21/MRPL20/MRPL47/MRPL17/MRPS15/MRPS9/MRPL36/MRPL11/MRPL9/MRPS34/MRPL57/MRPL24/MRPL43/MRPL52/MRPL55	8
MF	GO:0004298	threonine-type endopeptidase activity	8/572	21/17697	1.592*10^-7	3.029*10^-5	2.647*10^-5	PSMA1/PSMA2/PSMA4/PSMA7/PSMB1/PSMB3/PSMB4/PSMB6	8
MF	GO:0070003	threonine-type peptidase activity	8/572	21/17697	1.592*10^-7	3.029*10^-5	2.647*10^-5	PSMA1/PSMA2/PSMA4/PSMA7/PSMB1/PSMB3/PSMB4/PSMB6	10
MF	GO:0003954	NADH dehydrogenase activity	10/572	46/17697	1.642*10^-6	1.563*10^-4	1.366*10^-4	NDUFA2/NDUFAB1/NDUFB3/NDUFB4/NDUFB8/NDUFB10/NDUFS5/NDUFS6/NDUFS8/NDUFA12	10
MF	GO:0008137	NADH dehydrogenase (ubiquinone) activity	10/572	46/17697	1.642*10^-6	1.563*10^-4	1.366*10^-4	NDUFA2/NDUFAB1/NDUFB3/NDUFB4/NDUFB8/NDUFB10/NDUFS5/NDUFS6/NDUFS8/NDUFA12	10
MF	GO:0050136	NADH dehydrogenase (quinone) activity	10/572	46/17697	1.642*10^-6	1.563*10^-4	1.366*10^-4	NDUFA2/NDUFAB1/NDUFB3/NDUFB4/NDUFB8/NDUFB10/NDUFS5/NDUFS6/NDUFS8/NDUFA12	11
MF	GO:0016655	oxidoreductase activity, acting on NAD(P)H, quinone or similar compound as acceptor	11/572	60/17697	2.974*10^-6	2.426*10^-4	2.120*10^-4	NDUFA2/NDUFAB1/NDUFB3/NDUFB4/NDUFB8/NDUFB10/NDUFS5/NDUFS6/NDUFS8/DCXR/NDUFA12	16
MF	GO:0051082	unfolded protein binding	16/572	131/17697	5.123*10^-6	3.656*10^-4	3.195*10^-4	HSPE1/NPM1/PFDN1/PFDN2/PFDN4/PFDN5/PPIA/CCT3/PPIE/PPIH/PFDN6/CCT7/CCT4/CCT8/NUDCD2/PET100	30
MF	GO:0140098	catalytic activity, acting on RNA	30/572	386/17697	9.125*10^-6	5.790*10^-4	5.059*10^-4	DARS1/FBL/MRPL58/METTL1/POLR2C/POLR2G/POLR2H/POLR2I/POLR2K/RIDA/EMG1/RNASEH2A/RAD54B/MRM2/EXOSC3/POP5/TRMT112/RBMX2/CPSF3/POLR3K/EXOSC4/TRIT1/EXOSC5/ISY1/ERI3/TSEN34/RPP21/THUMPD2/TRPT1/PTRHD1	5
MF	GO:0031386	protein tag	5/572	11/17697	1.363*10^-5	7.780*10^-4	6.798*10^-4	NEDD8/RPS27A/SUMO2/SUMO1/UBL5	14
MF	GO:0009055	electron transfer activity	14/572	114/17697	1.857*10^-5	9.640*10^-4	8.423*10^-4	COX5B/COX6A1/COX6C/COX7B/NDUFS6/SDHB/UQCRB/UQCRH/COX7A2L/UQCR10/GLRX5/NDUFA12/FDX2/UQCRHL	15
MF	GO:0043021	ribonucleoprotein complex binding	15/572	133/17697	2.638*10^-5	1.255*10^-3	1.097*10^-3	CSNK2B/NME1/NPM1/SNRPA/SNRPC/SNRPD1/SNRPD3/UNG/NAA10/SECISBP2L/PQBP1/PPIH/PYM1/TIMM50/MALSU1	9
MF	GO:0019843	rRNA binding	9/572	63/17697	1.805*10^-4	7.391*10^-3	6.459*10^-3	RPL5/RPL37/EMG1/MRPL18/MRPS17/MRPL20/MRPL11/RPF1/RPF2	4
MF	GO:0008121	ubiquinol-cytochrome-c reductase activity	4/572	10/17697	1.942*10^-4	7.391*10^-3	6.459*10^-3	UQCRB/UQCRH/UQCR10/UQCRHL	4
MF	GO:0016681	oxidoreductase activity, acting on diphenols and related substances as donors, cytochrome as acceptor	4/572	10/17697	1.942*10^-4	7.391*10^-3	6.459*10^-3	UQCRB/UQCRH/UQCR10/UQCRHL	4
MF	GO:0016679	oxidoreductase activity, acting on diphenols and related substances as donors	4/572	11/17697	2.973*10^-4	1.061*10^-2	9.272*10^-3	UQCRB/UQCRH/UQCR10/UQCRHL	17
MF	GO:0008168	methyltransferase activity	17/572	215/17697	6.423*10^-4	2.157*10^-2	1.885*10^-2	FBL/GCSH/MEN1/METTL1/TYMS/ECE2/SMYD5/EMG1/METTL5/MRM2/LCMT1/TRMT112/DPH5/NDUFAF7/KMT2C/THUMPD2/METTL18	11
MF	GO:0016651	oxidoreductase activity, acting on NAD(P)H	11/572	107/17697	6.852*10^-4	2.174*10^-2	1.899*10^-2	NDUFA2/NDUFAB1/NDUFB3/NDUFB4/NDUFB8/NDUFB10/NDUFS5/NDUFS6/NDUFS8/DCXR/NDUFA12	4
MF	GO:0019104	DNA N-glycosylase activity	4/572	14/17697	8.348*10^-4	2.498*10^-2	2.183*10^-2	NTHL1/PCNA/UNG/SMUG1	8
MF	GO:0051536	iron-sulfur cluster binding	8/572	63/17697	9.186*10^-4	2.498*10^-2	2.183*10^-2	NDUFS8/NTHL1/SDHB/NUBP2/NFU1/GLRX5/FDX2/CISD2	8
MF	GO:0051540	metal cluster binding	8/572	63/17697	9.186*10^-4	2.498*10^-2	2.183*10^-2	NDUFS8/NTHL1/SDHB/NUBP2/NFU1/GLRX5/FDX2/CISD2	17
MF	GO:0016741	transferase activity, transferring one-carbon groups	17/572	226/17697	1.119*10^-3	2.904*10^-2	2.538*10^-2	FBL/GCSH/MEN1/METTL1/TYMS/ECE2/SMYD5/EMG1/METTL5/MRM2/LCMT1/TRMT112/DPH5/NDUFAF7/KMT2C/THUMPD2/METTL18	4
MF	GO:0035173	histone kinase activity	4/572	17/17697	1.837*10^-3	3.888*10^-2	3.398*10^-2	CCNB1/CDK1/JAK2/AURKB	4
MF	GO:0055106	ubiquitin-protein transferase regulator activity	4/572	17/17697	1.837*10^-3	3.888*10^-2	3.398*10^-2	AUP1/CDC20/RPL5/RPS7	5
MF	GO:0004129	cytochrome-c oxidase activity	5/572	28/17697	1.839*10^-3	3.888*10^-2	3.398*10^-2	COX5B/COX6A1/COX6C/COX7B/COX7A2L	5
MF	GO:0015002	heme-copper terminal oxidase activity	5/572	28/17697	1.839*10^-3	3.888*10^-2	3.398*10^-2	COX5B/COX6A1/COX6C/COX7B/COX7A2L	5
MF	GO:0016676	oxidoreductase activity, acting on a heme group of donors, oxygen as acceptor	5/572	28/17697	1.839*10^-3	3.888*10^-2	3.398*10^-2	COX5B/COX6A1/COX6C/COX7B/COX7A2L	6
MF	GO:0003899	DNA-directed 5'-3' RNA polymerase activity	6/572	41/17697	1.907*10^-3	3.889*10^-2	3.398*10^-2	POLR2C/POLR2G/POLR2H/POLR2I/POLR2K/POLR3K	5
MF	GO:0016675	oxidoreductase activity, acting on a heme group of donors	5/572	29/17697	2.163*10^-3	4.260*10^-2	3.722*10^-2	COX5B/COX6A1/COX6C/COX7B/COX7A2L	7
MF	GO:0005507	copper ion binding	7/572	59/17697	2.826*10^-3	5.380*10^-2	4.701*10^-2	S100A13/RNF7/COX17/PARK7/CUTA/COMMD1/COA6	6
MF	GO:0034062	5'-3' RNA polymerase activity	6/572	45/17697	3.098*10^-3	5.528*10^-2	4.831*10^-2	POLR2C/POLR2G/POLR2H/POLR2I/POLR2K/POLR3K	6
MF	GO:0097747	RNA polymerase activity	6/572	45/17697	3.098*10^-3	5.528*10^-2	4.831*10^-2	POLR2C/POLR2G/POLR2H/POLR2I/POLR2K/POLR3K	9
MF	GO:0003727	single-stranded RNA binding	9/572	95/17697	3.605*10^-3	6.093*10^-2	5.324*10^-2	HNRNPC/POLR2G/RPS7/SNRPC/SUPT4H1/CNBP/PPIE/TARDBP/RBMX	10
MF	GO:0003697	single-stranded DNA binding	10/572	113/17697	3.628*10^-3	6.093*10^-2	5.324*10^-2	MSH2/NME1/YBX1/PCBP2/POLR2G/POLR2H/RPA3/CNBP/RAD51AP1/SUB1	10
MF	GO:0004540	ribonuclease activity	10/572	114/17697	3.865*10^-3	6.306*10^-2	5.510*10^-2	RIDA/RNASEH2A/EXOSC3/POP5/CPSF3/EXOSC4/EXOSC5/ERI3/TSEN34/RPP21	4
MF	GO:0016799	hydrolase activity, hydrolyzing N-glycosyl compounds	4/572	21/17697	4.171*10^-3	6.615*10^-2	5.781*10^-2	NTHL1/PCNA/UNG/SMUG1	3
MF	GO:0001055	RNA polymerase II activity	3/572	11/17697	4.565*10^-3	6.730*10^-2	5.880*10^-2	POLR2C/POLR2H/POLR2K	3
MF	GO:0008097	5S rRNA binding	3/572	11/17697	4.565*10^-3	6.730*10^-2	5.880*10^-2	RPL5/MRPL18/RPF2	4
MF	GO:0008649	rRNA methyltransferase activity	4/572	22/17697	4.969*10^-3	6.730*10^-2	5.880*10^-2	FBL/EMG1/MRM2/TRMT112	4
MF	GO:0051537	2 iron, 2 sulfur cluster binding	4/572	22/17697	4.969*10^-3	6.730*10^-2	5.880*10^-2	SDHB/GLRX5/FDX2/CISD2	4
MF	GO:0070034	telomerase RNA binding	4/572	22/17697	4.969*10^-3	6.730*10^-2	5.880*10^-2	DKC1/HNRNPC/SNRPD3/GAR1	4
MF	GO:0140102	catalytic activity, acting on a rRNA	4/572	22/17697	4.969*10^-3	6.730*10^-2	5.880*10^-2	FBL/EMG1/MRM2/TRMT112	9
MF	GO:0004725	protein tyrosine phosphatase activity	9/572	100/17697	5.068*10^-3	6.730*10^-2	5.880*10^-2	ACP1/CDKN3/DUSP11/PTPN21/DUSP12/DUSP23/TIMM50/PTPMT1/PGP	19
MF	GO:0044389	ubiquitin-like protein ligase binding	19/572	308/17697	5.582*10^-3	7.244*10^-2	6.330*10^-2	CCNB1/JAK1/NEDD8/PA2G4/PCBP2/RPL5/RPS27A/SUMO2/ELOB/SUMO1/YWHAE/NAE1/PRDX6/RBX1/UBE2C/CHEK2/CACYBP/UBE2T/PRR7	10
MF	GO:0140101	catalytic activity, acting on a tRNA	10/572	122/17697	6.233*10^-3	7.909*10^-2	6.911*10^-2	DARS1/MRPL58/METTL1/POP5/TRIT1/TSEN34/RPP21/THUMPD2/TRPT1/PTRHD1	14
MF	GO:0004518	nuclease activity	14/572	205/17697	6.945*10^-3	8.621*10^-2	7.533*10^-2	NME1/NTHL1/RIDA/RNASEH2A/EXOSC3/POP5/CPSF3/EXOSC4/EXOSC5/TRIR/ERI3/TSEN34/RPP21/LAS1L	6
MF	GO:0140104	molecular carrier activity	6/572	54/17697	7.700*10^-3	9.355*10^-2	8.174*10^-2	NDUFAB1/RAN/COX17/NUTF2/PARK7/HIKESHI	38
KEGG	hsa03040	Spliceosome	38/290	151/8076	2.354*10^-22	4.026*10^-20	3.494*10^-20	FUS/HNRNPC/MAGOH/RP9/SRSF2/SRSF3/SRSF7/SNRPA/SNRPA1/SNRPC/SNRPD1/SNRPD2/SNRPD3/SNRPE/SNRPF/SNRPG/BUD31/RBM8A/PQBP1/ALYREF/SF3B4/BCAS2/PPIE/PPIH/USP39/SF3A3/SNRNP27/LSM6/LSM5/LSM4/LSM3/RBMX/CWC15/SF3B6/MAGOHB/ISY1/LSM2/SF3B5	36
KEGG	hsa03010	Ribosome	36/290	158/8076	1.190*10^-19	1.017*10^-17	8.831*10^-18	FAU/RPL5/RPL6/RPL24/RPL30/RPL27A/RPL31/RPL35A/RPL37/RPL38/RPL39/RPL36A/MRPL12/RPS7/RPS20/RPS21/RPS24/RPS27A/MRPL33/MRPL28/MRPL3/MRPL13/MRPL18/MRPL15/MRPL22/RPL26L1/MRPS17/MRPS21/MRPL20/MRPL17/MRPS15/MRPS9/MRPL36/MRPL11/MRPL9/MRPL24	40
KEGG	hsa05012	Parkinson disease	40/290	249/8076	4.955*10^-16	2.824*10^-14	2.451*10^-14	ATP5F1E/ATP5MC2/ATP5PF/COX5B/COX6A1/COX6C/COX7B/NDUFA2/NDUFAB1/NDUFB3/NDUFB4/NDUFB8/NDUFB10/NDUFS5/NDUFS6/NDUFS8/PSMA1/PSMA2/PSMA4/PSMA7/PSMB1/PSMB3/PSMB4/PSMB6/PSMD4/RPS27A/SDHB/SLC18A2/UQCRB/UQCRH/SEM1/COX7A2L/PSMD14/ATP5PD/ADRM1/PARK7/UQCR10/NDUFB11/NDUFA12/UQCRHL	44
KEGG	hsa05016	Huntington disease	44/290	306/8076	1.033*10^-15	4.418*10^-14	3.834*10^-14	ATP5F1E/ATP5MC2/ATP5PF/COX5B/COX6A1/COX6C/COX7B/HDAC2/NDUFA2/NDUFAB1/NDUFB3/NDUFB4/NDUFB8/NDUFB10/NDUFS5/NDUFS6/NDUFS8/POLR2C/POLR2G/POLR2H/POLR2I/POLR2K/PSMA1/PSMA2/PSMA4/PSMA7/PSMB1/PSMB3/PSMB4/PSMB6/PSMD4/SDHB/UQCRB/UQCRH/SEM1/COX7A2L/PSMD14/ATP5PD/ADRM1/UQCR10/NDUFB11/ATG2B/NDUFA12/UQCRHL	47
KEGG	hsa05014	Amyotrophic lateral sclerosis	47/290	364/8076	6.863*10^-15	2.347*10^-13	2.037*10^-13	ATP5F1E/ATP5MC2/ATP5PF/COX5B/COX6A1/COX6C/COX7B/FUS/NDUFA2/NDUFAB1/NDUFB3/NDUFB4/NDUFB8/NDUFB10/NDUFS5/NDUFS6/NDUFS8/PSMA1/PSMA2/PSMA4/PSMA7/PSMB1/PSMB3/PSMB4/PSMB6/PSMD4/SDHB/SRSF3/SRSF7/UQCRB/UQCRH/SEM1/RAE1/COX7A2L/ALYREF/PSMD14/TOMM40/ATP5PD/ADRM1/SETX/TARDBP/UQCR10/NDUFB11/ATG2B/NDUFA12/NUP37/UQCRHL	28
KEGG	hsa00190	Oxidative phosphorylation	28/290	133/8076	1.489*10^-14	4.245*10^-13	3.684*10^-13	ATP5F1E/ATP5MC2/ATP5ME/ATP5PF/COX5B/COX6A1/COX6C/COX7B/NDUFA2/NDUFAB1/NDUFB3/NDUFB4/NDUFB8/NDUFB10/NDUFS5/NDUFS6/NDUFS8/SDHB/UQCRB/UQCRH/COX7A2L/ATP5MF/COX17/ATP5PD/UQCR10/NDUFB11/NDUFA12/UQCRHL	38
KEGG	hsa05020	Prion disease	38/290	273/8076	3.259*10^-13	7.962*10^-12	6.910*10^-12	ATP5F1E/ATP5MC2/ATP5PF/COX5B/COX6A1/COX6C/COX7B/CSNK2B/NDUFA2/NDUFAB1/NDUFB3/NDUFB4/NDUFB8/NDUFB10/NDUFS5/NDUFS6/NDUFS8/PSMA1/PSMA2/PSMA4/PSMA7/PSMB1/PSMB3/PSMB4/PSMB6/PSMD4/SDHB/UQCRB/UQCRH/SEM1/COX7A2L/PSMD14/ATP5PD/ADRM1/UQCR10/NDUFB11/NDUFA12/UQCRHL	43
KEGG	hsa05010	Alzheimer disease	43/290	369/8076	3.975*10^-12	8.497*10^-11	7.375*10^-11	ATP5F1E/ATP5MC2/ATP5PF/COX5B/COX6A1/COX6C/COX7B/CSNK2B/HSD17B10/LRP1/NDUFA2/NDUFAB1/NDUFB3/NDUFB4/NDUFB8/NDUFB10/NDUFS5/NDUFS6/NDUFS8/PSMA1/PSMA2/PSMA4/PSMA7/PSMB1/PSMB3/PSMB4/PSMB6/PSMD4/SDHB/UQCRB/UQCRH/SEM1/NAE1/COX7A2L/PSMD14/ATP5PD/ADRM1/UQCR10/NDUFB11/ATG2B/PSENEN/NDUFA12/UQCRHL	31
KEGG	hsa04714	Thermogenesis	31/290	231/8076	1.513*10^-10	2.876*10^-9	2.496*10^-9	ACTL6A/ATP5F1E/ATP5MC2/ATP5ME/ATP5PF/COX5B/COX6A1/COX6C/COX7B/NDUFA2/NDUFAB1/NDUFB3/NDUFB4/NDUFB8/NDUFB10/NDUFS5/NDUFS6/NDUFS8/SDHB/UQCRB/UQCRH/COX7A2L/ATP5MF/COX17/ATP5PD/UQCR10/NDUFB11/NDUFAF7/NDUFA12/COA6/UQCRHL	45
KEGG	hsa05022	Pathways of neurodegeneration - multiple diseases	45/290	475/8076	1.325*10^-9	2.265*10^-8	1.966*10^-8	ATP5F1E/ATP5MC2/ATP5PF/COX5B/COX6A1/COX6C/COX7B/CSNK2B/FUS/HSD17B10/NDUFA2/NDUFAB1/NDUFB3/NDUFB4/NDUFB8/NDUFB10/NDUFS5/NDUFS6/NDUFS8/PSMA1/PSMA2/PSMA4/PSMA7/PSMB1/PSMB3/PSMB4/PSMB6/PSMD4/RPS27A/SDHB/UQCRB/UQCRH/SEM1/COX7A2L/PSMD14/TOMM40/ATP5PD/ADRM1/PARK7/TARDBP/UQCR10/NDUFB11/ATG2B/NDUFA12/UQCRHL	25
KEGG	hsa03013	RNA transport	25/290	186/8076	9.706*10^-9	1.509*10^-7	1.310*10^-7	FUS/MAGOH/RAN/SMN1/SUMO2/UBE2I/SUMO1/AAAS/RAE1/GEMIN2/EIF3I/EIF2B4/RBM8A/ALYREF/TACC3/RNPS1/TARDBP/POP5/MAGOHB/NUP37/THOC6/GEMIN6/RPP21/THOC7/PYM1	12
KEGG	hsa03050	Proteasome	12/290	46/8076	4.776*10^-8	6.806*10^-7	5.907*10^-7	PSMA1/PSMA2/PSMA4/PSMA7/PSMB1/PSMB3/PSMB4/PSMB6/PSMD4/SEM1/PSMD14/ADRM1	21
KEGG	hsa04932	Non-alcoholic fatty liver disease	21/290	150/8076	7.592*10^-8	9.987*10^-7	8.668*10^-7	COX5B/COX6A1/COX6C/COX7B/NDUFA2/NDUFAB1/NDUFB3/NDUFB4/NDUFB8/NDUFB10/NDUFS5/NDUFS6/NDUFS8/SDHB/UQCRB/UQCRH/COX7A2L/UQCR10/NDUFB11/NDUFA12/UQCRHL	10
KEGG	hsa03018	RNA degradation	10/290	79/8076	4.901*10^-4	5.987*10^-3	5.196*10^-3	C1D/LSM6/LSM5/LSM4/LSM3/EXOSC3/EXOSC1/EXOSC4/EXOSC5/LSM2	6
KEGG	hsa03020	RNA polymerase	6/290	31/8076	7.018*10^-4	8.001*10^-3	6.944*10^-3	POLR2C/POLR2G/POLR2H/POLR2I/POLR2K/POLR3K	7
KEGG	hsa03420	Nucleotide excision repair	7/290	47/8076	1.311*10^-3	1.401*10^-2	1.216*10^-2	CETN2/PCNA/RFC4/RPA3/RBX1/POLE4/GTF2H5	12
KEGG	hsa04110	Cell cycle	12/290	124/8076	1.605*10^-3	1.614*10^-2	1.401*10^-2	CCNB1/CDK1/CDC20/HDAC2/PCNA/YWHAE/CCNB2/PTTG1/RBX1/MAD2L2/CHEK2/ANAPC11	13
KEGG	hsa05017	Spinocerebellar ataxia	13/290	143/8076	1.840*10^-3	1.748*10^-2	1.517*10^-2	PSMA1/PSMA2/PSMA4/PSMA7/PSMB1/PSMB3/PSMB4/PSMB6/PSMD4/SEM1/PSMD14/ADRM1/ATG2B	11
KEGG	hsa03008	Ribosome biogenesis in eukaryotes	11/290	111/8076	2.058*10^-3	1.852*10^-2	1.607*10^-2	CSNK2B/DKC1/FBL/RAN/TCOF1/MPHOSPH10/EMG1/GNL2/POP5/NOP58/GAR1	10
KEGG	hsa03015	mRNA surveillance pathway	10/290	97/8076	2.426*10^-3	2.075*10^-2	1.801*10^-2	FUS/MAGOH/PABPN1/RBM8A/ALYREF/RNPS1/TARDBP/CPSF3/MAGOHB/PYM1	9
KEGG	hsa04260	Cardiac muscle contraction	9/290	87/8076	3.859*10^-3	3.143*10^-2	2.728*10^-2	COX5B/COX6A1/COX6C/COX7B/UQCRB/UQCRH/COX7A2L/UQCR10/UQCRHL	12
KEGG	hsa04120	Ubiquitin mediated proteolysis	12/290	140/8076	4.418*10^-3	3.434*10^-2	2.981*10^-2	CDC20/RPS27A/ELOC/ELOB/UBE2I/HERC3/HERC1/RNF7/RBX1/UBE2C/UBE2S/ANAPC11	5
KEGG	hsa03410	Base excision repair	5/290	33/8076	5.994*10^-3	4.456*10^-2	3.868*10^-2	NTHL1/PCNA/UNG/SMUG1/POLE4	4
KEGG	hsa03430	Mismatch repair	4/290	23/8076	8.405*10^-3	5.967*10^-2	5.179*10^-2	MSH2/PCNA/RFC4/RPA3	5
KEGG	hsa03030	DNA replication	5/290	36/8076	8.724*10^-3	5.967*10^-2	5.179*10^-2	PCNA/RFC4/RPA3/RNASEH2A/POLE4	11
KEGG	hsa05322	Systemic lupus erythematosus	11/290	136/8076	9.626*10^-3	6.331*10^-2	5.495*10^-2	H2AX/H2AZ1/SNRPD1/SNRPD3/H2AC16/H2AC17/H2AC20/H2BC13/H3C12/H4C3/H4C5	6
KEGG	hsa03460	Fanconi anemia pathway	6/290	54/8076	1.237*10^-2	7.832*10^-2	6.798*10^-2	RPA3/UBE2T/FAAP24/RMI2/CENPX/CENPS
